# Supplementary material for: A pragmatic randomised controlled trial of ‘PhysioDirect’ telephone assessment and advice services for patients with musculoskeletal problems: economic evaluation
Source: PubMed Central journal article supplement (PMC3796275; doi:10.1136/bmjopen-2013-003406), 2013-10-01
Supplement: bmjopen-2013-003406.draft_revisions.pdf [file bmjopen-2013-003406.draft_revisions.pdf]

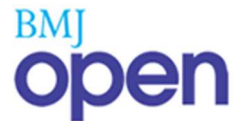

**A pragmatic randomised controlled trial of 'PhysioDirect' telephone assessment and advice services for patients with musculoskeletal problems: economic evaluation**

|                                 |                                                                                                                                                                                                                                                                                                                                                                                                                                                                                                                                                                                                                                               |
|---------------------------------|-----------------------------------------------------------------------------------------------------------------------------------------------------------------------------------------------------------------------------------------------------------------------------------------------------------------------------------------------------------------------------------------------------------------------------------------------------------------------------------------------------------------------------------------------------------------------------------------------------------------------------------------------|
| Journal:                        | <i>BMJ Open</i>                                                                                                                                                                                                                                                                                                                                                                                                                                                                                                                                                                                                                               |
| Manuscript ID:                  | bmjopen-2013-003406                                                                                                                                                                                                                                                                                                                                                                                                                                                                                                                                                                                                                           |
| Article Type:                   | Research                                                                                                                                                                                                                                                                                                                                                                                                                                                                                                                                                                                                                                      |
| Date Submitted by the Author:   | 13-Jun-2013                                                                                                                                                                                                                                                                                                                                                                                                                                                                                                                                                                                                                                   |
| Complete List of Authors:       | Hollinghurst, Sandra; University of Bristol, Community Based Medicine Coast, Joanna; University of Birmingham, Department of Health Economics Busby, John; University of Bristol, Bishop, Annette; Keele University, Foster, Nadine; Keele University, Primary Care Musculoskeletal Research Centre<br>Franchini, Angelo; Imperial College, London, Grove, Sean; Bristol Community Health, Hall, Jeanette; Bristol Community Health, Hopper, Cherida; University of Bristol, Kaur, Surinder; University of Bristol, Montgomery, Alan; University of Nottingham, Salisbury, Chris; University of Bristol, Academic Unit of Primary Health Care |
| <b>Primary Subject Heading</b>: | Health economics                                                                                                                                                                                                                                                                                                                                                                                                                                                                                                                                                                                                                              |
| Secondary Subject Heading:      | General practice / Family practice                                                                                                                                                                                                                                                                                                                                                                                                                                                                                                                                                                                                            |
| Keywords:                       | economic evaluation, physiotherapy, telehealth, PRIMARY CARE, costs & cost analysis                                                                                                                                                                                                                                                                                                                                                                                                                                                                                                                                                           |
|                                 |                                                                                                                                                                                                                                                                                                                                                                                                                                                                                                                                                                                                                                               |

SCHOLARONE™  
Manuscripts

1  
2  
3 **A pragmatic randomised controlled trial of 'PhysioDirect' telephone**  
4 **assessment and advice services for patients with musculoskeletal problems:**  
5 **economic evaluation**  
6  
7

8  
9 Sandra Hollinghurst, Joanna Coast, John Busby, Annette Bishop, Nadine E Foster, Angelo Franchini,  
10 Sean Grove, Jeanette Hall, Cherida Hopper, Surinder Kaur, Alan A Montgomery, Chris Salisbury  
11

12 Sandra Hollinghurst, PhD. Senior Lecturer in Health Economics<sup>1</sup>

13 Joanna Coast, PhD. Professor of Health Economics<sup>2</sup>

14 John Busby, MSc. Research Assistant in Health Economics<sup>1</sup>

15 Annette Bishop, PhD. Research Physiotherapist<sup>3</sup>

16 Nadine E Foster, D.Phil. NIHR Professor of Musculoskeletal Health in Primary Care<sup>3</sup>

17 Angelo Franchini, MSc. Research Associate<sup>4</sup>

18 Sean Grove, MSc. Clinical Lead Physiotherapy<sup>5</sup>

19 Jeanette Hall, Grad Dip Phys. Operational lead for Outpatient Physiotherapy<sup>5</sup>

20 Cherida Hopper, PhD. Trial Manager<sup>1</sup>

21 Surinder Kaur, BSc. Research Associate<sup>1</sup>

22 Alan A Montgomery, PhD. Professor of Medical Statistics and Clinical Trials<sup>6</sup>

23 Chris Salisbury, MD. Professor of Primary Health Care<sup>1</sup>  
24  
25  
26  
27  
28

29 <sup>1</sup>Centre for Academic Primary Care, School of Social and Community Medicine, University of Bristol,  
30 UK

31 <sup>2</sup>Health Economics Unit, School of Health & Population Sciences, University of Birmingham, UK

32 <sup>3</sup>Arthritis Research UK Primary Care Centre, Primary Care Sciences, Keele University, UK

33 <sup>4</sup>Imperial Clinical Trials Unit, School of Public Health Medicine, Imperial College, London, UK

34 <sup>5</sup>Musculoskeletal Outpatient Department, Bristol Community Health, UK

35 <sup>6</sup>Nottingham Clinical Trials Unit, Queen's Medical Centre, Nottingham, UK  
36  
37  
38  
39

40 **Correspondence:**

41 Sandra Hollinghurst, School of Social and Community Medicine, University of Bristol, Canynge Hall,  
42 39 Whatley Road, Bristol BS8 2PS

43 s.p.hollinghurst@bristol.ac.uk

44 0117 331 3901  
45  
46  
47  
48  
49

50 Key Words: economic evaluation; physiotherapy; telehealth; primary care; cost & cost analysis  
51  
52  
53  
54  
55  
56  
57  
58  
59  
60

1  
2  
3 **A pragmatic randomised controlled trial of 'PhysioDirect' telephone assessment and**  
4 **advice services for patients with musculoskeletal problems: economic evaluation**  
5  
6

7 **ABSTRACT**  
8

9  
10 **Objectives**

11 To compare the cost-effectiveness of PhysioDirect with usual physiotherapy care for patients  
12 with musculoskeletal problems.  
13

14  
15  
16  
17 **Design**

18 (i) Cost-consequences comparing cost to the NHS, to patients, and the value of lost productivity  
19 with a range of outcomes. (ii) Cost-utility analysis comparing cost to the NHS with Quality  
20 Adjusted Life Years (QALYs)  
21  
22  
23

24  
25 **Setting**

26 Four physiotherapy services in England  
27  
28  
29

30 **Participants**

31 Adults (18+) referred by their general practitioner or self-referred for physiotherapy.  
32  
33  
34

35 **Interventions**

36 PhysioDirect involved telephone assessment and advice followed by face-to-face care if needed.  
37 Usual care patients were placed on a waiting list for face-to-face care.  
38  
39  
40  
41

42 **Primary and secondary outcome measures**

43 Primary clinical outcome: physical component summary measure from the SF-36v2 at six months.  
44 Secondary outcomes included: Measure Yourself Medical Outcomes Profile; a Global Improvement  
45 Score; response to treatment; patient satisfaction; waiting time.  
46  
47 Outcome for the cost-utility analysis: QALYs  
48  
49  
50

51  
52 **Results**

53 2249 patients took part (1506 PhysioDirect; 743 usual care).  
54  
55  
56  
57  
58  
59  
60

1  
2  
3 (i) Cost-consequences: there was no evidence of a difference between the two groups in the cost of  
4 physiotherapy, other NHS services, personal costs or value of time off work. Outcomes were also  
5 similar.  
6

7  
8 (ii) Cost-utility analysis based on complete cases (n=1,272). Total NHS costs, including the cost of  
9 physiotherapy were higher in the PhysioDirect group by £19.30 (95% CI: -£37.60 to £76.19) and  
10 there was a QALY gain of 0.007 (95% CI: -0.003 to 0.016). The incremental cost-effectiveness ratio  
11 was £2,889 and the net monetary benefit at  $\lambda$ =£20,000 was £117 (95% CI: -£86 to £310)  
12  
13

## 14 15 16 **Conclusions**

17 PhysioDirect may be a cost-effective alternative to usual physiotherapy care, though only with  
18 careful management of staff time. Physiotherapists providing the service must be more fully  
19 occupied than was possible under trial conditions: consideration should be given to the scale of  
20 operation, opening times of the service, and flexibility in the methods used to contact patients.  
21  
22  
23  
24  
25  
26  
27  
28  
29  
30  
31  
32  
33  
34  
35  
36  
37  
38  
39  
40  
41  
42  
43  
44  
45  
46  
47  
48  
49  
50  
51  
52  
53  
54  
55  
56  
57  
58  
59  
60

## Article Summary

### Article focus

- What is the cost of providing PhysioDirect telephone assessment and advice, followed by face-to-face care if needed, to adults with musculoskeletal pain problems, compared with usual physiotherapy care?
- What are the patient benefits of PhysioDirect compared with usual care?
- Is PhysioDirect a cost-effective alternative to usual care for primary care patients with musculoskeletal conditions?

### Key messages

- There was very little difference between the two groups in terms of cost or outcomes
- PhysioDirect has potential to be a cost-effective alternative to usual care but requires careful management of staff resources

### Strengths and limitations of this study

- Findings are based on a large sample of patients with a wide range of musculoskeletal problems based in diverse locations
- The study takes a broad perspective, including the health care provider, patients, and a valuation of lost productivity
- Physiotherapists were constrained by trial conditions and were underutilised

## 1 INTRODUCTION

2 There is a trend to explore the use of new technology in the delivery of health care, particularly the  
3 use of telephone assessment and triage, as for example in NHS Direct.<sup>1</sup> These services aim to better  
4 manage patient demand, and research has shown that telephone based services can be safe,  
5 clinically accurate, cost-effective, acceptable to patients, and reduce the workload of clinicians,<sup>2-5</sup>  
6 although there have been some concerns about using telephone triage in patients presenting with  
7 acute health problems.<sup>6</sup>

8  
9 Musculoskeletal pain problems are one of the most common causes of disability. Over a quarter of  
10 all patients registered in general practice will consult at least once for a musculoskeletal problem  
11 each year,<sup>7,8</sup> with musculoskeletal pain accounting for around 15% of all GP consultations.<sup>9</sup> This high  
12 prevalence of musculoskeletal problems results in large direct and indirect healthcare costs,<sup>10</sup>  
13 estimated for low back pain alone at £10,668 million for the UK in 1998<sup>11</sup> and rising substantially  
14 since then.<sup>12</sup> Most patients are managed with advice and analgesia but many are referred to  
15 physiotherapists, with 1.23 million new referrals each year from GPs and 4.4 million in total.<sup>13</sup>  
16 Ensuring timely access to physiotherapy has long been an issue within the UK NHS, with waiting  
17 times of more than four months in some areas. Patients may suffer unnecessary pain and disability,  
18 and there are high productivity losses: for example, back pain accounts for some 120 million days of  
19 certified absence from work each year.<sup>11</sup> Delay may also cause NHS inefficiencies on the one hand as  
20 some patients recover and do not attend their physiotherapy appointment when it finally arrives,  
21 whilst on the other, some patients continue to access more expensive forms of treatment whilst  
22 awaiting their appointment.

23  
24 In response to these problems, physiotherapy services have drawn on the new service models and a  
25 range of 'PhysioDirect' services have been developed. These vary in format though they commonly  
26 involve a physiotherapist assessing a patient's musculoskeletal pain problem over the telephone,

1  
2  
3 1 sometimes supported by computerised assessment templates, offering tailored, self-management  
4  
5 2 advice supplemented by written advice sent by post. Alternatively if the assessment findings  
6  
7 3 suggest that face-to-face care is needed this is arranged, and patients who are initially managed by  
8  
9 4 telephone advice can phone back for further advice and/or face-to-face treatment.<sup>14</sup> There is,  
10  
11 5 however, limited evidence about the costs and benefits of this approach within physiotherapy. Local  
12  
13 6 evaluations and non-randomised studies suggest that these services may be popular with patients<sup>15-</sup>  
14  
15 7 <sup>17</sup> and diagnoses made by physiotherapists over the telephone are comparable to diagnoses reached  
16  
17 8 in face-to-face assessments<sup>18-20</sup> although there is some concern that the experience of the  
18  
19 9 physiotherapist providing the telephone assessment might be important.<sup>18,21</sup>  
20  
21  
22  
23

24  
25 11 In particular there is no information about the costs or cost-effectiveness of PhysioDirect services,  
26  
27 12 despite: (i) a major underlying rationale for their development being to generate greater efficiency  
28  
29 13 in the use of resources; and (ii) a ready presumption that telephone-based services result in lower  
30  
31 14 costs (by assuming that services better use physiotherapy time, use less costly telephone  
32  
33 15 consultations and reduce rates of appointment non-attendance). Without such evidence, preferably  
34  
35 16 generated alongside high quality primary evidence obtained using rigorous study designs, it remains  
36  
37 17 unclear whether such services should be more widely implemented. This paper reports the results of  
38  
39 18 an economic evaluation conducted alongside a randomised controlled trial powered to generate  
40  
41 19 evidence on whether PhysioDirect services for primary care patients with musculoskeletal problems  
42  
43 20 produce equivalent outcomes to usual face-to-face services.  
44  
45  
46  
47  
48  
49  
50

## 51 **METHOD**

### 52 53 24 **Study design**

54  
55 25 We conducted an economic evaluation alongside a randomised controlled trial to establish the cost-  
56  
57 26 effectiveness of PhysioDirect compared with usual care based only on face-to-face treatment over a  
58  
59  
60

1 period of 6 months. The trial and its clinical findings have been reported in full elsewhere.<sup>14,22</sup> The  
2 primary perspective for the economic evaluation was the health and social care provider, as that is  
3 of greatest interest to UK policy makers.<sup>23</sup> However, the nature of the intervention suggests there  
4 could be an impact on patients' costs, and as it is known that musculoskeletal conditions account for  
5 a considerable amount of time off work<sup>10,11</sup> we included these perspectives in the analysis. We used  
6 a cost-consequences approach to compare cost from all three perspectives (health care provider,  
7 patients and carers, lost productivity) with a range of clinical outcomes and used a cost-utility  
8 analysis to compare cost to the National Health Service (NHS) with Quality-Adjusted Life-Years  
9 (QALYs).

10

### 11 **Setting and participants**

12 We recruited adults aged 18 and over from four community physiotherapy services in England –  
13 Bristol, Somerset, Stoke-on-Trent, and Cheshire – which provided diversity in terms of socio-  
14 economic status and a mix of urban and rural communities. All patients referred by their general  
15 practitioner (GP), or who referred themselves, for physiotherapy for a non-urgent musculoskeletal  
16 problem were invited to take part. Patients were randomised to PhysioDirect or usual care on a two  
17 to one basis to increase the chances of the PhysioDirect service being fully utilised.

18

### 19 **Interventions**

20 The intervention has been reported in detail elsewhere<sup>14,22</sup>. Patients randomised to the PhysioDirect  
21 service received an invitation to telephone a senior (band 6 or above) specially trained  
22 physiotherapist, who assessed their musculoskeletal problem with the aid of previously developed  
23 computerised templates.<sup>22</sup> These templates were provided by Huntingdonshire Primary Care Trust,  
24 which has been operating a similar service since 2001. Patients were then sent appropriate advice  
25 leaflets about self-management and exercises to try at home, and invited to phone again and/or



1  
2  
3 1 make a face-to-face appointment if necessary. Patients randomised to usual care were put on the  
4  
5 2 usual service waiting list for face-to-face assessment and treatment.  
6  
7  
8  
9

#### 4 **Outcome measures**

10  
11 5 We used the EQ-5D-3L<sup>24</sup>, valued using the UK tariff,<sup>25</sup> to estimate QALYs gained for the cost-utility  
12  
13 6 analysis. The primary outcome for the trial was the physical component summary (PCS) measure  
14  
15 7 from the SF-36v2 questionnaire<sup>26</sup> and secondary clinical outcomes included: the Measure Yourself  
16  
17 8 Medical Outcomes Profile (MYMOP);<sup>27</sup> a Global Improvement Score – a single question about overall  
18  
19 9 improvement; a composite measure of response to treatment including pain, function and overall  
20  
21 10 improvement (OMERACT OARSI);<sup>28</sup> patient satisfaction; and waiting time to first treatment advice  
22  
23 11 from a physiotherapist. All outcomes (except the global improvement score and waiting time to first  
24  
25 12 treatment advice) were measured at baseline, 6 weeks and 6 months and were obtained from a self  
26  
27 13 completed questionnaire administered at these three time points.  
28  
29  
30  
31  
32

#### 15 **Resource use**

33  
34  
35 16 The analysis was based on costs related to the reason for which the patient was referred to the  
36  
37 17 physiotherapy service. We identified relevant resources in discussion with participating  
38  
39 18 physiotherapists and service managers. Direct costs to the health care provider included: cost of  
40  
41 19 initial and follow-up physiotherapy consultations; primary and community consultations; hospital  
42  
43 20 care; and prescribed medication. Patient and carer costs included: telephone calls to the  
44  
45 21 PhysioDirect service; travel; over the counter medication; prescription costs; private therapy and  
46  
47 22 purchase of equipment; extra domestic help; and loss of earnings. Lost productivity was estimated  
48  
49 23 separately in relation to time off work to attend physiotherapy appointments and time off because  
50  
51 24 of the musculoskeletal condition itself.  
52  
53  
54  
55  
56  
57  
58  
59  
60

1  
2  
3 1 Patient level data about all physiotherapy appointments and consultations were recorded either  
4  
5 2 automatically by computer or by the physiotherapist treating the patient. For those in the  
6  
7 3 intervention group, the PhysioDirect assessment software recorded which physiotherapist  
8  
9 4 conducted each telephone call, and the duration of each call. In addition to the time logged on to  
10  
11 5 the system physiotherapists had to carry out administrative activities following each telephone call,  
12  
13 6 such as collating information to send to the patient by post. The time spent on these activities was  
14  
15 7 estimated from information available at one site (Bristol) where manual recording of the entire  
16  
17 8 encounter supplemented the electronic recording.  
18  
19 9

20  
21  
22 10 Physiotherapists assigned to the PhysioDirect service were required to be available throughout the  
23  
24 11 time the service was 'open' but they were not usually fully engaged in dealing with PhysioDirect  
25  
26 12 patients during these hours. We conducted an observational time and motion study at each of the  
27  
28 13 four sites to determine how they occupied their non-PhysioDirect contact time in order to apportion  
29  
30 14 costs appropriately. Time and motion data were collected at points in the study when the sites were  
31  
32 15 expected to be fully operational, and across a mix of day, time of day, and location. The capital costs  
33  
34 16 required to run a telephone services are potentially less than for a face-to-face service. Each site  
35  
36 17 provided information about space and equipment required to run their telephone service and we  
37  
38 18 used this to estimate an overall percentage reduction of capital costs for these compared with a  
39  
40 19 standard face-to-face service.  
41  
42  
43  
44  
45

46 21 Data about all face-to-face appointments were recorded routinely. These data included the length of  
47  
48 22 appointment, the grade of the physiotherapist seen, and information about missed appointments.  
49  
50  
51  
52

53 24 Information about other NHS resource use was collected, where possible, from general practice  
54  
55 25 records and supplemented by information gained directly from patients. General practice notes  
56  
57 26 were scrutinised for patient level data on primary care consultations and prescribed medication. We  
58  
59  
60

1 included all consultations at which the musculoskeletal condition for which the patient was referred  
2 to physiotherapy was mentioned and these were recorded by type of consultation (for example,  
3 face-to-face, telephone, out of hours, home visit) and by type of professional seen (for example, GP,  
4 nurse). It was not feasible to distinguish between medication prescribed for the condition for which  
5 the patient was referred for physiotherapy and any other musculoskeletal problem so we included  
6 all medication of a potentially relevant type, defined using British National Formulary (BNF)<sup>29</sup> coding.  
7 These were: Analgesics (chapters 4.7.1 – 4.7.2); Non-steroidal anti-inflammatory drugs (10.1.1);  
8 Local corticosteroid injections (10.1.2.2); and Drugs for the relief of soft-tissue inflammation (10.3).

9  
10 A questionnaire was administered to participants at 6 weeks and 6 months after randomisation to  
11 obtain resource use data not available elsewhere. These included information about hospital care  
12 related to the condition for which the patient was referred to physiotherapy: visits to Accident &  
13 Emergency, outpatient appointments, and inpatient stays. Information about personal expenditure  
14 relevant to the patient's musculoskeletal condition was also gained from the questionnaire at 6  
15 weeks and 6 months. We asked about the cost of travel to physiotherapy and other health care  
16 appointments, expenditure on over the counter medication, prescription costs, use of private  
17 therapies and their cost, expenditure on equipment or devices, and extra help at home. In addition,  
18 participants were asked about any time off work, and the associated loss of earnings, because of  
19 their condition or to attend health care appointments relating to the condition including usual care  
20 physiotherapy and PhysioDirect.

## 21 22 **Valuation of resource use**

23 Table 1 gives the unit costs and sources used to value the health care resources. We used Curtis<sup>30</sup> to  
24 value primary and community health care and Department of Health reference costs<sup>31</sup> for all  
25 hospital-based care. The cost of prescribed medication was estimated from that published in the  
26 BNF,<sup>29</sup> adjusted to allow for the discount available to the NHS, and the professional fee and

1  
2  
3 1 container allowance in accordance with the Drug Tariff for England.<sup>32</sup> Personal expenditure was  
4  
5 2 reported directly by the participants, the exception being travel by car, which was reported as  
6  
7 3 mileage and costed using the AA schedule of motoring costs.<sup>33</sup> Time off work was valued using the  
8  
9 4 median gross weekly earnings by age and sex.<sup>34</sup>  
10  
11  
12 5

13  
14 6 *Table 1 here*  
15  
16 7  
17

18 8 The cost of face-to-face physiotherapy consultations was estimated by adapting the methods of  
19  
20 9 Curtis<sup>30</sup> to obtain a different unit cost for each band of staff at each site. National median pay rates,  
21  
22 10 by band,<sup>36</sup> were adjusted to allow for National Insurance, superannuation, and overheads, as per  
23  
24 11 Curtis, then further adjusted to allow for band and site specific non-contact time. Information about  
25  
26 12 the proportion of time physiotherapists on each grade typically spend in direct contact with patients  
27  
28 13 was provided by the four physiotherapy service managers. This provided us with a cost per hour for  
29  
30 14 each band of staff at each site.  
31  
32

33 15  
34  
35 16 The unit cost of physiotherapists working in the PhysioDirect service was estimated in a similar way,  
36  
37 17 but allowing for the reduced cost of capital and overheads; information from the site managers  
38  
39 18 indicated this to be about 50%. To obtain a cost per hour of telephone contact we used information  
40  
41 19 from the computerised records of the PhysioDirect service, which identified the proportion of time  
42  
43 20 spent by physiotherapists actually dealing with PhysioDirect patients. We then combined this with  
44  
45 21 data from the time and motion study, which identified activities undertaken during non-contact  
46  
47 22 time, for example, administration relating to face-to-face appointments or general administration, to  
48  
49 23 give a cost per hour for each band of staff at each site.  
50  
51  
52

53 24  
54  
55 25 All costs were valued in £ sterling at 2009 prices, adjusted for inflation where necessary.<sup>30</sup>  
56  
57 26  
58  
59  
60

## 1 Data analysis

2 We investigated the amount of each resource used by patients in each group using frequencies,  
3 means and medians. Mean total cost per participant was derived by combining resource use with  
4 unit costs.

5  
6 QALYs were derived from responses to the EQ-5D-3L at baseline, 6 weeks and 6 months using  
7 valuations from the UK general population.<sup>25</sup> These values, representing health-related quality of life  
8 on a scale between zero (death) and 1 (best imaginable health), were used to compute QALYs  
9 experienced over the 6 month period using the area under the curve approach and adjusting for any  
10 difference between the groups at baseline.<sup>37</sup>

11  
12 A cost-consequences matrix was constructed using all available data. We compared costs from all  
13 three perspectives (health care provider, patients and carers, lost productivity) with the SF-36v2 PCS,  
14 MYMOP, Global Improvement Score, OMERACT OARS, patient satisfaction, waiting time, and QALYs.

15  
16 The cost-utility analysis was carried out using data on patients for whom we had complete NHS cost  
17 and QALY data. An incremental cost-effectiveness ratio (ICER) was constructed, comparing the  
18 difference in mean total cost per patient with mean difference in QALYs. Uncertainty around the  
19 ICER was captured by replicating it 5000 times using the bootstrapping technique, estimating a  
20 confidence interval around the net monetary benefit, and constructing a cost-effectiveness  
21 acceptability curve.

22  
23 We used the multiple imputation by chained equation procedure to address the issue of missing cost  
24 and EQ-5D data.<sup>38</sup> This technique uses a regression model to estimate missing values from known  
25 values. In addition to cost and EQ-5D-3L variables the imputation model also included randomisation

1  
2  
3  
4  
5  
6  
7  
8  
9  
10  
11  
12  
13  
14  
15  
16  
17  
18  
19  
20  
21  
22  
23  
24  
25  
26  
27  
28  
29  
30  
31  
32  
33  
34  
35  
36  
37  
38  
39  
40  
41  
42  
43  
44  
45  
46  
47  
48  
49  
50  
51  
52  
53  
54  
55  
56  
57  
58  
59  
60

1 group, age, sex, and SF36v2 PCS. Stata v12<sup>39</sup> was used to generate five datasets using 10 switching  
2 procedures.

3  
4 Discounting was not carried out because the analysis was restricted to costs and outcomes over a  
5 period of less than a year. All analyses were conducted using Microsoft Excel and Stata v12.<sup>39</sup>

### 6 7 **Sensitivity Analyses**

8 We addressed three areas of uncertainty using one/two-way sensitivity analyses. First, we estimated  
9 the cost of running the PhysioDirect service if it was operating at full capacity. It is likely that this was  
10 not achieved during the trial because of: low demand due to exclusions and non-participation in the  
11 trial; inflexible staffing levels to ensure consistency throughout the trial period; and the 'one-way'  
12 system generally used, where physiotherapists waited for patients to call them but did not routinely  
13 contact patients themselves (notwithstanding some limited use of answer-machines). Data from the  
14 Bristol service, which continued to operate beyond the trial period and was then able to tailor  
15 staffing levels to demand, were used to estimate the cost of running a more 'efficient but feasible'  
16 PhysioDirect service once the trial had ended.

17  
18 The second area of uncertainty addressed hospital costs. Patients in the trial were recruited from  
19 primary care and for these, use of secondary care is infrequent but relatively expensive and this can  
20 have a disproportionate effect on mean total cost. We tested this by excluding hospital costs from  
21 the total.

22  
23 The third and fourth sensitivity analyses used the imputed missing data as described above first with  
24 data collected during the trial and second by combining with results of the first sensitivity analysis,  
25 mimicking an 'efficient but feasible' service.

26

1  
2  
3  
4  
5  
6  
7  
8  
9  
10  
11  
12  
13  
14  
15  
16  
17  
18  
19  
20  
21  
22  
23  
24  
25  
26  
27  
28  
29  
30  
31  
32  
33  
34  
35  
36  
37  
38  
39  
40  
41  
42  
43  
44  
45  
46  
47  
48  
49  
50  
51  
52  
53  
54  
55  
56  
57  
58  
59  
60

## 2 RESULTS

3 A total of 2,249 patients took part in the trial, 1506 allocated to PhysioDirect and 743 to usual care.

4 The mean age was 60, with slightly more females than males (60% vs 40%); they were  
5 overwhelmingly white (97%), just over half (60%) were employed and all but a few were referred for  
6 physiotherapy by their GP. Nearly all participants (2,223=99%) gave permission to access their GP  
7 notes to obtain data about primary care encounters and prescribed medication. 81% returned  
8 questionnaires at both 6 weeks and 6 months though not all participants completed all sections at  
9 both time points. We had complete NHS cost and QALY data for 840 (56%) PhysioDirect and 432  
10 (58%) usual care participants.

### 12 Resource use

13 Table 2 gives information about the different types of physiotherapy consultations by patients in  
14 each group. Of the 1506 patients in the PhysioDirect group, 39% (586) were managed solely over the  
15 telephone and only 46% (695) had any face-to-face consultations. In total, patients in the usual care  
16 group had, on average, 0.38 (95% CI: 0.12 to 0.63) more consultations than those in the PhysioDirect  
17 group and the mean total duration of all consultations was 20 minutes longer (95% CI: 12 to 28).

19 *Table 2 here*

21 Tables 3 and 4 give information about NHS and personal resource use. Just over a third of patients  
22 (35%) had a GP consultation during the 6 months and 40% received a prescription for  
23 musculoskeletal pain-related medication. There was very little difference between the two groups in  
24 terms of health care use and the only important difference in personal expenditure was travel to  
25 physiotherapy appointments.

1  
2  
3 1 *Tables 3 and 4 here*  
4  
5 2  
6  
7 3 **Costs and consequences**  
8  
9 4 Table 5 summarises the mean cost per patient, by group, for each category of cost. All available data  
10  
11 5 are included giving variable denominators for each category. Comparing the two groups, there are  
12  
13 6 small differences in cost in some categories but for most of these the confidence intervals indicate  
14  
15 7 there is no evidence of a difference between the groups.  
16  
17 8  
18  
19 9  
20 9 *Table 5 here*  
21  
22 10  
23  
24 11 Table 6 combines the results of the cost analysis with the full range of primary and secondary  
25  
26 12 outcomes, including QALYs.  
27  
28 13  
29  
30 14  
31 14 *Table 6 here*  
32  
33 15  
34  
35 16 Results are presented for all available data, with cost categories combined. Again, denominators  
36  
37 17 vary within the table and they also differ from those in table 5 because sub-categories have been  
38  
39 18 collapsed. There was no evidence of a difference in the primary clinical outcome (the SF36v2 PCS)  
40  
41 19 between the groups, suggesting that PhysioDirect led to similar outcomes as usual physiotherapy  
42  
43 20 care. Patients in the PhysioDirect group had their first assessment and telephone advice 27 days  
44  
45 21 earlier than those in the usual care group, however patient satisfaction was slightly lower in those  
46  
47 22 receiving PhysioDirect. QALYs were higher in the PhysioDirect group by 0.009, which equates to  
48  
49 23 about 3.3 extra days of full health over a year.  
50  
51 24  
52  
53  
54  
55 25 **Cost-utility analysis**  
56  
57  
58  
59  
60



1 The cost-utility analysis presented in Table 7 uses complete cases, that is, we include only those  
2 patients for whom we had complete NHS cost and QALY data: 432 (58%) from the usual care group  
3 and 840 (56%) from PhysioDirect. The small extra cost of caring for patients in the PhysioDirect  
4 group was compensated for by the extra QALY gain, giving an incremental cost-effectiveness ratio of  
5 £2,889. If society is willing to pay £20,000 per QALY<sup>23</sup> the net monetary benefit is £117 (95% CI -£96  
6 to £310) and there is 0.88 probability that the intervention is cost-effective. This is illustrated in the  
7 cost-effectiveness acceptability curve in figure 1.

8  
9 *Table 7 here*

10 *Figure 1 here*

## 11 **Sensitivity Analysis**

12 The results of the four sensitivity analyses are shown in table 8 and figure 2. Scenario (1) indicates  
13 the potential cost-effectiveness of a more efficient PhysioDirect service. During the trial PhysioDirect  
14 clinic opening hours, physiotherapists spent about 35% of their time on the phone or dealing with  
15 directly related administration; in Bristol after the trial, this was increased to 57%. Under this  
16 scenario, the cost per patient in the PhysioDirect group was £14.53 less than under trial conditions  
17 and £2.11 less per patient in the usual care group. The ICER is therefore lower, at £1,045, the NMB  
18 correspondingly higher at £127 ( $\lambda$ =£20,000). At low levels of  $\lambda$ , the probability of PhysioDirect being  
19 cost-effective under this scenario is higher than with the base case, though at  $\lambda$ =£20,000 it reaches a  
20 similar value (see figures 1 and 2).

21  
22 *Table 8 here*

23 *Figure 2 here*

1  
2  
3 1 The effect of removing hospital costs from the analysis is shown in sensitivity analysis (2). Hospital  
4  
5 2 costs accounted for 75% of all NHS costs yet only 19% (n=252) participants reported using any  
6  
7 3 secondary care. Hospital use was evenly divided between the two groups so removing these from  
8  
9 4 the analysis made very little difference to incremental analysis.  
10  
11 5  
12  
13 6 The effect of imputing missing NHS cost and QALY data is explored in sensitivity analysis (3). Using  
14  
15 7 these data the cost of the interventions is lower but this is offset by higher NHS costs, giving a higher  
16  
17 8 mean total cost in both groups, by £21.41 in the usual care group and £6.58 in the PhysioDirect  
18  
19 9 group. QALYs using imputed data are lower, by 0.005 in the usual care group and by 0.010 in the  
20  
21 10 PhysioDirect group. The net effect is a reduction of both incremental cost and incremental QALYs,  
22  
23 11 giving an ICER of £2,260. Uncertainty around the ICER is reduced, as seen by the flatter CEAC in  
24  
25 12 figure 2.  
26  
27  
28  
29 13  
30  
31 14 Sensitivity analysis (4) combines analyses (1) and (3) by using imputed cost data in the 'efficient  
32  
33 15 service' scenario. The results suggest a possible cost saving of £6.02 per patient; the probability that  
34  
35 16 the service is cost-effective at  $\lambda$ =£20,000 is 0.72.  
36  
37  
38  
39  
40  
41  
42  
43

## 42 **DISCUSSION**

### 44 **Statement of principal findings**

46 21 The results of this economic evaluation suggest that PhysioDirect services for patients with  
47  
48 22 musculoskeletal problems require careful management if they are to be a cost-effective alternative  
49  
50 23 to usual physiotherapy care. There was very little difference between the two groups in terms of  
51  
52 24 either outcomes or costs, and the finding that PhysioDirect is cost-effective is based on evidence  
53  
54 25 that it provides very slightly greater QALY benefits at very slightly greater cost.  
55  
56  
57  
58  
59  
60

1  
2  
3 1 Clearer cost savings were observed in the sensitivity analysis that replicated the post-trial service,  
4  
5 2 once greater flexibility in working arrangements was implemented. Without the restrictions of a trial  
6  
7 3 environment staffing was adjusted to meet the anticipated demand, a call-back service was  
8  
9 4 employed which accommodated fluctuations in activity during each session, referrals added to the  
10  
11 5 system were adjusted regularly to reflect actual staffing and the number of patients waiting for  
12  
13 6 a call-back and a higher throughput of patients led to greater economies of scale. These changes  
14  
15 7 ensured physiotherapists within the PhysioDirect service spent a higher proportion of their  
16  
17 8 PhysioDirect clinic time on the telephone with patients. There was no evidence of a difference  
18  
19 9 between PhysioDirect and usual care in cost to patients and their families, or to society through the  
20  
21 10 costs of lost production.  
22  
23  
24  
25  
26

## 27 **Strengths and weaknesses of the study**

28  
29 13 The study has a number of strengths. It is the first study assessing the cost-effectiveness of a  
30  
31 14 PhysioDirect service including a large sample of patients with a wide range of musculoskeletal  
32  
33 15 problems based across a number of locations.<sup>14</sup> It uses a rigorous study design and conforms to  
34  
35 16 CONSORT guidelines.<sup>40</sup> Follow up from participating patients was good, a high proportion of the  
36  
37 17 resource use data were collected from GP records, and there was collection of resource use  
38  
39 18 information outside of the main health service perspective. Nevertheless, there are also limitations.  
40  
41 19 The proportion of eligible individuals consenting to participate in the trial was only 50%.<sup>22</sup> Further, a  
42  
43 20 particular difficulty in conducting economic evaluation with new service developments is ensuring  
44  
45 21 that they are fully utilised.<sup>41</sup> Although there was a clear run-in period prior to data collection for the  
46  
47 22 trial (ranging from 4 to 12 weeks in each of the four sites), to ensure that services were operating as  
48  
49 23 well as they could, and a 2:1 randomisation ratio in favour of PhysioDirect was used, there was still  
50  
51 24 considerable underutilisation of the new service. This was ameliorated by including a more fully  
52  
53 25 utilised service within the sensitivity analysis. Finally, because the differences in both costs and  
54  
55 26 effects are small, there is still some uncertainty around the findings.  
56  
57  
58  
59  
60

1

**2 The meaning of the study and implications for policy makers**

3 If the aim of health services is to achieve maximum health gain from an investment in health care,  
4 then PhysioDirect has a high probability of being more cost-effective than usual physiotherapy care.  
5 This research also, however, suggests that it cannot be assumed that PhysioDirect will reduce costs,  
6 although it could potentially do so if PhysioDirect services are managed efficiently. Both the costs  
7 and cost-effectiveness of services will depend on the productivity of physiotherapist time. If  
8 physiotherapists are able to use most of their time dealing directly with patients during sessions  
9 when they are available on the telephone, then the service will be less costly. This is most likely to be  
10 achieved by operating a call-back service and/or by operating the service on a large scale to even out  
11 fluctuations in demand. Further efficiencies may also be achieved if these services are, in the future,  
12 provided in conjunction with direct access for patients (rather than following referral from another  
13 health care professional), given that patients who self-refer are likely to contact the service with  
14 musculoskeletal problems of shorter duration,<sup>42</sup> and such patients may be particularly appropriate  
15 for the initial assessment and advice provided by a PhysioDirect service. More generally, the study  
16 has broader implications for telephone services, particularly around the implicit assumption that  
17 such services will inevitably be money saving. Here this assumption was found to be false, largely  
18 because the physiotherapists' time was underutilised during PhysioDirect clinic hours. Thus, for all  
19 such services, it will be important for policy makers to ensure that easy assumptions about the costs  
20 of these services are properly assessed in relation to factors such as how efficiently the service is  
21 run, and what proportion of patients are subsequently invited for face to face care following an  
22 initial telephone call.

23

**24 Unanswered questions and future research**

25 As services evolve, further research should explore the costs and benefits of PhysioDirect under  
26 different scenarios. These might include: comparing different skill levels of staff operating the

27

28

29

30

31

32

1  
2  
3 1 service; the inclusion of patient self-referrals in addition to GP referrals; the use, or otherwise, of  
4  
5 2 computerised support in assessing the patient; the extension to internet services (possibly combined  
6  
7 3 with cameras);<sup>43</sup> and the use of mobile 'smartphone' technology, for example in rapid assessment of  
8  
9 4 musculoskeletal injuries. In particular, however, it will be important to assess the costs and benefits  
10  
11 5 of services once they are more established and provided on a wider scale. The costs and benefits of  
12  
13 6 telehealth more generally need further exploration in relation to their cost effectiveness particularly  
14  
15 7 given the negative findings of the Whole Systems Demonstrator project evaluating telehealth  
16  
17 8 support and treatment for patients with long term conditions.<sup>44</sup> It would be helpful to identify those  
18  
19 9 characteristics that are likely to make services both more cost-effective and less costly.  
20  
21  
22  
23  
24  
25  
26  
27  
28  
29  
30  
31  
32  
33  
34  
35  
36  
37  
38  
39  
40  
41  
42  
43  
44  
45  
46  
47  
48  
49  
50  
51  
52  
53  
54  
55  
56  
57  
58  
59  
60

## References

1. Munro J, Nicholl J, O'Cathain A et al. Impact of NHS Direct on demand for immediate care: observational study. *Br Med J* 2000;321:150-153.
2. Lattimer V, Sassi F, George S et al. Cost analysis of nurse telephone consultation in out of hours primary care: evidence from a randomised controlled trial. *Br Med J* 2000;320:1053-1057.
3. Lattimer V, George S, Thompson F et al. Safety and effectiveness of nurse telephone consultation in out of hours primary care: randomised controlled trial. The South Wiltshire Out of Hours Project (SWOOP) Group. *Br Med J* 1998;317:1054-1059.
4. Pinnock H, Bawden R, Proctor S et al. Accessibility, acceptability, and effectiveness in primary care of routine telephone review of asthma: pragmatic, randomised controlled trial. *Br Med J* 2003;326:477-479.
5. Bunn F, Byrne G, Kendall S. Telephone consultation and triage: effects on health care use and patient satisfaction. *Cochrane Database of Systematic Reviews*.(4):CD004180, 2004. 2004;CD004180.
6. McKinstry B, Watson P, Pinnock H et al. Telephone consulting in primary care: a triangulated qualitative study of patients and providers. *Br J Gen Pract* 2009;59:e209-e218.
7. Picavet HS, Schouten JS. Musculoskeletal pain in the Netherlands: prevalences, consequences and risk groups, the DMC(3)-study. *Pain* 2003;102:167-178.
8. Jordan K, Ong BN, Croft P. Previous consultation and self reported health status as predictors of future demand for primary care. *J Epidemiol Commun Health* 2003;57:109-113.
9. McKormick A, Fleming D, and Charlton J *Morbidity statistics from general practice. Fourth national study 1991-1992 Serise MB5 no.3*. London: 1995.

- 1  
2  
3 10. Andersson GB. Epidemiological features of chronic low-back pain. *Lancet* 1999; 354: 581-585.
- 4  
5  
6 11. Maniadakis N, Gray A. The economic burden of back pain in the UK. *Pain* 2000;84:95-103.
- 7  
8  
9 12. National Institute for Health and Clinical Excellence *Low back pain: early management of*  
10 *persistent non-specific low back pain. NICE clinical guideline 88.* 2009.
- 11  
12  
13 13. Department of Health. Physiotherapy Services Summary Information for 2004-2005, England  
14 [http://www.hscic.gov.uk/searchcatalogue?productid=4306&kwd=K&gran=Government+Office+](http://www.hscic.gov.uk/searchcatalogue?productid=4306&kwd=K&gran=Government+Office+Regions&sort=Relevance&size=10&page=1#top)  
15 [Regions&sort=Relevance&size=10&page=1#top](http://www.hscic.gov.uk/searchcatalogue?productid=4306&kwd=K&gran=Government+Office+Regions&sort=Relevance&size=10&page=1#top) (accessed 10.06.2013)
- 16  
17  
18  
19  
20  
21 14. Salisbury C, Montgomery AA, Hollinghurst S et al. Effectiveness of PhysioDirect telephone  
22 assessment and advice services for patients with musculoskeletal problems: pragmatic  
23 randomised controlled trial. *Br Med J* 2013;346:f43.
- 24  
25  
26  
27  
28 15. Hodgson K. Kidderminster helpline proves a success. *Physiotherapy Frontline* 2001;7:22-23.
- 29  
30  
31  
32 16. Taylor S, Ellis I, and Gallagher M. Patient satisfaction with a new physiotherapy telephone  
33 service for back pain patients. *Physiotherapy* 2002;88:645-657.
- 34  
35  
36  
37 17. Clayson M and Woolvine M. Back pain direct clinic: a collaboration between general  
38 practitioners and physiotherapists. *Work Based Learning in Primary Care* 2004;2:38-43.
- 39  
40  
41  
42 18. Turner D. An exploratory study of physiotherapy telephone assessment. *International Journal of*  
43 *Therapy and Rehabilitation* 2009;16:97-105.
- 44  
45  
46  
47 19. Russell T, Truter P, Blumke R, Richardson B. The diagnostic accuracy of telerehabilitation for  
48 nonarticular lower-limb musculoskeletal disorders. *Telemed J & E-Health* 2010;16:585-594.
- 49  
50  
51  
52  
53 20. Patel S, Hossain FS, Colaco HB et al. The accuracy of primary care teams in diagnosing disorders  
54 of the shoulder. *J Eval Clin Pract* 2011;17:118-122.
- 55  
56  
57  
58  
59  
60

- 1  
2  
3 21. Jette DU, Ardleigh K, Chandler K et al. Decision-making ability of physical therapists: physical  
4 therapy intervention or medical referral. *Phys Ther* 2006;86:1619-1629.  
5  
6  
7  
8 22. Salisbury C, Foster NE, Hopper C et al. A pragmatic randomised controlled trial of the  
9 effectiveness and cost-effectiveness of 'PhysioDirect' telephone assessment and advice services  
10 for physiotherapy. *Health Technology Assessment (Winchester, England)* /20;17:1-157.  
11  
12  
13 23. National Institute for Health and Clinical Excellence. Guide to the Methods of Technology  
14 Appraisal <http://www.nice.org.uk/media/B52/A7/TAMethodsGuideUpdatedJune2008.pdf>  
15 (accessed 10.06.2013)  
16  
17  
18 24. Brooks R, with the EuroQol Group. EuroQol: the current state of play. *Health Policy* 1996;53-72.  
19  
20  
21 25. Dolan P, Gudex C, Kind P et al. *A social tariff for EuroQol: Results from a UK general population*  
22 *survey*. University of York, 1-9-1995.  
23  
24  
25 26. Quality Metric. A community for measuring health outcomes using SF tools. [http://www.sf-](http://www.sf-36.org/)  
26 [36.org/](http://www.sf-36.org/) (accessed 10.06.2013)  
27  
28  
29 27. Paterson, C. Measuring outcomes in primary care: a patient generated measure, MYMOP,  
30 compared with the SF-36 survey. *Br Med J* 1996;312:1016-1020.  
31  
32  
33 28. Pham T, Van Der Heijde D, Lassere M et al. Outcome variables for osteoarthritis clinical trials:  
34 The OMERACT-OARSI set of responder criteria. *J Rheumatol* 2003;30:1648-1654.  
35  
36  
37 29. British National Formulary. British National Formulary. <http://www.bnf.org/bnf> (accessed  
38 10.06.2013)  
39  
40  
41  
42 30. Curtis L. *Unit costs of health and social care 2009*. PSSRU, University of Kent, 2010.  
43  
44  
45  
46  
47  
48  
49  
50  
51  
52  
53  
54  
55  
56  
57  
58  
59  
60



- 1  
2  
3 31. Department of Health. NHS Reference costs 2009-2010.  
4  
5 <https://www.gov.uk/government/publications/nhs-reference-costs-2009-2010> (accessed  
6  
7 10.06.2013)  
8  
9
- 10  
11 32. National Health Service. NHS Drug tariff.  
12  
13 <http://www.nhsbsa.nhs.uk/PrescriptionServices/924.aspx> (accessed 10.06.2013)  
14
- 15  
16 33. The Automobile Association. The AA schedule of motoring costs.  
17  
18 [http://www.theaa.com/motoring\\_advice/running\\_costs/index.html](http://www.theaa.com/motoring_advice/running_costs/index.html) (accessed 10.06.2013)  
19
- 20  
21 34. Office for National Statistics. Annual survey of hours and earnings 2009  
22  
23 [http://www.ons.gov.uk/ons/rel/ashe/annual-survey-of-hours-and-earnings/2009-](http://www.ons.gov.uk/ons/rel/ashe/annual-survey-of-hours-and-earnings/2009-revised/index.html)  
24  
25 [revised/index.html](http://www.ons.gov.uk/ons/rel/ashe/annual-survey-of-hours-and-earnings/2009-revised/index.html) (accessed 10.06.2013)  
26  
27
- 28  
29 35. Royal College of Nursing. Agenda for change – pay rates [http://www.nhscareers.nhs.uk/working-](http://www.nhscareers.nhs.uk/working-in-the-nhs/pay-and-benefits/agenda-for-change-pay-rates)  
30  
31 [in-the-nhs/pay-and-benefits/agenda-for-change-pay-rates](http://www.nhscareers.nhs.uk/working-in-the-nhs/pay-and-benefits/agenda-for-change-pay-rates) (accessed 10.06.2013)  
32  
33
- 34  
35 36. Scott A, Simoens S, Heaney D, et al. What does GP out of hours care cost? An analysis of  
36  
37 different models of out of hours care in Scotland. *Scot Med J* 2004;49:61-66.  
38
- 39  
40 37. Manca A, Hawkins N, Sculpher M. Estimating mean QALYs in trial-based cost-effectiveness  
41  
42 analysis: the importance of controlling for baseline utility. *Health Econ* 2005;14:487-496.  
43
- 44  
45 38. van Buuren S, Boshuizen HC, Knook D L. Multiple Imputation of missing blood pressure  
46  
47 covariates in survival analysis. *Stat Med* 1999;18:681-694:  
48
- 49  
50 39. StataCorp *Statistical Software: Release 11*. College Station, TX: StataCorp LP. 2009.  
51
- 52  
53 40. The CONSORT Group. CONSORT: the transparent reporting of trials [http://www.consort-](http://www.consort-statement.org)  
54  
55 [statement.org](http://www.consort-statement.org) (accessed 10.06.2013)  
56  
57  
58  
59  
60

- 1  
2  
3 41. Coast J, Hensher M, Mulligan J, et al. Conceptual and practical difficulties with the economic  
4  
5 evaluation of health services developments. *J Health Serv Res Policy* 2000;5:42-48.  
6  
7  
8 42. Leemrijse CJ, Swinkels IC, Veenhof C. Direct access to physical therapy in the Netherlands: results  
9  
10 from the first year in community-based physical therapy. *Phys Ther.* 2008 88(8):936-46  
11  
12  
13 43. Li LC, Townsend AF, Badley EM. Self-management interventions in the digital age: new  
14  
15 approaches to support people with rheumatologic conditions. *Best Pract Res Clin Rheumatol.* 2012  
16  
17 26(3):321-33.  
18  
19  
20  
21 44. Henderson C, Knapp M, Fernandez J-L. Cost effectiveness of telehealth for patients with long  
22  
23 term conditions (Whole Systems Demonstrator telehealth questionnaire study): nested economic  
24  
25 evaluation in a pragmatic, cluster randomised controlled trial. *Br Med J* 2013;34  
26  
27  
28  
29  
30  
31  
32  
33  
34  
35  
36  
37  
38  
39  
40  
41  
42  
43  
44  
45  
46  
47  
48  
49  
50  
51  
52  
53  
54  
55  
56  
57  
58  
59  
60

1  
2  
3 **1 Competing interestes**

4 We have read and understood the BMJ Group policy on declaration of interests and declare the  
5 following interests: none.  
6  
7

8 **4 Funding**

9 The research was funded by the Medical Research Council (MRC) and managed by the National  
10 Institute for Health Research (NIHR) on behalf of the MRC-NIHR partnership. The funder had no role  
11 in: the study design; the collection, analysis, or interpretation of data; the writing of the report; the  
12 decision to submit the paper for publication. The researchers are all independent of the funders. All  
13 researchers had access to all the data.  
14  
15  
16  
17

18  
19 Nadine Foster is supported by a National Institute for Health Research NIHR Research Professorship  
20 NIHR-RP-011-015. The views expressed in this publication are those of the authors and not  
21 necessarily those of the NHS, the National Institute for Health Research or the Department of  
22 Health.  
23  
24

25 **15 Aurthors' contributions**

26 CS was principal investigator on the trial, SH took the lead on the economic evaluation. JC, NF, SG,  
27 JH, and AM were co-applicants and contributed to the conception and design. SH, JC and JB carried  
28 out the analysis with help from CS and AM, and all authors contributed to the interpretation of the  
29 data. SH and JC wrote the first draft of the paper with all authors contributing to subsequent  
30 revisions. All authors have seen and approved the final version.  
31  
32  
33  
34

35 **21 Acknowledgments**

36 We would like to thank the patients who contributed to this research; the physiotherapists,  
37 administrative staff, managers and commissioners who supported the set up and delivery of the trial  
38 in the four primary care trusts; participating general practices; the research support staff in Bristol  
39 and Keele; members of the Trial Steering Committee and Data Monitoring Committee; and Jill  
40 Gamlin and Nick Deane who developed the PhysioDirect assessment algorithms and software used  
41 in this trial.  
42  
43  
44  
45  
46

47 **28 Data sharing**

48 The datasets will be made freely available on application to any bone-fide suitable qualified  
49 researcher upon submission of a protocol which provides a research question and research design  
50 which could be addressed by the data from this study, has been peer reviewed and received  
51 ethical and research governance approvals. Users of the data will also be subject to a written  
52 agreement which complies with the MRC guidance. Data will be made available for sharing only  
53 after the publication of the final project report and the main papers in peer reviewed journals.  
54  
55

56 29

57 30

58

59

60

Table 1: Data sources and unit costs

|                                                | Unit cost (£)                                                          |
|------------------------------------------------|------------------------------------------------------------------------|
| <b>Primary and Community Care<sup>30</sup></b> |                                                                        |
| General Practitioner                           |                                                                        |
| Surgery                                        | 27.00                                                                  |
| Telephone consultation                         | 16.00                                                                  |
| Home visit                                     | 91.00                                                                  |
| Practice nurse                                 |                                                                        |
| Surgery                                        | 10.00                                                                  |
| Telephone consultation                         | 5.93                                                                   |
| Health Care Assistant/phlebotomist             |                                                                        |
| Surgery                                        | 6.92                                                                   |
| District Nurse                                 |                                                                        |
| Home visit                                     | 16.33                                                                  |
| <b>Out of Hours<sup>41</sup></b>               |                                                                        |
| General practitioner                           | 23.50                                                                  |
| <b>Hospital care<sup>31</sup></b>              |                                                                        |
| A&E                                            | 103.00                                                                 |
| Outpatient visits                              | By Healthcare Resource Group,<br>differentiated by first and follow-up |
| Inpatient stays                                | By Healthcare Resource Group                                           |
| <b>Prescribed medication<sup>29</sup></b>      | per item, by name, strength and amount                                 |
| <b>Mileage<sup>33</sup></b>                    | 0.4612                                                                 |
| <b>Time off work<sup>34</sup></b>              | Median national wage by age and sex                                    |

Table 2: Number of physiotherapy consultations and mean duration, by type and group

|                                   |                    | Usual care (n=743) | PhysioDirect (n=1506) |
|-----------------------------------|--------------------|--------------------|-----------------------|
| <b>Face-to-face appointments</b>  | mean (SD) number   | 3.11(2.63)         | 1.91(2.72)            |
|                                   | mean (SD) total    | 107.51(88.92)      | 64.20(89.31)          |
|                                   | duration (minutes) |                    |                       |
| <b>Telephone appointments</b>     | mean (SD) number   | 0.13(0.44)         | 0.96 (0.63)           |
|                                   | mean (SD) total    | 4.21(14.64)        | 27.37(19.92)          |
|                                   | duration (minutes) |                    |                       |
| <b>Home visits</b>                | mean (SD) number   | 0.00 (0.06)        | 0.00 (0.06)           |
|                                   | mean (SD) total    | 0.14(2.27)         | 0.12(2.12)            |
|                                   | duration (minutes) |                    |                       |
| <b>All physiotherapy contacts</b> | mean (SD) number   | 3.25(2.70)         | 2.87(2.94)            |
|                                   | mean (SD) total    | 111.86(90.50)      | 91.70 (95.40)         |
|                                   | duration (minutes) |                    |                       |

Table 3: Health services resource use, by group. All available data.

|                                                 | Mean (SD) number of consultations |                   |             |                    |
|-------------------------------------------------|-----------------------------------|-------------------|-------------|--------------------|
|                                                 | n                                 | usual care        | n           | PhysioDirect       |
| GP consultations                                | 739                               | 0.77(1.47)        | 1484        | 0.87 (1.68)        |
| Nurse consultations                             | 739                               | 0.04 (0.22)       | 1484        | 0.06 (0.32)        |
| Other primary care consultations                | 739                               | 0.02(0.14)        | 1484        | 0.02 (0.17)        |
| <b>Total number of primary care contacts</b>    | <b>739</b>                        | <b>0.83(1.56)</b> | <b>1484</b> | <b>0.96 (1.84)</b> |
| Number of prescriptions                         | 728                               | 1.36 (2.73)       | 1469        | 1.68 (3.72)        |
| A&E (visits)                                    | 467                               | 0.02 (0.01)       | 912         | 0.03 (0.01)        |
| Out-patient (consultations)                     | 467                               | 0.17 (0.83)       | 910         | 0.35 (1.03)        |
| In-patient stays (Finished Consultant Episodes) | 465                               | 0.01 (0.10)       | 910         | 0.01 (0.10)        |

**Table 4: Patient and societal resource use, by group. All available data.**

| <b>Number (%) reporting:</b>                      | <b>n</b> | <b>usual care</b> | <b>n</b> | <b>PhysioDirect</b> |
|---------------------------------------------------|----------|-------------------|----------|---------------------|
| Expenditure on travel to physiotherapy            | 462      | 242 (52.4)        | 1232     | 308 (25.8)          |
| Expenditure on travel to primary care             | 669      | 116 (17.3)        | 1337     | 237 (17.7)          |
| Expenditure on over-the-counter medication        | 506      | 256 (50.6)        | 1028     | 512 (49.8)          |
| Expenditure on prescriptions                      | 559      | 264 (47.2)        | 1085     | 508 (46.8)          |
| Expenditure on private therapy                    | 484      | 89 (18.4)         | 934      | 167 (17.9)          |
| Equipment purchase                                | 480      | 139 (29.0)        | 939      | 233 (24.8)          |
| Payments for extra domestic help                  | 459      | 35 (7.6)          | 928      | 76 (8.2)            |
| Loss of earnings                                  | 598      | 30 (5.5)          | 1209     | 64 (5.3)            |
| Any time off to attend physiotherapy consultation | 692      | 218 (31.5)        | 1416     | 380 (26.8)          |
| Work has been affected because of condition       | 477      | 141 (29.6)        | 959      | 317 (33.1)          |

Table 5: Mean total cost per patient, by group and category. All available data<sup>a</sup>.

|                                            |            | usual care              |             |                         | Incremental difference            |
|--------------------------------------------|------------|-------------------------|-------------|-------------------------|-----------------------------------|
|                                            | n          | mean (SD) cost          | n           | mean (SD) cost          | (95% Confidence Interval)         |
| <b>Physiotherapy services</b>              |            |                         |             |                         |                                   |
| Face-to-face appointments                  | 743        | £64.42 (£53.00)         | 1506        | £38.76 (£53.92)         | -£25.66 (-£30.37 to -£20.95)      |
| Telephone appointments                     | 743        | £5.22 (£18.01)          | 1506        | £35.17 (£26.34)         | £29.94 (£27.84 to £32.05)         |
| Home visits                                | 743        | £0.08 (£1.33)           | 1506        | £0.08 (£1.46)           | £0.00 (-£0.12 to £0.13)           |
| <b>Total physiotherapy cost</b>            | <b>743</b> | <b>£69.73 (£56.17)</b>  | <b>1506</b> | <b>£74.01 (£63.97)</b>  | <b>£4.28 (-£1.12 to £9.69)</b>    |
| <b>Primary care services</b>               |            |                         |             |                         |                                   |
| GP consultations                           | 739        | £19.21 (£35.91)         | 1484        | £21.69 (£41.66)         | £2.48 (-£1.04 to £6.00)           |
| Nurse consultations                        | 739        | £0.44 (£2.37)           | 1484        | £0.61 (£3.17)           | £0.16 (-£0.10 to £0.42)           |
| Other primary care consultations           | 739        | £0.03 (£0.57)           | 1484        | £0.07 (£1.31)           | £0.05 (-£0.05 to £0.15)           |
| <b>Total primary care cost</b>             | <b>739</b> | <b>£19.68 (£36.68)</b>  | <b>1484</b> | <b>£22.37 (£42.83)</b>  | <b>£2.69 (-£0.92 to £6.30)</b>    |
| <b>Medication cost</b>                     | <b>728</b> | <b>£11.04 (£51.61)</b>  | <b>1469</b> | <b>£10.33 (£55.43)</b>  | <b>-£0.72 (-£5.53 to £4.10)</b>   |
| <b>Hospital services</b>                   |            |                         |             |                         |                                   |
| A&E                                        | 467        | £1.99 (£17.12)          | 912         | £3.17 (£20.84)          | £1.18 (-£1.01 to £3.37)           |
| Out-patient                                | 467        | £30.74 (£98.36)         | 910         | £38.35 (£126.05)        | £7.61 (-£5.50 to £20.72)          |
| In-patient                                 | 465        | £51.02 (£520.48)        | 910         | £34.99 (£399.62)        | -£16.03 (-£65.70 to £33.64)       |
| <b>Total hospital cost</b>                 | <b>459</b> | <b>£83.04 (£561.68)</b> | <b>899</b>  | <b>£77.00 (£446.24)</b> | <b>-£6.04 (-£60.99 to £48.91)</b> |
| <b>Personal expenditure</b>                |            |                         |             |                         |                                   |
| Cost of all calls to physiotherapy service | 743        | £0.97 (£0.99)           | 1506        | £1.75 (£1.29)           | £0.79 (£0.68 to £0.89)            |
| Travel to physiotherapy                    | 462        | £6.11 (£11.48)          | 1232        | £3.11 (£8.51)           | -£3.01 (-£4.01 to -£2.00)         |
| Travel for primary care                    | 669        | £0.65 (£2.93)           | 1337        | £0.75 (£4.10)           | £0.11 (-£0.24 to £0.45)           |
| Over-the-counter medication                | 490        | £7.67 (£14.09)          | 987         | £8.61 (£22.38)          | £0.94 (-£1.23 to £3.11)           |



|                                             |     |                    |      |                    |                               |
|---------------------------------------------|-----|--------------------|------|--------------------|-------------------------------|
| Cost of prescriptions                       | 553 | £2.72 (£8.95)      | 1076 | £2.67 (£8.33)      | -£0.05 (-£0.93 to £0.82)      |
| Private therapy                             | 475 | £21.98 (£70.34)    | 915  | £39.34 (£296.94)   | £17.36 (-£9.76 to £44.48)     |
| Equipment purchase                          | 473 | £17.16 (£169.12)   | 924  | £9.12 (£56.42)     | -£8.04 (-£20.08 to £4.00)     |
| Extra domestic help                         | 451 | £10.93 (£64.31)    | 905  | £13.68 (£96.02)    | £2.75 (-£7.07 to £12.56)      |
| Cost associated with loss of earnings       | 598 | £46.69 (409.72)    | 1209 | £82.78 (£885.85)   | £36.09 (-£38.63 to £110.81)   |
| <b>Value of time off work</b>               |     |                    |      |                    |                               |
| Time off work to attend physiotherapy       | 598 | £12.90 (£38.99)    | 1211 | £11.91 (£57.86)    | £0.95 (-£3.81 to £5.70)       |
| Time off work associated with the condition | 452 | £265.92 (£1350.82) | 884  | £226.61 (£1139.84) | £111.31 (-£159.04 to £379.67) |

<sup>a</sup> Uses all available data, so denominators differ by category.

Table 6: Cost-consequences. All available data<sup>a</sup>.

|                                                  | n (%)     | usual care                 | n (%)      | PhysioDirect             | Incremental difference<br>(95% Confidence<br>Interval)                     |
|--------------------------------------------------|-----------|----------------------------|------------|--------------------------|----------------------------------------------------------------------------|
| <b>Mean (SD) Cost</b>                            |           |                            |            |                          |                                                                            |
| Total physiotherapy cost                         | 743       | £69.73 (£56.17)            | 1506       | £74.01<br>(£63.97)       | £4.28<br>(-£1.12 to £9.69)                                                 |
| Cost of NHS services including<br>physiotherapy  | 453 (61%) | £189.19<br>(£557.61)       | 888 (59%)  | £196.43<br>(£472.02)     | £7.24<br>(-£49.68 to £64.10)                                               |
| Total personal expenditure                       | 310 (42%) | £121.10<br>(£571.15)       | 714 (47%)  | £166.40<br>(£1040.27)    | £45.30<br>(-£78.01 to £168.61)                                             |
| Total value of all time off<br>work <sup>b</sup> | 451 (61%) | £276.75<br>(£1355.00)      | 883 (59%)  | £240.74<br>(£1147.20)    | -£36.01<br>(-£174.69 to £102.66)                                           |
| <b>Consequences<sup>c</sup></b>                  |           |                            |            |                          |                                                                            |
|                                                  |           |                            |            |                          | <b>Difference/odds ratio<br/>(95% confidence<br/>interval)<sup>d</sup></b> |
| SF36v2 PCS                                       | 629 (85%) | 44.18 (10.84)              | 1283 (85%) | 43.50 (10.94)            | -0.01 (-0.80 to 0.79)                                                      |
| MYMOP <sup>e</sup>                               | 518 (70%) | 2.40 (1.38)                | 1033 (69%) | 2.40 (1.43)              | -0.02 (-0.16 to 0.11)                                                      |
| Global improvement score                         | 501 (67%) | 4.07 (1.40)                | 1001 (66%) | 4.01 (1.44)              | -0.08 (-0.23 to 0.08)                                                      |
| Response to treatment<br>(OMERACT OARSI)         | 510 (69%) | 197 (38.6%)                | 1029 (68%) | 430 (41.8%)              | 1.14 (0.92 to 1.43)                                                        |
| Waiting time to first<br>assessment and advice   | 618 (83%) | 34 (20 to 55) <sup>f</sup> | 1281 (85%) | 7 (4 to 15) <sup>f</sup> | 0.32 (0.29 to 0.35) <sup>g</sup>                                           |
| Patient overall satisfaction                     | 367 (49%) | 79.7 (26.5)                | 739 (49%)  | 75.9 (28.3)              | -3.8 (-7.3 to -0.3)                                                        |
| QALYs <sup>h</sup>                               | 454 (61%) | 0.322 (0.079)              | 881 (58%)  | 0.331 (0.082)            | 0.009 (-0.000 to 0.018)                                                    |

<sup>a</sup> Uses all available data, so denominators differ by category

<sup>b</sup> Total of time off to attend physiotherapy and associated with the condition

<sup>c</sup> At 6 month follow-up time point

<sup>d</sup> Adjusted for outcome at baseline, gender, age, referral problem, PCT

<sup>e</sup> Lower score is better

<sup>f</sup> Median (IQR)

<sup>g</sup> Accelerated failure time analysis

<sup>h</sup> Adjusted for outcome at baseline

**Table 7: Cost-effectiveness analysis.** Includes cases with complete data on NHS costs and QALYs

|                                                                            | n   | usual care<br>mean (SD) cost | n   | PhysioDirect<br>Mean (SD) cost | Incremental difference<br>(95% CI) |
|----------------------------------------------------------------------------|-----|------------------------------|-----|--------------------------------|------------------------------------|
| <b>Cost of physiotherapy</b>                                               | 432 | £78.77 (£57.08)              | 840 | £86.75 (£65.47)                | £7.98 (£0.69 to £15.27)            |
| <b>Cost of NHS services other than<br/>physiotherapy</b>                   | 432 | £100.91 (£502.02)            | 840 | £112.23 (£476.91)              | £11.32 (-£45.08 to £67.72)         |
| <b>Total cost including physiotherapy</b>                                  | 432 | £179.68 (£504.73)            | 840 | £198.98 (482.12)               | £19.30 (-£37.60 to £76.19)         |
| <b>QALYs</b>                                                               | 432 | 0.325 (0.077)                | 840 | 0.332 (0.081)                  | 0.007 (-0.003 to 0.016)            |
| <b>Incremental cost-effectiveness ratio (ICER)</b>                         |     |                              |     |                                | £2,889                             |
| <b>Median Net Monetary Benefit (95% CI) based on bootstrapped results:</b> |     |                              |     |                                |                                    |
| <b>λ=£20,000</b>                                                           |     |                              |     |                                | £117 (-£86 to £310)                |
| probability of intervention being cost-effective                           |     |                              |     |                                | 0.88                               |
| <b>λ=£30,000</b>                                                           |     |                              |     |                                | £184 (-£106 to £461)               |
| probability of intervention being cost-effective                           |     |                              |     |                                | 0.90                               |

Table 8: Sensitivity Analysis

|                                                                                  | n   | Usual care<br>mean (SD) | n    | PhysioDirect<br>mean (SD) | Incremental difference (95%<br>confidence interval) |
|----------------------------------------------------------------------------------|-----|-------------------------|------|---------------------------|-----------------------------------------------------|
| <b>(1) mimicking an efficient service</b>                                        |     |                         |      |                           |                                                     |
| Cost of physiotherapy                                                            | 432 | £76.56 (£55.34)         | 840  | £72.22 (£61.55)           | -£4.34 (-£11.25 to £2.57)                           |
| Cost of NHS services                                                             | 432 | £100.91 (£502.02)       | 840  | £112.23 (476.91)          | £11.32 (-£45.08 to £67.72)                          |
| Total cost                                                                       | 432 | £177.46 (£504.49)       | 840  | £184.44 (£481.83)         | £6.98 (-£49.89 to £63.85)                           |
| Incremental cost-effectiveness ratio (ICER)                                      |     |                         |      |                           | £1,045                                              |
| Median Net Monetary Benefit (95% CI) based on bootstrapped results:<br>λ=£20,000 |     |                         |      |                           | £127 (-£74 to £319)                                 |
| λ=£30,000                                                                        |     |                         |      |                           | £193 (-£95 to £473)                                 |
| <b>(2) Excluding hospital costs</b>                                              |     |                         |      |                           |                                                     |
| Cost of physiotherapy                                                            | 448 | £78.49 (£57.14)         | 869  | £86.84 (£65.25)           | £8.35 (£1.21 to £15.50)                             |
| Cost of NHS services excluding<br>secondary care                                 | 448 | £33.75 (£76.46)         | 869  | £33.49 (£63.76)           | -£0.25 (-£8.05 to £7.54)                            |
| Total cost of NHS services<br>including physiotherapy                            | 448 | £112.23 (£99.621)       | 869  | £120.33 (£98.85)          | £8.10 (-£3.21 to £19.41)                            |
| Incremental cost-effectiveness ratio (ICER)                                      |     |                         |      |                           | £1,084                                              |
| Median Net Monetary Benefit (95% CI) based on bootstrapped results:<br>λ=£20,000 |     |                         |      |                           | £142 (-£41 to £324)                                 |
| λ=£30,000                                                                        |     |                         |      |                           | £217 (-£56 to £489)                                 |
| <b>(3) Imputed data</b>                                                          |     |                         |      |                           |                                                     |
| Cost of physiotherapy                                                            | 743 | £69.73 (£56.17)         | 1506 | £74.01 (£63.97)           | £4.28 (-£1.12 to £9.69)                             |
| Cost of NHS services                                                             | 743 | £131.37 (£465.49)       | 1506 | £131.51 (£384.36)         | £0.17 (-£36.13 to £36.48)                           |
| Total cost of NHS services<br>including physiotherapy                            | 743 | £201.09 (£467.51)       | 1506 | £205.55 (£390.04)         | £4.46 (-£32.22 to £41.14)                           |
| Quality Adjusted Life Years                                                      | 743 | 0.320 (0.003)           | 1506 | 0.322 (0.002)             | 0.002 (-0.006 to 0.009)                             |

Incremental cost-effectiveness ratio (ICER) £2,260

Median Net Monetary Benefit (95% CI) based on bootstrapped results:

λ=£20,000 £34 (-£119 to £193)

λ=£30,000 £52 (-£172 to £285)

**(4) Imputed data and 'efficient' service**

Cost of physiotherapy 743 £67.61 (£54.19) 1506 £61.41 (£59.13) -£6.20 (-£11.26 to -£1.14)

Cost of NHS services 743 £131.37 (£465.49) 1506 £131.54 (384.36) £0.17 (-£36.13 to £36.48)

Total cost of NHS services 743 £198.98 (£467.48) 1506 £192.95 (£389.52) -£6.02 (-£42.68 to £30.63)

including physiotherapy

Quality Adjusted Life Years 743 0.320 (0.003) 1506 0.322(0.002) 0.002 (-0.006 to 0.009)

Incremental cost-effectiveness ratio (ICER) -£3,054

Median Net Monetary Benefit (95% CI) based on bootstrapped results:

λ=£20,000 £47 (-£113 to £202)

λ=£30,000 £67 (-£165 to £293)

Figure 1. Cost-effectiveness acceptability curve showing the probability that the intervention is cost-effective at different levels of willingness to pay for one Quality Adjusted Life Year

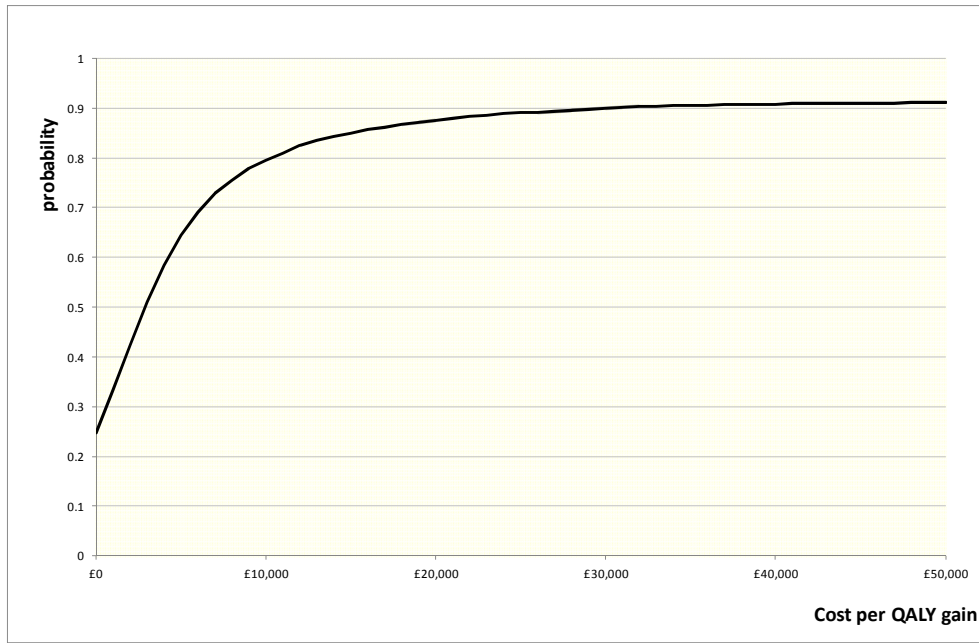

Figure 2. Cost-effectiveness acceptability curve showing the probability that the intervention is cost-effective at different levels of willingness to pay for one Quality Adjusted Life Year: Sensitivity Analyses

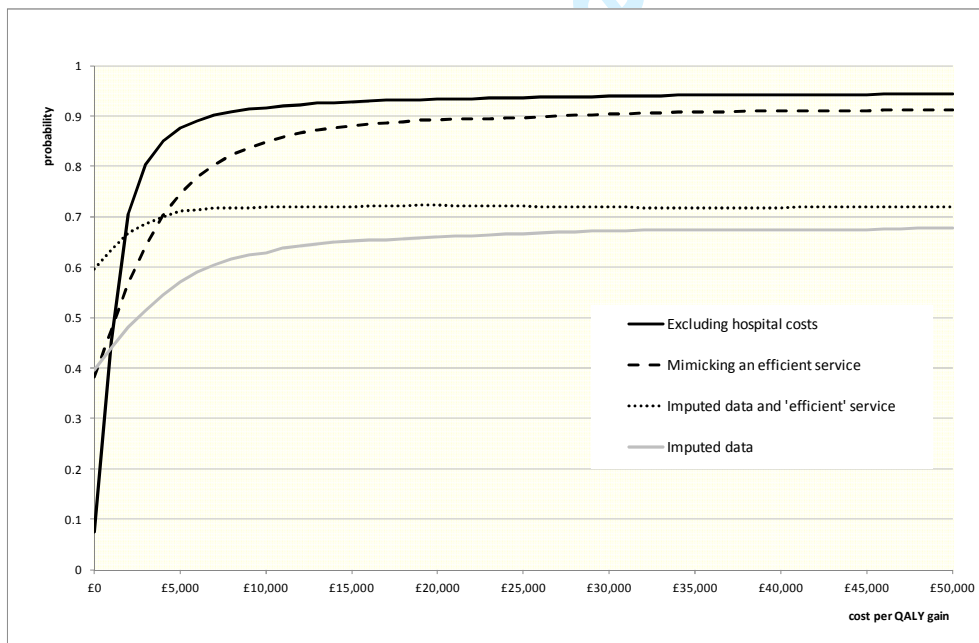

## CHEERS checklist—Items to include when reporting economic evaluations of health interventions

| Section/item                    | Item No | Recommendation                                                                                                                                                                             | Reported on page No/line No |
|---------------------------------|---------|--------------------------------------------------------------------------------------------------------------------------------------------------------------------------------------------|-----------------------------|
| <b>Title and abstract</b>       |         |                                                                                                                                                                                            |                             |
| Title                           | 1       | Identify the study as an economic evaluation or use more specific terms such as “cost-effectiveness analysis”, and describe the interventions compared.                                    | 1/1-3                       |
| Abstract                        | 2       | Provide a structured summary of objectives, perspective, setting, methods (including study design and inputs), results (including base case and uncertainty analyses), and conclusions.    | P2-3                        |
| <b>Introduction</b>             |         |                                                                                                                                                                                            |                             |
| Background and objectives       | 3       | Provide an explicit statement of the broader context for the study. Present the study question and its relevance for health policy or practice decisions.                                  | 5/1 – 6/20                  |
| <b>Methods</b>                  |         |                                                                                                                                                                                            |                             |
| Target population and subgroups | 4       | Describe characteristics of the base case population and subgroups analysed, including why they were chosen.                                                                               | 7/12-16                     |
| Setting and location            | 5       | State relevant aspects of the system(s) in which the decision(s) need(s) to be made.                                                                                                       | 7/12-16                     |
| Study perspective               | 6       | Describe the perspective of the study and relate this to the costs being evaluated.                                                                                                        | 7/1-9                       |
| Comparators                     | 7       | Describe the interventions or strategies being compared and state why they were chosen.                                                                                                    | 7/20 - 8/2                  |
| Time horizon                    | 8       | State the time horizon(s) over which costs and consequences are being evaluated and say why appropriate.                                                                                   | 6/25 - 7/1                  |
| Discount rate                   | 9       | Report the choice of discount rate(s) used for costs and outcomes and say why appropriate.                                                                                                 | 13/4-5                      |
| Choice of health outcomes       | 10      | Describe what outcomes were used as the measure(s) of benefit in the evaluation and their relevance for the type of analysis performed.                                                    | 8/5-13                      |
| Measurement of effectiveness    | 11a     | <i>Single study-based estimates:</i> Describe fully the design features of the single effectiveness study and why the single study was a sufficient source of clinical effectiveness data. | 6/25-7/1<br>7/12-17         |
|                                 | 11b     | <i>Synthesis-based estimates:</i> Describe fully the methods used for identification of included studies and synthesis of clinical effectiveness data.                                     | n/a                         |

|                                                        |     |                                                                                                                                                                                                                                                                                                                                                       |                         |
|--------------------------------------------------------|-----|-------------------------------------------------------------------------------------------------------------------------------------------------------------------------------------------------------------------------------------------------------------------------------------------------------------------------------------------------------|-------------------------|
| Measurement and valuation of preference based outcomes | 12  | If applicable, describe the population and methods used to elicit preferences for outcomes.                                                                                                                                                                                                                                                           | 8/5-6<br>12/6-7         |
| Estimating resources and costs                         | 13a | <i>Single study-based economic evaluation:</i> Describe approaches used to estimate resource use associated with the alternative interventions. Describe primary or secondary research methods for valuing each resource item in terms of its unit cost. Describe any adjustments made to approximate to opportunity costs.                           | 8/16 – 11/23            |
|                                                        | 13b | <i>Model-based economic evaluation:</i> Describe approaches and data sources used to estimate resource use associated with model health states. Describe primary or secondary research methods for valuing each resource item in terms of its unit cost. Describe any adjustments made to approximate to opportunity costs.                           | n/a                     |
| Currency, price date, and conversion                   | 14  | Report the dates of the estimated resource quantities and unit costs. Describe methods for adjusting estimated unit costs to the year of reported costs if necessary. Describe methods for converting costs into a common currency base and the exchange rate.                                                                                        | 11/25                   |
| Choice of model                                        | 15  | Describe and give reasons for the specific type of decision-analytical model used. Providing a figure to show model structure is strongly recommended.                                                                                                                                                                                                | n/a                     |
| Assumptions                                            | 16  | Describe all structural or other assumptions underpinning the decision-analytical model.                                                                                                                                                                                                                                                              | n/a                     |
| Analytical methods                                     | 17  | Describe all analytical methods supporting the evaluation. This could include methods for dealing with skewed, missing, or censored data; extrapolation methods; methods for pooling data; approaches to validate or make adjustments (such as half cycle corrections) to a model; and methods for handling population heterogeneity and uncertainty. | 12/7-10<br>12/23-13/2   |
| <b>Results</b>                                         |     |                                                                                                                                                                                                                                                                                                                                                       |                         |
| Study parameters                                       | 18  | Report the values, ranges, references, and, if used, probability distributions for all parameters. Report reasons or sources for distributions used to represent uncertainty where appropriate. Providing a table to show the input values is strongly recommended.                                                                                   | n/a                     |
| Incremental costs and outcomes                         | 19  | For each intervention, report mean values for the main categories of estimated costs and outcomes of interest, as well as mean differences between the comparator groups. If applicable, report incremental cost-effectiveness ratios.                                                                                                                | 15/1-23<br>Tables 5,6,7 |



|                                                                      |     |                                                                                                                                                                                                                                                                             |                                                                       |
|----------------------------------------------------------------------|-----|-----------------------------------------------------------------------------------------------------------------------------------------------------------------------------------------------------------------------------------------------------------------------------|-----------------------------------------------------------------------|
| Characterising uncertainty                                           | 20a | <i>Single study-based economic evaluation:</i> Describe the effects of sampling uncertainty for the estimated incremental cost and incremental effectiveness parameters, together with the impact of methodological assumptions (such as discount rate, study perspective). | 16/1-7<br>Table 7<br>Figure 1<br>16/13 – 17/16<br>Table 8<br>Figure 2 |
|                                                                      | 20b | <i>Model-based economic evaluation:</i> Describe the effects on the results of uncertainty for all input parameters, and uncertainty related to the structure of the model and assumptions.                                                                                 | n/a                                                                   |
| Characterising heterogeneity                                         | 21  | If applicable, report differences in costs, outcomes, or cost-effectiveness that can be explained by variations between subgroups of patients with different baseline characteristics or other observed variability in effects that are not reducible by more information.  | n/a                                                                   |
| <b>Discussion</b>                                                    |     |                                                                                                                                                                                                                                                                             |                                                                       |
| Study findings, limitations, generalisability, and current knowledge | 22  | Summarise key study findings and describe how they support the conclusions reached. Discuss limitations and the generalisability of the findings and how the findings fit with current knowledge.                                                                           | 17/21 – 18/26                                                         |
| <b>Other</b>                                                         |     |                                                                                                                                                                                                                                                                             |                                                                       |
| Source of funding                                                    | 23  | Describe how the study was funded and the role of the funder in the identification, design, conduct, and reporting of the analysis. Describe other non-monetary sources of support.                                                                                         | 26/6-11                                                               |
| Conflicts of interest                                                | 24  | Describe any potential for conflict of interest of study contributors in accordance with journal policy. In the absence of a journal policy, we recommend authors comply with International Committee of Medical Journal Editors recommendations.                           | 26/1-3                                                                |

**For consistency, the CHEERS statement checklist format is based on the format of the CONSORT statement checklist**



**A pragmatic randomised controlled trial of 'PhysioDirect' telephone assessment and advice services for patients with musculoskeletal problems: economic evaluation**

|                                 |                                                                                                                                                                                                                                                                                                                                                                                                                                                                                                                                                                                                                                               |
|---------------------------------|-----------------------------------------------------------------------------------------------------------------------------------------------------------------------------------------------------------------------------------------------------------------------------------------------------------------------------------------------------------------------------------------------------------------------------------------------------------------------------------------------------------------------------------------------------------------------------------------------------------------------------------------------|
| Journal:                        | <i>BMJ Open</i>                                                                                                                                                                                                                                                                                                                                                                                                                                                                                                                                                                                                                               |
| Manuscript ID:                  | bmjopen-2013-003406.R1                                                                                                                                                                                                                                                                                                                                                                                                                                                                                                                                                                                                                        |
| Article Type:                   | Research                                                                                                                                                                                                                                                                                                                                                                                                                                                                                                                                                                                                                                      |
| Date Submitted by the Author:   | 23-Aug-2013                                                                                                                                                                                                                                                                                                                                                                                                                                                                                                                                                                                                                                   |
| Complete List of Authors:       | Hollinghurst, Sandra; University of Bristol, Community Based Medicine Coast, Joanna; University of Birmingham, Department of Health Economics Busby, John; University of Bristol, Bishop, Annette; Keele University, Foster, Nadine; Keele University, Primary Care Musculoskeletal Research Centre<br>Franchini, Angelo; Imperial College, London, Grove, Sean; Bristol Community Health, Hall, Jeanette; Bristol Community Health, Hopper, Cherida; University of Bristol, Kaur, Surinder; University of Bristol, Montgomery, Alan; University of Nottingham, Salisbury, Chris; University of Bristol, Academic Unit of Primary Health Care |
| <b>Primary Subject Heading</b>: | Health economics                                                                                                                                                                                                                                                                                                                                                                                                                                                                                                                                                                                                                              |
| Secondary Subject Heading:      | General practice / Family practice                                                                                                                                                                                                                                                                                                                                                                                                                                                                                                                                                                                                            |
| Keywords:                       | economic evaluation, physiotherapy, telehealth, PRIMARY CARE, costs & cost analysis                                                                                                                                                                                                                                                                                                                                                                                                                                                                                                                                                           |
|                                 |                                                                                                                                                                                                                                                                                                                                                                                                                                                                                                                                                                                                                                               |

SCHOLARONE™  
Manuscripts

1  
2  
3 **A pragmatic randomised controlled trial of 'PhysioDirect' telephone**  
4 **assessment and advice services for patients with musculoskeletal problems:**  
5 **economic evaluation**  
6  
7

8  
9 Sandra Hollinghurst, Joanna Coast, John Busby, Annette Bishop, Nadine E Foster, Angelo Franchini,  
10 Sean Grove, Jeanette Hall, Cherida Hopper, Surinder Kaur, Alan A Montgomery, Chris Salisbury  
11

12 Sandra Hollinghurst, PhD. Senior Lecturer in Health Economics<sup>1</sup>

13 Joanna Coast, PhD. Professor of Health Economics<sup>2</sup>

14 John Busby, MSc. Research Assistant in Health Economics<sup>1</sup>

15 Annette Bishop, PhD. Research Physiotherapist<sup>3</sup>

16 Nadine E Foster, D.Phil. NIHR Professor of Musculoskeletal Health in Primary Care<sup>3</sup>

17 Angelo Franchini, MSc. Research Associate<sup>4</sup>

18 Sean Grove, MSc. Clinical Lead Physiotherapy<sup>5</sup>

19 Jeanette Hall, Grad Dip Phys. Operational lead for Outpatient Physiotherapy<sup>5</sup>

20 Cherida Hopper, PhD. Trial Manager<sup>1</sup>

21 Surinder Kaur, BSc. Research Associate<sup>1</sup>

22 Alan A Montgomery, PhD. Professor of Medical Statistics and Clinical Trials<sup>6</sup>

23 Chris Salisbury, MD. Professor of Primary Health Care<sup>1</sup>  
24  
25  
26  
27  
28

29 <sup>1</sup>Centre for Academic Primary Care, School of Social and Community Medicine, University of Bristol,  
30 UK

31 <sup>2</sup>Health Economics Unit, School of Health & Population Sciences, University of Birmingham, UK

32 <sup>3</sup>Arthritis Research UK Primary Care Centre, Primary Care Sciences, Keele University, UK

33 <sup>4</sup>Imperial Clinical Trials Unit, School of Public Health Medicine, Imperial College, London, UK

34 <sup>5</sup>Musculoskeletal Outpatient Department, Bristol Community Health, UK

35 <sup>6</sup>Nottingham Clinical Trials Unit, Queen's Medical Centre, Nottingham, UK  
36  
37  
38  
39

40 **Correspondence:**

41 Sandra Hollinghurst, School of Social and Community Medicine, University of Bristol, Canynge Hall,  
42 39 Whatley Road, Bristol BS8 2PS

43 s.p.hollinghurst@bristol.ac.uk

44 0117 331 3901  
45  
46  
47  
48  
49

50 Key Words: economic evaluation; physiotherapy; telehealth; primary care; cost & cost analysis  
51  
52  
53  
54  
55  
56  
57  
58  
59  
60

1  
2  
3 **A pragmatic randomised controlled trial of 'PhysioDirect' telephone assessment and**  
4 **advice services for patients with musculoskeletal problems: economic evaluation**  
5  
6

7 **ABSTRACT**  
8

9  
10 **Objectives**

11 To compare the cost-effectiveness of PhysioDirect with usual physiotherapy care for patients  
12 with musculoskeletal problems.  
13

14  
15  
16  
17 **Design**

18 (i) Cost-consequences comparing cost to the NHS, to patients, and the value of lost productivity  
19 with a range of outcomes. (ii) Cost-utility analysis comparing cost to the NHS with Quality  
20 Adjusted Life Years (QALYs)  
21  
22  
23

24  
25 **Setting**

26 Four physiotherapy services in England  
27  
28  
29

30 **Participants**

31 Adults (18+) referred by their general practitioner or self-referred for physiotherapy.  
32  
33  
34

35 **Interventions**

36 PhysioDirect involved telephone assessment and advice followed by face-to-face care if needed.  
37 Usual care patients were placed on a waiting list for face-to-face care.  
38  
39  
40  
41

42 **Primary and secondary outcomes**

43 Primary clinical outcome: physical component summary from the SF-36v2 at six months. Also  
44 included in the cost-consequences: Measure Yourself Medical Outcomes Profile; a Global  
45 Improvement Score; response to treatment; patient satisfaction; waiting time.  
46  
47 Outcome for the cost-utility analysis: QALYs  
48  
49  
50

51  
52 **Results**

53 2249 patients took part (1506 PhysioDirect; 743 usual care).  
54  
55  
56  
57  
58  
59  
60

1  
2  
3 (i) Cost-consequences: there was no evidence of a difference between the two groups in the cost of  
4 physiotherapy, other NHS services, personal costs or value of time off work. Outcomes were also  
5 similar.  
6

7  
8 (ii) Cost-utility analysis based on complete cases (n=1,272). Total NHS costs, including the cost of  
9 physiotherapy were higher in the PhysioDirect group by £19.30 (95% CI: -£37.60 to £76.19) and  
10 there was a QALY gain of 0.007 (95% CI: -0.003 to 0.016). The incremental cost-effectiveness ratio  
11 was £2,889 and the net monetary benefit at  $\lambda$ =£20,000 was £117 (95% CI: -£86 to £310)  
12  
13

## 14 15 16 **Conclusions**

17 PhysioDirect may be a cost-effective alternative to usual physiotherapy care, though only with  
18 careful management of staff time. Physiotherapists providing the service must be more fully  
19 occupied than was possible under trial conditions: consideration should be given to the scale of  
20 operation, opening times of the service, and flexibility in the methods used to contact patients.  
21  
22  
23  
24  
25  
26  
27  
28  
29  
30  
31  
32  
33  
34  
35  
36  
37  
38  
39  
40  
41  
42  
43  
44  
45  
46  
47  
48  
49  
50  
51  
52  
53  
54  
55  
56  
57  
58  
59  
60

## Article Summary

### Article focus

- What is the cost of providing PhysioDirect telephone assessment and advice, followed by face-to-face care if needed, to adults with musculoskeletal pain problems, compared with usual physiotherapy care?
- What are the patient benefits of PhysioDirect compared with usual care?
- Is PhysioDirect a cost-effective alternative to usual care for primary care patients with musculoskeletal conditions?

### Key messages

- There was very little difference between the two groups in terms of cost or outcomes
- PhysioDirect has potential to be a cost-effective alternative to usual care but requires careful management of staff resources

### Strengths and limitations of this study

- Findings are based on a large sample of patients with a wide range of musculoskeletal problems based in diverse locations
- The study takes a broad perspective, including the health care provider, patients, and a valuation of lost productivity
- Physiotherapists were constrained by trial conditions and were underutilised

## 1 INTRODUCTION

2 There is a trend to explore the use of new technology in the delivery of health care, particularly the  
3 use of telephone assessment and triage, as for example in NHS Direct.<sup>1</sup> These services aim to better  
4 manage patient demand, and research has shown that telephone based services can be safe,  
5 clinically accurate, cost-effective, acceptable to patients, and reduce the workload of clinicians,<sup>2-5</sup>  
6 although there have been some concerns about using telephone triage in patients presenting with  
7 acute health problems.<sup>6</sup>

8  
9 Musculoskeletal pain problems are one of the most common causes of disability. Over a quarter of  
10 all patients registered in general practice will consult at least once for a musculoskeletal problem  
11 each year,<sup>7,8</sup> with musculoskeletal pain accounting for around 15% of all GP consultations.<sup>9</sup> This high  
12 prevalence of musculoskeletal problems<sup>10</sup> results in large direct and indirect healthcare costs: for  
13 example, low back pain alone has recently been estimated to cost the UK economy £15.84 billion a  
14 year.<sup>11, 12</sup> Most patients are managed with advice and analgesia but many are referred to  
15 physiotherapists, with 1.23 million new referrals each year from GPs and 4.4 million in total.<sup>13</sup>  
16 Ensuring timely access to physiotherapy has long been an issue within the UK NHS, with waiting  
17 times of more than four months in some areas. Patients may suffer unnecessary pain and disability,  
18 and there are high productivity losses: for example, back pain accounts for some 120 million days of  
19 certified absence from work each year.<sup>14</sup> Delay may also cause NHS inefficiencies on the one hand as  
20 some patients recover and do not attend their physiotherapy appointment when it finally arrives,  
21 whilst on the other, some patients continue to access more expensive forms of treatment whilst  
22 awaiting their appointment.

23  
24 In response to these problems, physiotherapy services have drawn on the new service models and a  
25 range of 'PhysioDirect' services have been developed. These vary in format though they commonly  
26 involve a physiotherapist assessing a patient's musculoskeletal pain problem over the telephone,

1  
2  
3 1 sometimes supported by computerised assessment templates, offering tailored, self-management  
4  
5 2 advice supplemented by written advice sent by post. Alternatively if the assessment findings  
6  
7 3 suggest that face-to-face care is needed this is arranged, and patients who are initially managed by  
8  
9 4 telephone advice can phone back for further advice and/or face-to-face treatment.<sup>15</sup> There is,  
10  
11 5 however, limited evidence about the costs and benefits of this approach within physiotherapy. Local  
12  
13 6 evaluations and non-randomised studies suggest that these services may be popular with patients<sup>16-</sup>  
14  
15 7 <sup>18</sup> and diagnoses made by physiotherapists over the telephone are comparable to diagnoses reached  
16  
17 8 in face-to-face assessments<sup>19-21</sup> although there is some concern that the experience of the  
18  
19 9 physiotherapist providing the telephone assessment might be important.<sup>19,22</sup>  
20  
21  
22  
23

24  
25 11 In particular there is no information about the costs or cost-effectiveness of PhysioDirect services,  
26  
27 12 despite: (i) a major underlying rationale for their development being to generate greater efficiency  
28  
29 13 in the use of resources; and (ii) a ready presumption that telephone-based services result in lower  
30  
31 14 costs (by assuming that services better use physiotherapy time, use less costly telephone  
32  
33 15 consultations and reduce rates of appointment non-attendance). Without such evidence, preferably  
34  
35 16 generated alongside high quality primary evidence obtained using rigorous study designs, it remains  
36  
37 17 unclear whether such services should be more widely implemented. This paper reports the results of  
38  
39 18 an economic evaluation conducted alongside a randomised controlled trial powered to generate  
40  
41 19 evidence on whether PhysioDirect services for primary care patients with musculoskeletal problems  
42  
43 20 produce equivalent outcomes to usual face-to-face services.  
44  
45  
46  
47  
48  
49  
50

## 51 **METHOD**

### 52 53 24 **Study design**

54  
55 25 We conducted an economic evaluation alongside a randomised controlled trial to establish the cost-  
56  
57 26 effectiveness of PhysioDirect compared with usual care based only on face-to-face treatment over a  
58  
59  
60



1 period of 6 months. The trial and its clinical findings have been reported in full elsewhere.<sup>15,23</sup> The  
2 aim of the evaluation was to provide information about the long-run costs and benefits of the  
3 alternative methods of running a physiotherapy service for this patient group so with that in mind  
4 we excluded the initial set up costs associated with establishing the new telephone service, including  
5 the training undertaken by the practitioners.<sup>24</sup> As the nature of the intervention suggests there could  
6 be an impact on patients' costs, and as it is known that musculoskeletal conditions account for a  
7 considerable amount of time off work<sup>14</sup> we chose to use a cost-consequences approach, comparing  
8 cost from all three perspectives (health care provider, patients and carers, lost productivity) with a  
9 range of clinical outcomes.<sup>25,26</sup> However, the perspective of greatest interest to UK policy makers is  
10 the health and social care provider<sup>23</sup> so we also conducted a cost-utility analysis to compare cost to  
11 the National Health Service (NHS) with Quality-Adjusted Life-Years (QALYs).

12

### 13 **Setting and participants**

14 We recruited adults aged 18 and over from four community physiotherapy services in England –  
15 Bristol, Somerset, Stoke-on-Trent, and Cheshire – which provided diversity in terms of socio-  
16 economic status and a mix of urban and rural communities. All patients referred by their general  
17 practitioner (GP), or who referred themselves, for physiotherapy for a non-urgent musculoskeletal  
18 problem were invited to take part. Patients were randomised to PhysioDirect or usual care on a two  
19 to one basis to increase the chances of the PhysioDirect service being fully utilised.

20

### 21 **Interventions**

22 The intervention has been reported in detail elsewhere<sup>15,25</sup>. Patients randomised to the PhysioDirect  
23 service received an invitation to telephone a senior (band 6 or above) specially trained  
24 physiotherapist, who assessed their musculoskeletal problem with the aid of previously developed  
25 computerised templates.<sup>23</sup> These templates were provided by Huntingdonshire Primary Care Trust,  
26 which has been operating a similar service since 2001. Patients were then sent appropriate advice

1  
2  
3 1 leaflets about self-management and exercises to try at home, and invited to phone again and/or  
4  
5 2 make a face-to-face appointment if necessary. If the service was engaged when the patient called  
6  
7 3 the call was answered by a receptionist who added the patient to a 'call-back' list and the  
8  
9 4 physiotherapist would return the call when they were free. Patients randomised to usual care were  
10  
11 5 put on the usual service waiting list for face-to-face assessment and treatment.  
12  
13  
14 6

### 7 **Outcome measures**

8 We used the EQ-5D-3L<sup>28</sup>, valued using the UK tariff,<sup>29</sup> to estimate QALYs gained for the cost-utility  
9  
10 9 analysis. The primary outcome for the trial was the physical component summary (PCS) measure  
11  
12 10 from the SF-36v2 questionnaire<sup>30</sup> and secondary clinical outcomes included: the Measure Yourself  
13  
14 11 Medical Outcomes Profile (MYMOP);<sup>31</sup> a Global Improvement Score – a single question about overall  
15  
16 12 improvement; a composite measure of response to treatment including pain, function and overall  
17  
18 13 improvement (OMERACT OARSI);<sup>32</sup> patient satisfaction; and waiting time to first treatment advice  
19  
20 14 from a physiotherapist. All outcomes (except the global improvement score and waiting time to first  
21  
22 15 treatment advice) were measured at baseline, 6 weeks and 6 months and were obtained from a self  
23  
24 16 completed questionnaire administered at these three time points.  
25  
26  
27  
28  
29  
30  
31  
32  
33  
34  
35  
36  
37  
38  
39  
40  
41  
42  
43  
44  
45  
46  
47  
48  
49  
50  
51  
52  
53  
54  
55  
56  
57  
58  
59  
60

### 18 **Resource use**

19 The analysis was based on costs related to the reason for which the patient was referred to the  
20  
21 20 physiotherapy service. We identified relevant resources in discussion with participating  
22  
23 21 physiotherapists and service managers. Direct costs to the health care provider included: cost of  
24  
25 22 initial and follow-up physiotherapy consultations; primary and community consultations; hospital  
26  
27 23 care; and prescribed medication. Patient and carer costs included: telephone calls to the  
28  
29 24 PhysioDirect service; travel; over the counter medication; prescription costs; private therapy and  
30  
31 25 purchase of equipment; extra domestic help; and loss of earnings. Lost productivity was estimated

1  
2  
3 1 separately in relation to time off work to attend physiotherapy appointments and time off because  
4  
5 2 of the musculoskeletal condition itself.  
6  
7 3

8  
9 4 Patient level data about all physiotherapy appointments and consultations were recorded either  
10  
11 5 automatically by computer or by the physiotherapist treating the patient. For those in the  
12  
13 6 intervention group, the PhysioDirect assessment software recorded which physiotherapist  
14  
15 7 conducted each telephone call, and the duration of each call. In addition to the time logged on to  
16  
17 8 the system physiotherapists had to carry out administrative activities following each telephone call,  
18  
19 9 such as collating information to send to the patient by post. The time spent on these activities was  
20  
21 10 estimated from information available at one site (Bristol) where manual recording of the entire  
22  
23 11 encounter supplemented the electronic recording.  
24  
25  
26  
27  
28

29 13 Physiotherapists assigned to the PhysioDirect service were required to be available throughout the  
30  
31 14 time the service was 'open' but they were not usually fully engaged in dealing with PhysioDirect  
32  
33 15 patients during these hours. We conducted an observational time and motion study at each of the  
34  
35 16 four sites to determine how they occupied their non-PhysioDirect contact time in order to apportion  
36  
37 17 costs appropriately. Time and motion data were collected at points in the study when the sites were  
38  
39 18 expected to be fully operational, and across a mix of day, time of day, and location. The capital costs  
40  
41 19 required to run a telephone service are potentially less than for a face-to-face service. Each site  
42  
43 20 provided information about space and equipment required to run their telephone service and we  
44  
45 21 used this to estimate an overall percentage reduction of capital costs for these compared with a  
46  
47 22 standard face-to-face service.  
48  
49  
50  
51  
52

53 24 Data about all face-to-face appointments were recorded routinely. These data included the length of  
54  
55 25 appointment, the grade of the physiotherapist seen, and information about missed appointments.  
56  
57  
58  
59  
60

1  
2  
3 1 Information about other NHS resource use was collected, where possible, from general practice  
4  
5 2 records and supplemented by information gained directly from patients. General practice notes  
6  
7 3 were scrutinised for patient level data on primary care consultations and prescribed medication. We  
8  
9 4 included all consultations at which the musculoskeletal condition for which the patient was referred  
10  
11 5 to physiotherapy was mentioned and these were recorded by type of consultation (for example,  
12  
13 6 face-to-face, telephone, out of hours, home visit) and by type of professional seen (for example, GP,  
14  
15 7 nurse). It was not feasible to distinguish between medication prescribed for the condition for which  
16  
17 8 the patient was referred for physiotherapy and any other musculoskeletal problem so we included  
18  
19 9 all medication of a potentially relevant type, defined using British National Formulary (BNF)<sup>33</sup> coding.  
20  
21 10 These were: Analgesics (chapters 4.7.1 – 4.7.2); Non-steroidal anti-inflammatory drugs (10.1.1);  
22  
23 11 Local corticosteroid injections (10.1.2.2); and Drugs for the relief of soft-tissue inflammation (10.3).  
24  
25  
26  
27  
28

29 13 A questionnaire was administered to participants at 6 weeks and 6 months after randomisation to  
30  
31 14 obtain resource use data not available elsewhere. The questionnaire was designed specifically for  
32  
33 15 this study but was similar in content and structure to others used for the same purpose<sup>34</sup> Questions  
34  
35 16 included information about hospital care related to the condition for which the patient was referred  
36  
37 17 to physiotherapy: visits to Accident & Emergency, outpatient appointments, and inpatient stays.  
38  
39 18 Information about personal expenditure relevant to the patient's musculoskeletal condition was also  
40  
41 19 gained from the questionnaire at 6 weeks and 6 months. We asked about the cost of travel to  
42  
43 20 physiotherapy and other health care appointments, expenditure on over the counter medication,  
44  
45 21 prescription costs, use of private therapies and their cost, expenditure on equipment or devices, and  
46  
47 22 extra help at home. In addition, participants were asked about any time off work, and the associated  
48  
49 23 loss of earnings, because of their condition or to attend health care appointments relating to the  
50  
51 24 condition including usual care physiotherapy and PhysioDirect.  
52  
53  
54  
55

## 56 57 26 **Valuation of resource use**

58  
59  
60

1  
2  
3 1 Table 1 gives the unit costs and sources used to value the health care resources. We used Curtis<sup>35</sup> to  
4  
5 2 value primary and community health care and Department of Health reference costs<sup>36</sup> for all  
6  
7 3 hospital-based care. The cost of prescribed medication was estimated from that published in the  
8  
9 4 BNF,<sup>33</sup> adjusted to allow for the discount available to the NHS, and the professional fee and  
10  
11 5 container allowance in accordance with the Drug Tariff for England.<sup>37</sup> Personal expenditure was  
12  
13 6 reported directly by the participants, the exception being travel by car, which was reported as  
14  
15 7 mileage and costed using the AA schedule of motoring costs.<sup>38</sup> Time off work was valued using the  
16  
17 8 median gross weekly earnings by age and sex.<sup>39</sup>  
18  
19  
20  
21  
22  
23  
24  
25  
26  
27  
28  
29  
30  
31  
32  
33  
34  
35  
36  
37  
38  
39  
40  
41  
42  
43  
44  
45  
46  
47  
48  
49  
50  
51  
52  
53  
54  
55  
56  
57  
58  
59  
60

*Table 1 here*

12 The cost of face-to-face physiotherapy consultations was estimated by adapting the methods of  
13  
14 Curtis<sup>35</sup> to obtain a different unit cost for each band of staff at each site. National median pay rates,  
15  
16 by band,<sup>40</sup> were adjusted to allow for National Insurance, superannuation, and overheads, as per  
17  
18 Curtis, then further adjusted to allow for band and site specific non-contact time. Information about  
19  
20 the proportion of time physiotherapists on each grade typically spend in direct contact with patients  
21  
22 was provided by the four physiotherapy service managers. This provided us with a cost per hour for  
23  
24 each band of staff at each site.  
25

20 The unit cost of physiotherapists working in the PhysioDirect service was estimated in a similar way,  
21  
22 but allowing for the reduced cost of capital and overheads; information from the site managers  
23  
24 indicated this to be about 50%. To obtain a cost per hour of telephone contact we used information  
25  
26 from the computerised records of the PhysioDirect service, which identified the proportion of time  
27  
28 spent by physiotherapists actually dealing with PhysioDirect patients. We then combined this with  
29  
30 data from the time and motion study, which identified activities undertaken during non-contact  
31  
32  
33  
34  
35  
36  
37  
38  
39  
40  
41  
42  
43  
44  
45  
46  
47  
48  
49  
50  
51  
52  
53  
54  
55  
56  
57  
58  
59  
60

1 time, for example, administration relating to face-to-face appointments or general administration, to  
2 give a cost per hour for each band of staff at each site.

3  
4 All costs were valued in £ sterling at 2009 prices, adjusted for inflation where necessary.<sup>35</sup>

## 6 **Data analysis**

7 We investigated the amount of each resource used by patients in each group using frequencies,  
8 means and medians. Mean total cost per participant was derived by combining resource use with  
9 unit costs.

10  
11 QALYs were derived from responses to the EQ-5D-3L at baseline, 6 weeks and 6 months using  
12 valuations from the UK general population.<sup>29</sup> These values, representing health-related quality of life  
13 on a scale between zero (death) and 1 (best imaginable health), were used to compute QALYs  
14 experienced over the 6 month period using the area under the curve approach and adjusting for any  
15 difference between the groups at baseline.<sup>43</sup>

16  
17 A cost-consequences matrix was constructed using all available data. We compared costs from all  
18 three perspectives (health care provider, patients and carers, lost productivity) with the SF-36v2 PCS,  
19 MYMOP, Global Improvement Score, OMERACT OARSI, patient satisfaction, waiting time, and QALYs.

20  
21 The cost-utility analysis was carried out using data on all patients for whom we had complete NHS  
22 cost and QALY data. An incremental cost-effectiveness ratio (ICER) was constructed, comparing the  
23 difference in mean total cost per patient with mean difference in QALYs, thus the lower the ICER, the  
24 greater the cost-effectiveness and the better the value for money. Uncertainty around the ICER was  
25 captured using the bootstrapping technique: 5000 replicates of the cost and QALY data were created  
26 by sampling from the original data, with replacement. The range and spread of the 5000 ICERs was

1  
2  
3 1 used to construct a cost-effectiveness acceptability curve to indicate the likelihood of the  
4  
5 2 intervention being cost-effective. The net monetary benefit (NMB) of the intervention was  
6  
7 3 estimated from the point estimate of the ICER for values of societal willingness-to-pay of £20,000  
8  
9 4 and £30,000 per QALY. If the NMB is positive at a given level of willingness to pay, the intervention is  
10  
11 5 regarded as cost-effective. Confidence intervals around the NMB were formed from the  
12  
13 6 bootstrapped estimates.  
14  
15  
16  
17  
18

19 8 We used the multiple imputation by chained equation procedure to address the issue of missing cost  
20  
21 9 and EQ-5D data.<sup>44</sup> This technique uses a regression model to estimate missing values from known  
22  
23 10 values. In addition to cost and EQ-5D-3L variables the imputation model also included randomisation  
24  
25 11 group, age, sex, and SF36v2 PCS. Stata v12<sup>45</sup> was used to generate five datasets using 10 switching  
26  
27 12 procedures.  
28  
29  
30

31 14 Discounting was not carried out because the analysis was restricted to costs and outcomes over a  
32  
33 15 period of less than a year. All analyses were conducted using Microsoft Excel and Stata v12.<sup>44</sup>  
34  
35  
36  
37

### 38 17 **Sensitivity Analyses**

39  
40 18 We addressed three areas of uncertainty using four one/two-way sensitivity analyses. First, we  
41  
42 19 estimated the cost of running the PhysioDirect service if it was operating at full capacity. It is likely  
43  
44 20 that this was not achieved during the trial because of: low demand due to exclusions and non-  
45  
46 21 participation in the trial; inflexible staffing levels to ensure consistency throughout the trial period;  
47  
48 22 and the 'one-way' system generally used, where physiotherapists waited for patients to call them  
49  
50 23 but did not routinely contact patients themselves (notwithstanding some limited use of answer-  
51  
52 24 machines). Data from the Bristol service, which continued to operate beyond the trial period and  
53  
54 25 was then able to tailor staffing levels to demand, were used to estimate the cost of running a more  
55  
56 26 'efficient but feasible' PhysioDirect service once the trial had ended.  
57  
58  
59  
60

1  
2  
3 1  
4  
5 2 The second area of uncertainty addressed hospital costs. Patients in the trial were recruited from  
6  
7 3 primary care and for these use of secondary care is infrequent but relatively expensive and this can  
8  
9 4 have a disproportionate effect on mean total cost. We tested this by excluding hospital costs from  
10  
11 5 the total.  
12  
13 6

14  
15  
16 7 The third area of uncertainty tested the effect of using imputed data rather than complete cases; the  
17  
18 8 third sensitivity analysis used trial data with missing values imputed.  
19  
20 9

21  
22 10 Finally, in a two-way sensitivity analysis, we re-estimated the results of the first, (mimicking an  
23  
24 11 'efficient but feasible' service) in this instance using the imputed dataset.  
25  
26  
27 12  
28  
29 13

## 30 31 14 **RESULTS**

32  
33 15 A total of 2,249 patients were recruited between July 2009 and December 2009, and followed up  
34  
35 16 until June 2010, 1506 allocated to PhysioDirect and 743 to usual care. The mean age was 60, with  
36  
37 17 slightly more females than males (60% vs 40%); they were overwhelmingly white (97%), just over  
38  
39 18 half (60%) were employed and all but a few were referred for physiotherapy by their GP. Lower limb  
40  
41 19 problems were the most prevalent (30%) reason for referral, 27% patients had a lumbar problem  
42  
43 20 and 23% upper limb problems. Nearly all participants (2,223=99%) gave permission to access their  
44  
45 21 GP notes to obtain data about primary care encounters and prescribed medication. 81% returned  
46  
47 22 questionnaires at both 6 weeks and 6 months though not all participants completed all sections at  
48  
49 23 both time points. We had complete NHS cost and QALY data for 840 (56%) PhysioDirect and 432  
50  
51 24 (58%) usual care participants.  
52  
53  
54  
55  
56  
57 25

## 58 59 26 **Resource use**

60



1  
2  
3  
4  
5  
6  
7  
8  
9  
10  
11  
12  
13  
14  
15  
16  
17  
18  
19  
20  
21  
22  
23  
24  
25  
26  
27  
28  
29  
30  
31  
32  
33  
34  
35  
36  
37  
38  
39  
40  
41  
42  
43  
44  
45  
46  
47  
48  
49  
50  
51  
52  
53  
54  
55  
56  
57  
58  
59  
60

1 Table 2 gives information about the different types of physiotherapy consultations by patients in  
2 each group. Of the 1506 patients in the PhysioDirect group, 39% (586) were managed solely over the  
3 telephone and only 46% (695) had any face-to-face consultations. In total, patients in the usual care  
4 group had, on average, 0.38 (95% CI: 0.12 to 0.63) more consultations than those in the PhysioDirect  
5 group and the mean total duration of all consultations was 20 minutes longer (95% CI: 12 to 28).

6  
7 *Table 2 here*  
8

9 Tables 3 and 4 give information about NHS and personal resource use. Just over a third of patients  
10 (35%) had a GP consultation during the 6 months and 40% received a prescription for  
11 musculoskeletal pain-related medication. There was very little difference between the two groups in  
12 terms of health care use and the only notable difference in personal expenditure was travel to  
13 physiotherapy appointments.

14  
15 *Tables 3 and 4 here*  
16

### 17 **Costs and consequences**

18 Table 5 summarises the mean cost per patient, by group, for each category of cost. All available data  
19 are included giving variable denominators for each category. Comparing the two groups, there are  
20 small differences in cost in some categories but for most of these the confidence intervals indicate  
21 there is no evidence of a difference between the groups.

22  
23 *Table 5 here*  
24

25 Table 6 combines the results of the cost analysis with the full range of primary and secondary  
26 outcomes, including QALYs.

1

2

*Table 6 here*

3

4 Results are presented for all available data, with cost categories combined. Denominators vary  
5 within the table and they also differ from those in table 5 because sub-categories have been  
6 collapsed. There was no evidence of a difference in the primary clinical outcome (the SF36v2 PCS)  
7 between the groups, suggesting that PhysioDirect led to similar outcomes as usual physiotherapy  
8 care. Patients in the PhysioDirect group had their first assessment and telephone advice 27 days  
9 earlier than those in the usual care group, however patient satisfaction was slightly lower in those  
10 receiving PhysioDirect. QALYs were higher in the PhysioDirect group by 0.009, which equates to  
11 about 3.3 extra days of full health over a year.

12

### 13 **Cost-utility analysis**

14 The cost-utility analysis presented in Table 7 uses complete cases, that is, we include only those  
15 patients for whom we had complete NHS cost and QALY data: 432 (58%) from the usual care group  
16 and 840 (56%) from PhysioDirect. The small extra cost of caring for patients in the PhysioDirect  
17 group was compensated for by the extra QALY gain, giving an incremental cost-effectiveness ratio of  
18 £2,889. Values below £20,000 are regarded by NICE to indicate a cost-effective intervention<sup>27</sup> At this  
19 threshold level of willingness to pay for a QALY there is a positive net monetary benefit of £117 (95%  
20 CI -£96 to £310) and there is 0.88 probability that the intervention is cost-effective. This is illustrated  
21 in the cost-effectiveness acceptability curve in figure 1.

22

23

*Table 7 here*

24

*Figure 1 here*

25

### 26 **Sensitivity Analysis**

27

28

29

30

1  
2  
3 1 The results of the four sensitivity analyses are shown in table 8 and figure 2. Scenario (1) indicates  
4  
5 2 the potential cost-effectiveness of a more efficient PhysioDirect service. During the trial PhysioDirect  
6  
7 3 clinic opening hours, physiotherapists spent about 35% of their time on the phone or dealing with  
8  
9 4 directly related administration; in Bristol after the trial, this was increased to 57%. Under this  
10  
11 5 scenario, the cost per patient in the PhysioDirect group was £14.53 less than under trial conditions  
12  
13 6 and £2.11 less per patient in the usual care group. The ICER is therefore lower, at £1,045, the NMB  
14  
15 7 correspondingly higher at £127 ( $\lambda$ =£20,000). At low levels of  $\lambda$ , the probability of PhysioDirect being  
16  
17 8 cost-effective under this scenario is higher than with the base case, though at  $\lambda$ =£20,000 it reaches a  
18  
19 9 similar value (see figures 1 and 2).  
20  
21  
22  
23

24  
25 11 *Table 8 here*

26  
27 12 *Figure 2 here*  
28  
29  
30

31 14 The effect of removing hospital costs from the analysis is shown in sensitivity analysis (2). Hospital  
32  
33 15 costs accounted for 75% of all NHS costs yet only 19% (n=252) participants reported using any  
34  
35 16 secondary care. Hospital use was evenly divided between the two groups so removing these from  
36  
37 17 the analysis made very little difference to incremental analysis.  
38  
39  
40

41  
42 19 The effect of imputing missing NHS cost and QALY data is explored in sensitivity analysis (3). Using  
43  
44 20 these data the cost of the interventions is lower but this is offset by higher NHS costs, giving a higher  
45  
46 21 mean total cost in both groups, by £21.41 in the usual care group and £6.58 in the PhysioDirect  
47  
48 22 group. QALYs using imputed data are lower, by 0.005 in the usual care group and by 0.010 in the  
49  
50 23 PhysioDirect group. The net effect is a reduction of both incremental cost and incremental QALYs,  
51  
52 24 giving an ICER of £2,260. Uncertainty around the ICER is reduced, as seen by the flatter CEAC in  
53  
54 25 figure 2.  
55  
56  
57  
58  
59  
60

1  
2  
3 1 Sensitivity analysis (4) combines analyses (1) and (3) by using imputed cost data in the 'efficient  
4  
5 2 service' scenario. In this case the results indicate that PhysioDirect is, on average, cheaper than usual  
6  
7 3 care with a possible saving of £6.02 per patient, which gives a negative value for the ICER, indicating  
8  
9 4 the intervention is superior in terms of both cost and outcome. The probability that the service is  
10  
11 5 cost-effective at  $\lambda = \text{£}20,000$  is 0.72.  
12  
13  
14  
15  
16  
17

## 18 **DISCUSSION**

### 19 **Statement of principal findings**

20  
21  
22 10 The results of this economic evaluation suggest that PhysioDirect services for patients with  
23  
24 11 musculoskeletal problems require careful management if they are to be a cost-effective alternative  
25  
26 12 to usual physiotherapy care. There was very little difference between the two groups in terms of  
27  
28 13 either outcomes or costs, and the finding that PhysioDirect is cost-effective is based on evidence  
29  
30 14 that it provides very slightly greater QALY benefits at very slightly greater cost.  
31  
32  
33  
34

35 16 Clearer cost savings were observed in the sensitivity analysis that replicated the post-trial service,  
36  
37 17 once greater flexibility in working arrangements was implemented. Without the restrictions of a trial  
38  
39 18 environment staffing was adjusted to meet the anticipated demand, a call-back service was  
40  
41 19 employed which accommodated fluctuations in activity during each session, referrals added to the  
42  
43 20 system were adjusted regularly to reflect actual staffing and the number of patients waiting for  
44  
45 21 a call-back and a higher throughput of patients led to greater economies of scale. These changes  
46  
47 22 ensured physiotherapists within the PhysioDirect service spent a higher proportion of their  
48  
49 23 PhysioDirect clinic time on the telephone with patients. There was no evidence of a difference  
50  
51 24 between PhysioDirect and usual care in cost to patients and their families, or to society through the  
52  
53 25 costs of lost production.  
54  
55  
56  
57  
58  
59  
60

## 1 Strengths and weaknesses of the study

2 The study has a number of strengths. It is the first study assessing the cost-effectiveness of a  
3 PhysioDirect service including a large sample of patients with a wide range of musculoskeletal  
4 problems based across a number of locations.<sup>15</sup> It uses a rigorous study design and conforms to  
5 CONSORT guidelines.<sup>46</sup> The follow up rate from participating patients was in line with other primary  
6 care trials,<sup>47,48</sup> a high proportion of the resource use data were collected from GP records, and there  
7 was collection of resource use information outside of the main health service perspective. The cost  
8 consequences analysis provides complete information on costs from different perspectives  
9 compared with a range of outcomes so although this approach is sometimes criticised for leaving the  
10 reader to evaluate the findings it does have the advantage of transparency. Furthermore, in this  
11 study we have also presented a cost-utility analysis that conforms to the recommendations of NICE.  
12 Nevertheless, there are also limitations. The practices recruited to the trial had a low proportion of  
13 ethnic minority patients, a slightly lower proportion of patients from deprived areas were judged to  
14 be eligible, and the proportion of eligible individuals consenting to participate in the trial was only  
15 50%.<sup>23</sup> These factors limit the generalisability of the results though none of these selection effects  
16 was large. Further, a particular difficulty in conducting economic evaluation with new service  
17 developments is ensuring that they are fully utilised,<sup>24</sup> particularly when conducting analysis from a  
18 long-run perspective, as here. Although there was a clear run-in period prior to data collection for  
19 the trial (ranging from 4 to 12 weeks in each of the four sites), to ensure that services were  
20 operating as well as they could, and a 2:1 randomisation ratio in favour of PhysioDirect was used,  
21 there was still considerable underutilisation of the new service. This was ameliorated by including a  
22 more fully utilised service within the sensitivity analysis. It should also be noted that, because of the  
23 use of a long-run perspective in the analysis, set up costs, which may, in the short-term be important  
24 in a financially constrained service, are not included here. Finally, because the differences in both  
25 costs and effects are small, there is still some uncertainty around the findings.

## 1 **The meaning of the study and implications for policy makers**

2 If the aim of health services is to achieve maximum health gain from an investment in health care,  
3 then PhysioDirect has a high probability of being more cost-effective than usual physiotherapy care.  
4 This research also, however, suggests that it cannot be assumed that PhysioDirect will reduce costs,  
5 although it could potentially do so if PhysioDirect services are managed efficiently. Both the costs  
6 and cost-effectiveness of services will depend on the productivity of physiotherapist time. If  
7 physiotherapists are able to use most of their time dealing directly with patients during sessions  
8 when they are available on the telephone, then the service will be less costly. This is most likely to be  
9 achieved by operating a call-back service and/or by operating the service on a large scale to even out  
10 fluctuations in demand. Operating a system on larger scale might also offer other economies of  
11 scale, particularly in terms of infrastructure. Further efficiencies may also be achieved if these  
12 services are, in the future, provided in conjunction with direct access for patients (rather than  
13 following referral from another health care professional), given that patients who self-refer are likely  
14 to contact the service with musculoskeletal problems of shorter duration,<sup>49</sup> and such patients may  
15 be particularly appropriate for the initial assessment and advice provided by a PhysioDirect service.  
16 More generally, the study has broader implications for telephone services, particularly around the  
17 implicit assumption that such services will inevitably be money saving. Here this assumption was  
18 found to be false, largely because the physiotherapists' time was underutilised during PhysioDirect  
19 clinic hours. Thus, for all such services, it will be important for policy makers to ensure that easy  
20 assumptions about the costs of these services are properly assessed in relation to factors such as  
21 how efficiently the service is run, and what proportion of patients are subsequently invited for face  
22 to face care following an initial telephone call.

## 24 **Unanswered questions and future research**

25 As services evolve, further research should explore the costs and benefits of PhysioDirect under  
26 different scenarios. These might include: comparing different skill levels of staff operating the

1  
2  
3 1 service; the inclusion of patient self-referrals in addition to GP referrals; the use, or otherwise, of  
4  
5 2 computerised support in assessing the patient; the extension to internet services (possibly combined  
6  
7 3 with cameras);<sup>50</sup> and the use of mobile 'smartphone' technology, for example in rapid assessment of  
8  
9 4 musculoskeletal injuries. In particular, however, it will be important to assess the costs and benefits  
10  
11 5 of services once they are more established and provided on a wider scale. The costs and benefits of  
12  
13 6 telehealth more generally need further exploration in relation to their cost effectiveness particularly  
14  
15 7 given the negative findings of the Whole Systems Demonstrator project evaluating telehealth  
16  
17 8 support and treatment for patients with long term conditions.<sup>51</sup> It would be helpful to identify those  
18  
19 9 characteristics that are likely to make services both more cost-effective and less costly.  
20  
21  
22  
23  
24  
25  
26  
27  
28  
29  
30  
31  
32  
33  
34  
35  
36  
37  
38  
39  
40  
41  
42  
43  
44  
45  
46  
47  
48  
49  
50  
51  
52  
53  
54  
55  
56  
57  
58  
59  
60

## References

1. Munro J, Nicholl J, O'Cathain A et al. Impact of NHS Direct on demand for immediate care: observational study. *Br Med J* 2000;321:150-153.
2. Lattimer V, Sassi F, George S et al. Cost analysis of nurse telephone consultation in out of hours primary care: evidence from a randomised controlled trial. *Br Med J* 2000;320:1053-1057.
3. Lattimer V, George S, Thompson F et al. Safety and effectiveness of nurse telephone consultation in out of hours primary care: randomised controlled trial. The South Wiltshire Out of Hours Project (SWOOP) Group. *Br Med J* 1998;317:1054-1059.
4. Pinnock H, Bawden R, Proctor S et al. Accessibility, acceptability, and effectiveness in primary care of routine telephone review of asthma: pragmatic, randomised controlled trial. *Br Med J* 2003;326:477-479.
5. Bunn F, Byrne G, Kendall S. Telephone consultation and triage: effects on health care use and patient satisfaction. *Cochrane Database of Systematic Reviews*.(4):CD004180, 2004. 2004;CD004180.
6. McKinstry B, Watson P, Pinnock H et al. Telephone consulting in primary care: a triangulated qualitative study of patients and providers. *Br J Gen Pract* 2009;59:e209-e218.
7. Picavet HS, Schouten JS. Musculoskeletal pain in the Netherlands: prevalences, consequences and risk groups, the DMC(3)-study. *Pain* 2003;102:167-178.
8. Jordan K, Ong BN, Croft P. Previous consultation and self reported health status as predictors of future demand for primary care. *J Epidemiol Commun Health* 2003;57:109-113.
9. McKormick A, Fleming D, and Charlton J *Morbidity statistics from general practice. Fourth national study 1991-1992 Serise MB5 no.3*. London: 1995.



10. Balage F, Mannion A, Pellise F, et al. Non-specific low back pain. *Lancet* 2012;379(9814):482-91.
11. Chuang L-H, Soares M, Tilbrook H, et al. A Pragmatic multicentred randomized controlled trial of yoga for chronic low back pain: economic evaluation. *Spine* 2012;37(18):1593-1601.
12. National Institute for Health and Clinical Excellence *Low back pain: early management of persistent non-specific low back pain. NICE clinical guideline 88.* 2009.
13. Department of Health. Physiotherapy Services Summary Information for 2004-2005, England <https://catalogue.ic.nhs.uk/publications/hospital/outpatients/nhs-phys-serv-summ-eng-2004-05/nhs-phys-serv-summ-eng-2004-05-rep.pdf> (accessed 16.08.2013)
14. Maniadakis N, Gray A. The economic burden of back pain in the UK. *Pain* 2000;84:95-103.
15. Salisbury C, Montgomery AA, Hollinghurst S et al. Effectiveness of PhysioDirect telephone assessment and advice services for patients with musculoskeletal problems: pragmatic randomised controlled trial. *Br Med J* 2013;346:f43.
16. Hodgson K. Kidderminster helpline proves a success. *Physiotherapy Frontline* 2001;7:22-23.
17. Taylor S, Ellis I, and Gallagher M. Patient satisfaction with a new physiotherapy telephone service for back pain patients. *Physiotherapy* 2002;88:645-657.
18. Clayson M and Woolvine M. Back pain direct clinic: a collaboration between general practitioners and physiotherapists. *Work Based Learning in Primary Care* 2004;2:38-43.
19. Turner D. An exploratory study of physiotherapy telephone assessment. *International Journal of Therapy and Rehabilitation* 2009;16:97-105.
20. Russell T, Truter P, Blumke R, Richardson B. The diagnostic accuracy of telerehabilitation for nonarticular lower-limb musculoskeletal disorders. *Telemed J & E-Health* 2010;16:585-594.

- 1  
2  
3 21. Patel S, Hossain FS, Colaco HB et al. The accuracy of primary care teams in diagnosing disorders  
4 of the shoulder. *J Eval Clin Pract* 2011;17:118-122.  
5  
6  
7  
8 22. Jette DU, Ardleigh K, Chandler K et al. Decision-making ability of physical therapists: physical  
9 therapy intervention or medical referral. *Phys Ther* 2006;86:1619-1629.  
10  
11  
12 23. Salisbury C, Foster NE, Hopper C et al. A pragmatic randomised controlled trial of the  
13 effectiveness and cost-effectiveness of 'PhysioDirect' telephone assessment and advice services  
14 for physiotherapy. *Health Technology Assessment (Winchester, England)* /20;17:1-157.  
15  
16  
17  
18 24. Coast J, Hensher M, Mulligan J, et al. Conceptual and practical difficulties with the economic  
19 evaluation of health services developments. *J Health Serv Res Policy* 2000;5:42-48.  
20  
21  
22 25. Coast, J. Is economic evaluation in touch with society's health values? *Br Med J* 2004;(329):1233-  
23 1236.  
24  
25  
26 26. Drummond M, Brown R, Fendrick M, et al. Use of Pharmacoeconomics Information—Report of  
27 the ISPOR Task Force on Use of Pharmacoeconomic/Health Economic Information in Health-Care  
28 Decision Making. *Value in Health* 2003;6 (4):407-416.  
29  
30  
31 27. National Institute for Health and Clinical Excellence. Guide to the Methods of Technology  
32 Appraisal <http://www.nice.org.uk/media/B52/A7/TAMethodsGuideUpdatedJune2008.pdf>  
33 (accessed 16.08.2013)  
34  
35  
36 28. Brooks R, with the EuroQol Group. EuroQol: the current state of play. *Health Policy* 1996;53-72.  
37  
38  
39 29. Dolan P, Gudex C, Kind P et al. *A social tariff for EuroQol: Results from a UK general population*  
40 *survey*. University of York, 1-9-1995.  
41  
42  
43  
44  
45  
46 30. Quality Metric. A community for measuring health outcomes using SF tools. <http://www.sf->  
47 [36.org/](http://www.sf-36.org/) (accessed 16.08.2013)  
48  
49  
50  
51  
52  
53  
54  
55  
56  
57  
58  
59  
60

- 1  
2  
3 31. Paterson, C. Measuring outcomes in primary care: a patient generated measure, MYMOP,  
4  
5 compared with the SF-36 survey. *Br Med J* 1996;312:1016-1020.  
6  
7  
8 32. Pham T, Van Der Heijde D, Lassere M et al. Outcome variables for osteoarthritis clinical trials:  
9  
10 The OMERACT-OARSI set of responder criteria. *J Rheumatol* 2003;30:1648-1654.  
11  
12  
13 33. British National Formulary. British National Formulary. <http://www.bnf.org/bnf> (accessed  
14  
15 16.08.2013)  
16  
17  
18 34. Database of Instruments for Resource Use Measurement (DIRUM) <http://www.dirum.org>  
19  
20 (accessed 16.08.2013)  
21  
22  
23 35. Curtis L. *Unit costs of health and social care 2009*. PSSRU, University of Kent, 2010.  
24  
25  
26  
27 36. Department of Health. NHS Reference costs 2009-2010.  
28  
29 <https://www.gov.uk/government/publications/nhs-reference-costs-2009-2010> (accessed  
30  
31 16.08.2013)  
32  
33  
34 37. National Health Service. NHS Drug tariff.  
35  
36 <http://www.nhsbsa.nhs.uk/PrescriptionServices/924.aspx> (accessed 16.08.2013)  
37  
38  
39 38. The Automobile Association. The AA schedule of motoring costs.  
40  
41 [http://www.theaa.com/motoring\\_advice/running\\_costs/index.html](http://www.theaa.com/motoring_advice/running_costs/index.html) (accessed 16.08.2013)  
42  
43  
44 39. Office for National Statistics. Annual survey of hours and earnings 2009  
45  
46 [http://www.ons.gov.uk/ons/rel/ashe/annual-survey-of-hours-and-earnings/2009-](http://www.ons.gov.uk/ons/rel/ashe/annual-survey-of-hours-and-earnings/2009-revised/index.html)  
47  
48 [revised/index.html](http://www.ons.gov.uk/ons/rel/ashe/annual-survey-of-hours-and-earnings/2009-revised/index.html) (accessed 16.08.2013)  
49  
50  
51  
52 40. Royal College of Nursing. Agenda for change – pay rates [http://www.nhscareers.nhs.uk/working-](http://www.nhscareers.nhs.uk/working-in-the-nhs/pay-and-benefits/agenda-for-change-pay-rates)  
53  
54 [in-the-nhs/pay-and-benefits/agenda-for-change-pay-rates](http://www.nhscareers.nhs.uk/working-in-the-nhs/pay-and-benefits/agenda-for-change-pay-rates) (accessed 16.08.2013)  
55  
56  
57  
58  
59  
60

- 1  
2  
3 41. Scott A, Simoens S, Heaney D, et al. What does GP out of hours care cost? An analysis of  
4 different models of out of hours care in Scotland. *Scot Med J* 2004;49:61-66.  
5  
6  
7  
8 42. O'Dowd A. Cost of out of hours care was 22% higher than predicted in England. *Br Med J*  
9 2006;332:1113.4.  
10  
11  
12  
13 43. Manca A, Hawkins N, Sculpher M. Estimating mean QALYs in trial-based cost-effectiveness  
14 analysis: the importance of controlling for baseline utility. *Health Econ* 2005;14:487-496.  
15  
16  
17  
18 44. van Buuren S, Boshuizen HC, Knook D L. Multiple Imputation of missing blood pressure  
19 covariates in survival analysis. *Stat Med* 1999;18:681-694:  
20  
21  
22  
23  
24 45. StataCorp *Statistical Software: Release 11*. College Station, TX: StataCorp LP. 2009.  
25  
26  
27 46. The CONSORT Group. CONSORT: the transparent reporting of trials [http://www.consort-](http://www.consort-statement.org)  
28 [statement.org](http://www.consort-statement.org) (accessed 16.08.2013)  
29  
30  
31  
32 47. Stamuli E, Bloor K, MacPherson H, et al. Cost-effectiveness of acupuncture for irritable bowel  
33 syndrome: findings from an economic evaluation conducted alongside a pragmatic randomised  
34 controlled trial in primary care. *BMC Gastroenterology* 2012; 12:149.  
35  
36  
37  
38  
39 48. Hill JC, Whitehurst DG, Lewis M, et al. Comparison of stratified primary care management for  
40 low back pain with current best practice (STarT Back): a randomised controlled trial. *Lancet*  
41 2011; 378 (9802): 1560-71.49. Leemrijse CJ, Swinkels IC, Veenhof C. Direct access to physical  
42 therapy in the Netherlands: results from the first year in community-based physical therapy.  
43  
44  
45  
46  
47  
48  
49  
50  
51  
52 50. Li LC, Townsend AF, Badley EM. Self-management interventions in the digital age: new  
53 approaches to support people with rheumatologic conditions. *Best Pract Res Clin Rheumatol*.  
54 2012;26(3):321-33.  
55  
56  
57  
58  
59  
60

1  
2  
3  
4  
5  
6  
7  
8  
9  
10  
11  
12  
13  
14  
15  
16  
17  
18  
19  
20  
21  
22  
23  
24  
25  
26  
27  
28  
29  
30  
31  
32  
33  
34  
35  
36  
37  
38  
39  
40  
41  
42  
43  
44  
45  
46  
47  
48  
49  
50  
51  
52  
53  
54  
55  
56  
57  
58  
59  
60

51. Henderson C, Knapp M, Fernandez J-L, et al. Cost effectiveness of telehealth for patients with long term conditions (Whole Systems Demonstrator telehealth questionnaire study): nested economic evaluation in a pragmatic, cluster randomised controlled trial. *Br Med J* 2013;34.j2065.

For peer review only

1  
2  
3 **1 Competing interestes**

4 We have read and understood the BMJ Group policy on declaration of interests and declare the  
5 following interests: none.  
6  
7  
8  
9  
10

11 **6 Funding**

12 The research was funded by the Medical Research Council (MRC) and managed by the National  
13 Institute for Health Research (NIHR) on behalf of the MRC-NIHR partnership. The funder had no role  
14 in: the study design; the collection, analysis, or interpretation of data; the writing of the report; the  
15 decision to submit the paper for publication. The researchers are all independent of the funders. All  
16 researchers had access to all the data.  
17  
18  
19  
20  
21

22 Nadine Foster is supported by a National Institute for Health Research NIHR Research Professorship  
23 NIHR-RP-011-015. The views expressed in this publication are those of the authors and not  
24 necessarily those of the NHS, the National Institute for Health Research or the Department of  
25 Health.  
26  
27  
28  
29  
30  
31

32 **19 Aurthors' contributions**

33 CS was principal investigator on the trial, SH took the lead on the economic evaluation. JC, NF, SG,  
34 JH, and AM were co-applicants and contributed to the conception and design. SH, JC and JB carried  
35 out the analysis with help from CS and AM, and all authors contributed to the interpretation of the  
36 data. SH and JC wrote the first draft of the paper with all authors contributing to subsequent  
37 revisions. All authors have seen and approved the final version.  
38  
39  
40  
41  
42  
43  
44

45 **27 Acknowledgments**

46 We would like to dedicate this paper to the memory of Cherida Hopper, trial manager of the  
47 PhysioDirect study, who sadly died in June 2013.  
48  
49  
50

51 We thank the patients who contributed to this research; the physiotherapists, administrative staff,  
52 managers and commissioners who supported the set up and delivery of the trial in the four primary  
53 care trusts; participating general practices; the research support staff in Bristol and Keele; members  
54  
55  
56  
57  
58  
59  
60

1  
2  
3  
4  
5  
6  
7  
8  
9  
10  
11  
12  
13  
14  
15  
16  
17  
18  
19  
20  
21  
22  
23  
24  
25  
26  
27  
28  
29  
30  
31  
32  
33  
34  
35  
36  
37  
38  
39  
40  
41  
42  
43  
44  
45  
46  
47  
48  
49  
50  
51  
52  
53  
54  
55  
56  
57  
58  
59  
60

- 1 of the Trial Steering Committee and Data Monitoring Committee; and Jill Gamlin and Nick Deane
- 2 who developed the PhysioDirect assessment algorithms and software used in this trial.

For peer review only

Table 1: Data sources and unit costs

|                                                 | Unit cost (£)                                                          |
|-------------------------------------------------|------------------------------------------------------------------------|
| <b>Primary and Community Care</b> <sup>35</sup> |                                                                        |
| General Practitioner                            |                                                                        |
| Surgery                                         | 27.00                                                                  |
| Telephone consultation                          | 16.00                                                                  |
| Home visit                                      | 91.00                                                                  |
| Practice nurse                                  |                                                                        |
| Surgery                                         | 10.00                                                                  |
| Telephone consultation                          | 5.93                                                                   |
| Health Care Assistant/phlebotomist              |                                                                        |
| Surgery                                         | 6.92                                                                   |
| District Nurse                                  |                                                                        |
| Home visit                                      | 16.33                                                                  |
| <b>Out of Hours</b> <sup>41,42</sup>            |                                                                        |
| General practitioner                            | 23.50                                                                  |
| <b>Hospital care</b> <sup>36</sup>              |                                                                        |
| A&E                                             | 103.00                                                                 |
| Outpatient visits                               | By Healthcare Resource Group,<br>differentiated by first and follow-up |
| Inpatient stays                                 | By Healthcare Resource Group                                           |
| <b>Prescribed medication</b> <sup>33</sup>      | per item, by name, strength and amount                                 |
| <b>Mileage</b> <sup>38</sup>                    | 0.4612                                                                 |
| <b>Time off work</b> <sup>39</sup>              | Median national wage by age and sex                                    |



Table 2: Number of physiotherapy consultations and mean duration, by type and group

|                                   |                    | Usual care (n=743) | PhysioDirect (n=1506) |
|-----------------------------------|--------------------|--------------------|-----------------------|
| <b>Face-to-face appointments</b>  | mean (SD) number   | 3.11(2.63)         | 1.91(2.72)            |
|                                   | mean (SD) total    | 107.51(88.92)      | 64.20(89.31)          |
|                                   | duration (minutes) |                    |                       |
| <b>Telephone appointments</b>     | mean (SD) number   | 0.13(0.44)         | 0.96 (0.63)           |
|                                   | mean (SD) total    | 4.21(14.64)        | 27.37(19.92)          |
|                                   | duration (minutes) |                    |                       |
| <b>Home visits</b>                | mean (SD) number   | 0.00 (0.06)        | 0.00 (0.06)           |
|                                   | mean (SD) total    | 0.14(2.27)         | 0.12(2.12)            |
|                                   | duration (minutes) |                    |                       |
| <b>All physiotherapy contacts</b> | mean (SD) number   | 3.25(2.70)         | 2.87(2.94)            |
|                                   | mean (SD) total    | 111.86(90.50)      | 91.70 (95.40)         |
|                                   | duration (minutes) |                    |                       |

Table 3: Health services resource use, by group. All available data.

|                                                 | Mean (SD) number of consultations |                   |             |                    |
|-------------------------------------------------|-----------------------------------|-------------------|-------------|--------------------|
|                                                 | n                                 | usual care        | n           | PhysioDirect       |
| GP consultations                                | 739                               | 0.77(1.47)        | 1484        | 0.87 (1.68)        |
| Nurse consultations                             | 739                               | 0.04 (0.22)       | 1484        | 0.06 (0.32)        |
| Other primary care consultations                | 739                               | 0.02(0.14)        | 1484        | 0.02 (0.17)        |
| <b>Total number of primary care contacts</b>    | <b>739</b>                        | <b>0.83(1.56)</b> | <b>1484</b> | <b>0.96 (1.84)</b> |
| Number of prescriptions                         | 728                               | 1.36 (2.73)       | 1469        | 1.68 (3.72)        |
| A&E (visits)                                    | 467                               | 0.02 (0.01)       | 912         | 0.03 (0.01)        |
| Out-patient (consultations)                     | 467                               | 0.17 (0.83)       | 910         | 0.35 (1.03)        |
| In-patient stays (Finished Consultant Episodes) | 465                               | 0.01 (0.10)       | 910         | 0.01 (0.10)        |

**Table 4: Patient and societal resource use, by group. All available data.**

| Number (%) reporting:                             | n   | usual care | n    | PhysioDirect |
|---------------------------------------------------|-----|------------|------|--------------|
| Expenditure on travel to physiotherapy            | 462 | 242 (52.4) | 1232 | 308 (25.8)   |
| Expenditure on travel to primary care             | 669 | 116 (17.3) | 1337 | 237 (17.7)   |
| Expenditure on over-the-counter medication        | 506 | 256 (50.6) | 1028 | 512 (49.8)   |
| Expenditure on prescriptions                      | 559 | 264 (47.2) | 1085 | 508 (46.8)   |
| Expenditure on private therapy                    | 484 | 89 (18.4)  | 934  | 167 (17.9)   |
| Equipment purchase                                | 480 | 139 (29.0) | 939  | 233 (24.8)   |
| Payments for extra domestic help                  | 459 | 35 (7.6)   | 928  | 76 (8.2)     |
| Loss of earnings                                  | 598 | 30 (5.5)   | 1209 | 64 (5.3)     |
| Any time off to attend physiotherapy consultation | 692 | 218 (31.5) | 1416 | 380 (26.8)   |
| Work has been affected because of condition       | 477 | 141 (29.6) | 959  | 317 (33.1)   |

Table 5: Mean total cost per patient, by group and category. All available data<sup>a</sup>.

|                                            | usual care |                         | PhysioDirect |                         | Incremental difference<br>(95% Confidence<br>Interval) |
|--------------------------------------------|------------|-------------------------|--------------|-------------------------|--------------------------------------------------------|
|                                            | n          | mean (SD) cost          | n            | mean (SD) cost          |                                                        |
| <b>Physiotherapy services</b>              |            |                         |              |                         |                                                        |
| Face-to-face appointments                  | 743        | £64.42 (£53.00)         | 1506         | £38.76 (£53.92)         | -£25.66 (-£30.37 to -£20.95)                           |
| Telephone appointments                     | 743        | £5.22 (£18.01)          | 1506         | £35.17 (£26.34)         | £29.94 (£27.84 to £32.05)                              |
| Home visits                                | 743        | £0.08 (£1.33)           | 1506         | £0.08 (£1.46)           | £0.00 (-£0.12 to £0.13)                                |
| <b>Total physiotherapy cost</b>            | <b>743</b> | <b>£69.73 (£56.17)</b>  | <b>1506</b>  | <b>£74.01 (£63.97)</b>  | <b>£4.28 (-£1.12 to £9.69)</b>                         |
| <b>Primary care services</b>               |            |                         |              |                         |                                                        |
| GP consultations                           | 739        | £19.21 (£35.91)         | 1484         | £21.69 (£41.66)         | £2.48 (-£1.04 to £6.00)                                |
| Nurse consultations                        | 739        | £0.44 (£2.37)           | 1484         | £0.61 (£3.17)           | £0.16 (-£0.10 to £0.42)                                |
| Other primary care consultations           | 739        | £0.03 (£0.57)           | 1484         | £0.07 (£1.31)           | £0.05 (-£0.05 to £0.15)                                |
| <b>Total primary care cost</b>             | <b>739</b> | <b>£19.68 (£36.68)</b>  | <b>1484</b>  | <b>£22.37 (£42.83)</b>  | <b>£2.69 (-£0.92 to £6.30)</b>                         |
| <b>Medication cost</b>                     | 728        | £11.04 (£51.61)         | 1469         | £10.33 (£55.43)         | -£0.72 (-£5.53 to £4.10)                               |
| <b>Hospital services</b>                   |            |                         |              |                         |                                                        |
| A&E                                        | 467        | £1.99 (£17.12)          | 912          | £3.17 (£20.84)          | £1.18 (-£1.01 to £3.37)                                |
| Out-patient                                | 467        | £30.74 (£98.36)         | 910          | £38.35 (£126.05)        | £7.61 (-£5.50 to £20.72)                               |
| In-patient                                 | 465        | £51.02 (£520.48)        | 910          | £34.99 (£399.62)        | -£16.03 (-£65.70 to £33.64)                            |
| <b>Total hospital cost</b>                 | <b>459</b> | <b>£83.04 (£561.68)</b> | <b>899</b>   | <b>£77.00 (£446.24)</b> | <b>-£6.04 (-£60.99 to £48.91)</b>                      |
| <b>Personal expenditure</b>                |            |                         |              |                         |                                                        |
| Cost of all calls to physiotherapy service | 743        | £0.97 (£0.99)           | 1506         | £1.75 (£1.29)           | £0.79 (£0.68 to £0.89)                                 |
| Travel to physiotherapy                    | 462        | £6.11 (£11.48)          | 1232         | £3.11 (£8.51)           | -£3.01 (-£4.01 to -£2.00)                              |
| Travel for primary care                    | 669        | £0.65 (£2.93)           | 1337         | £0.75 (£4.10)           | £0.11 (-£0.24 to £0.45)                                |
| Over-the-counter medication                | 490        | £7.67 (£14.09)          | 987          | £8.61 (£22.38)          | £0.94 (-£1.23 to £3.11)                                |
| Cost of prescriptions                      | 553        | £2.72 (£8.95)           | 1076         | £2.67 (£8.33)           | -£0.05 (-£0.93 to £0.82)                               |

|                                             |     |                    |      |                    |                               |
|---------------------------------------------|-----|--------------------|------|--------------------|-------------------------------|
| Private therapy                             | 475 | £21.98 (£70.34)    | 915  | £39.34 (£296.94)   | £17.36 (-£9.76 to £44.48)     |
| Equipment purchase                          | 473 | £17.16 (£169.12)   | 924  | £9.12 (£56.42)     | -£8.04 (-£20.08 to £4.00)     |
| Extra domestic help                         | 451 | £10.93 (£64.31)    | 905  | £13.68 (£96.02)    | £2.75 (-£7.07 to £12.56)      |
| Cost associated with loss of earnings       | 598 | £46.69 (409.72)    | 1209 | £82.78 (£885.85)   | £36.09 (-£38.63 to £110.81)   |
| <b>Value of time off work</b>               |     |                    |      |                    |                               |
| Time off work to attend physiotherapy       | 598 | £12.90 (£38.99)    | 1211 | £11.91 (£57.86)    | £0.95 (-£3.81 to £5.70)       |
| Time off work associated with the condition | 452 | £265.92 (£1350.82) | 884  | £226.61 (£1139.84) | £111.31 (-£159.04 to £379.67) |

<sup>a</sup> Uses all available data, so denominators differ by category.

Table 6: Cost-consequences. All available data<sup>a</sup>.

|                                                  | n (%)     | usual care                 | n (%)      | PhysioDirect             | Incremental difference<br>(95% Confidence<br>Interval)                     |
|--------------------------------------------------|-----------|----------------------------|------------|--------------------------|----------------------------------------------------------------------------|
| <b>Mean (SD) Cost</b>                            |           |                            |            |                          |                                                                            |
| Total physiotherapy cost                         | 743       | £69.73 (£56.17)            | 1506       | £74.01<br>(£63.97)       | £4.28<br>(-£1.12 to £9.69)                                                 |
| Cost of NHS services including<br>physiotherapy  | 453 (61%) | £189.19<br>(£557.61)       | 888 (59%)  | £196.43<br>(£472.02)     | £7.24<br>(-£49.68 to £64.10)                                               |
| Total personal expenditure                       | 310 (42%) | £121.10 (£575)             | 714 (47%)  | £166.40<br>(£1040.27)    | £45.30<br>(-£78.01 to £168.61)                                             |
| Total value of all time off<br>work <sup>b</sup> | 451 (61%) | £276.75<br>(£1355.00)      | 883 (59%)  | £240.74<br>(£1147.20)    | -£36.01<br>(-£174.69 to £102.66)                                           |
| <b>Consequences<sup>c</sup></b>                  |           |                            |            |                          |                                                                            |
|                                                  |           |                            |            |                          | <b>Difference/odds ratio<br/>(95% confidence<br/>interval)<sup>d</sup></b> |
| SF36v2 PCS                                       | 629 (85%) | 44.18 (10.84)              | 1283 (85%) | 43.50 (10.94)            | -0.01 (-0.80 to 0.79)                                                      |
| MYMOP <sup>e</sup>                               | 518 (70%) | 2.40 (1.38)                | 1033 (69%) | 2.40 (1.43)              | -0.02 (-0.16 to 0.11)                                                      |
| Global improvement score                         | 501 (67%) | 4.07 (1.40)                | 1001 (66%) | 4.01 (1.44)              | -0.08 (-0.23 to 0.08)                                                      |
| Response to treatment<br>(OMERACT OARSI)         | 510 (69%) | 197 (38.6%)                | 1029 (68%) | 430 (41.8%)              | 1.14 (0.92 to 1.43)                                                        |
| Waiting time to first<br>assessment and advice   | 618 (83%) | 34 (20 to 55) <sup>f</sup> | 1281 (85%) | 7 (4 to 15) <sup>f</sup> | 0.32 (0.29 to 0.35) <sup>g</sup>                                           |
| Patient overall satisfaction                     | 367 (49%) | 79.7 (26.5)                | 739 (49%)  | 75.9 (28.3)              | -3.8 (-7.3 to -0.3)                                                        |
| QALYs <sup>h</sup>                               | 454 (61%) | 0.322 (0.079)              | 881 (58%)  | 0.331 (0.082)            | 0.009 (-0.000 to 0.018)                                                    |

<sup>a</sup> Uses all available data, so denominators differ by category

<sup>b</sup> Total of time off to attend physiotherapy and associated with the condition

<sup>c</sup> At 6 month follow-up time point

<sup>d</sup> Adjusted for outcome at baseline, gender, age, referral problem, PCT

<sup>e</sup> Lower score is better

<sup>f</sup> Median (IQR)

<sup>g</sup> Accelerated failure time analysis

<sup>h</sup> Adjusted for outcome at baseline

**Table 7: Cost-effectiveness analysis.** Includes cases with complete data on NHS costs and QALYs

|                                                                            | n   | usual care<br>mean (SD) cost | n   | PhysioDirect<br>Mean (SD) cost | Incremental difference<br>(95% CI) |
|----------------------------------------------------------------------------|-----|------------------------------|-----|--------------------------------|------------------------------------|
| <b>Cost of physiotherapy</b>                                               | 432 | £78.77 (£57.08)              | 840 | £86.75 (£65.47)                | £7.98 (£0.69 to £15.27)            |
| <b>Cost of NHS services other than<br/>physiotherapy</b>                   | 432 | £100.91 (£502.02)            | 840 | £112.23 (£476.91)              | £11.32 (-£45.08 to £67.72)         |
| <b>Total cost including physiotherapy</b>                                  | 432 | £179.68 (£504.73)            | 840 | £198.98 (482.12)               | £19.30 (-£37.60 to £76.19)         |
| <b>QALYs</b>                                                               | 432 | 0.325 (0.077)                | 840 | 0.332 (0.081)                  | 0.007 (-0.003 to 0.016)            |
| <b>Incremental cost-effectiveness ratio (ICER)</b>                         |     |                              |     |                                | £2,889                             |
| <b>Median Net Monetary Benefit (95% CI) based on bootstrapped results:</b> |     |                              |     |                                |                                    |
| <b>λ=£20,000</b>                                                           |     |                              |     |                                | £117 (-£86 to £310)                |
| probability of intervention being cost-effective                           |     |                              |     |                                | 0.88                               |
| <b>λ=£30,000</b>                                                           |     |                              |     |                                | £184 (-£106 to £461)               |
| probability of intervention being cost-effective                           |     |                              |     |                                | 0.90                               |

Table 8: Sensitivity Analysis

|                                                                     | Usual care |                   | PhysioDirect |                   | Incremental difference<br>(95% confidence interval) |
|---------------------------------------------------------------------|------------|-------------------|--------------|-------------------|-----------------------------------------------------|
|                                                                     | n          | mean (SD)         | n            | mean (SD)         |                                                     |
| <b>(1) mimicking an efficient service</b>                           |            |                   |              |                   |                                                     |
| Cost of physiotherapy                                               | 432        | £76.56 (£55.34)   | 840          | £72.22 (£61.55)   | -£4.34 (-£11.25 to £2.57)                           |
| Cost of NHS services                                                | 432        | £100.91 (£502.02) | 840          | £112.23 (476.91)  | £11.32 (-£45.08 to £67.72)                          |
| Total cost                                                          | 432        | £177.46 (£504.49) | 840          | £184.44 (£481.83) | £6.98 (-£49.89 to £63.85)                           |
| Incremental cost-effectiveness ratio (ICER)                         |            |                   |              |                   | £1,045                                              |
| Median Net Monetary Benefit (95% CI) based on bootstrapped results: |            |                   |              |                   |                                                     |
| λ=£20,000                                                           |            |                   |              |                   | £127 (-£74 to £319)                                 |
| λ=£30,000                                                           |            |                   |              |                   | £193 (-£95 to £473)                                 |
| <b>(2) Excluding hospital costs</b>                                 |            |                   |              |                   |                                                     |
| Cost of physiotherapy                                               | 448        | £78.49 (£57.14)   | 869          | £86.84 (£65.25)   | £8.35 (£1.21 to £15.50)                             |
| Cost of NHS services excluding secondary care                       | 448        | £33.75 (£76.46)   | 869          | £33.49 (£63.76)   | -£0.25 (-£8.05 to £7.54)                            |
| Total cost of NHS services including physiotherapy                  | 448        | £112.23 (£99.621) | 869          | £120.33 (£98.85)  | £8.10 (-£3.21 to £19.41)                            |
| Incremental cost-effectiveness ratio (ICER)                         |            |                   |              |                   | £1,084                                              |
| Median Net Monetary Benefit (95% CI) based on bootstrapped results: |            |                   |              |                   |                                                     |
| λ=£20,000                                                           |            |                   |              |                   | £142 (-£41 to £324)                                 |
| λ=£30,000                                                           |            |                   |              |                   | £217 (-£56 to £489)                                 |
| <b>(3) Imputed data</b>                                             |            |                   |              |                   |                                                     |
| Cost of physiotherapy                                               | 743        | £69.73 (£56.17)   | 1506         | £74.01 (£63.97)   | £4.28 (-£1.12 to £9.69)                             |
| Cost of NHS services                                                | 743        | £131.37 (£465.49) | 1506         | £131.51 (£384.36) | £0.17 (-£36.13 to £36.48)                           |
| Total cost of NHS services including physiotherapy                  | 743        | £201.09 (£467.51) | 1506         | £205.55 (£390.04) | £4.46 (-£32.22 to £41.14)                           |
| Quality Adjusted Life Years                                         | 743        | 0.320 (0.003)     | 1506         | 0.322 (0.002)     | 0.002 (-0.006 to 0.009)                             |
| Incremental cost-effectiveness ratio (ICER)                         |            |                   |              |                   | £2,260                                              |
| Median Net Monetary Benefit (95% CI) based on bootstrapped results: |            |                   |              |                   |                                                     |
| λ=£20,000                                                           |            |                   |              |                   | £34 (-£119 to £193)                                 |
| λ=£30,000                                                           |            |                   |              |                   | £52 (-£172 to £285)                                 |
| <b>(4) Imputed data and 'efficient' service</b>                     |            |                   |              |                   |                                                     |
| Cost of physiotherapy                                               | 743        | £67.61 (£54.19)   | 1506         | £61.41 (£59.13)   | -£6.20 (-£11.26 to -£1.14)                          |
| Cost of NHS services                                                | 743        | £131.37 (£465.49) | 1506         | £131.54 (384.36)  | £0.17 (-£36.13 to £36.48)                           |
| Total cost of NHS services including physiotherapy                  | 743        | £198.98 (£467.48) | 1506         | £192.95 (£389.52) | -£6.02 (-£42.68 to £30.63)                          |
| Quality Adjusted Life Years                                         | 743        | 0.320 (0.003)     | 1506         | 0.322(0.002)      | 0.002 (-0.006 to 0.009)                             |
| Incremental cost-effectiveness ratio (ICER)                         |            |                   |              |                   | -£3,054                                             |
| Median Net Monetary Benefit (95% CI) based on bootstrapped results: |            |                   |              |                   |                                                     |
| λ=£20,000                                                           |            |                   |              |                   | £47 (-£113 to £202)                                 |
| λ=£30,000                                                           |            |                   |              |                   | £67 (-£165 to £293)                                 |



Figure 1. Cost-effectiveness acceptability curve showing the probability that the intervention is cost-effective at different levels of willingness to pay for one Quality Adjusted Life Year

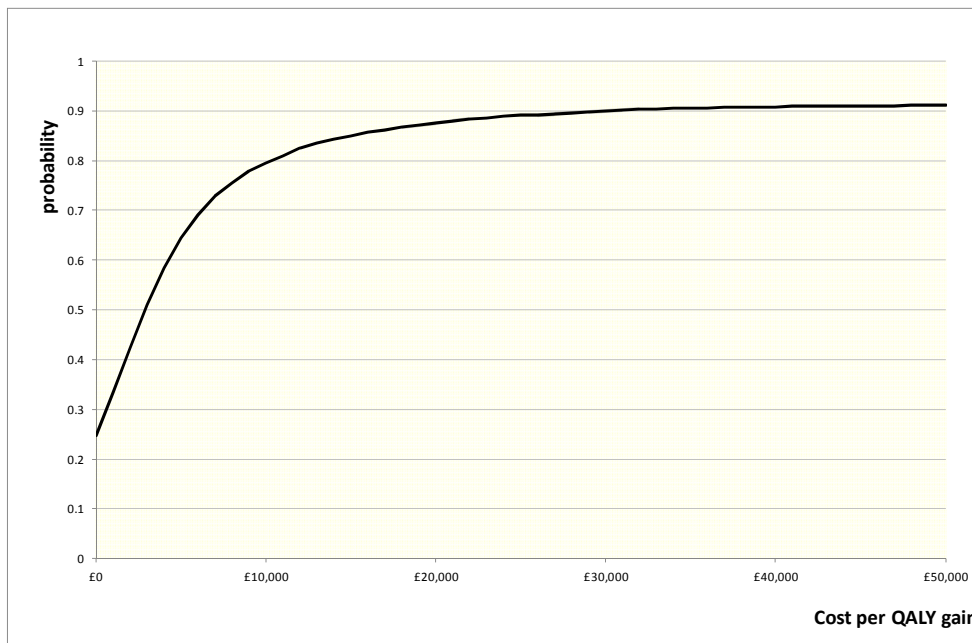

Figure 2. Cost-effectiveness acceptability curve showing the probability that the intervention is cost-effective at different levels of willingness to pay for one Quality Adjusted Life Year: Sensitivity Analyses

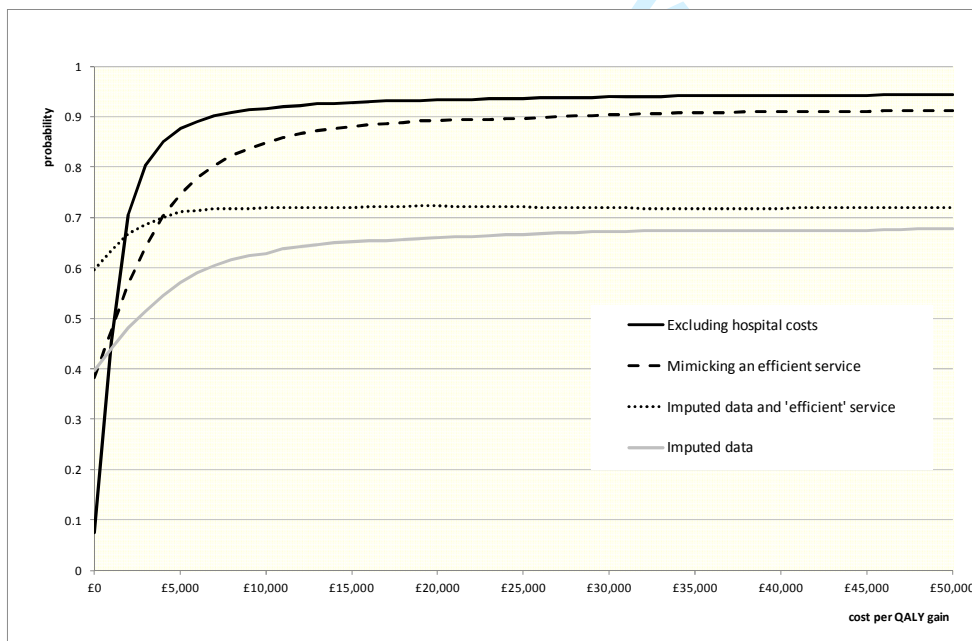

1  
2  
3  
4  
5  
6  
7 **A pragmatic randomised controlled trial of 'PhysioDirect' telephone**  
8 **assessment and advice services for patients with musculoskeletal problems:**  
9 **economic evaluation**  
10

11 Sandra Hollinghurst, Joanna Coast, John Busby, Annette Bishop, Nadine E Foster, Angelo Franchini,  
12 Sean Grove, Jeanette Hall, Cherida Hopper, Surinder Kaur, Alan A Montgomery, Chris Salisbury  
13

14  
15 Sandra Hollinghurst, PhD. Senior Lecturer in Health Economics<sup>1</sup>

16 Joanna Coast, PhD. Professor of Health Economics<sup>2</sup>

17 John Busby, MSc. Research Assistant in Health Economics<sup>1</sup>

18 Annette Bishop, PhD. Research Physiotherapist<sup>3</sup>

19 Nadine E Foster, D.Phil. NIHR Professor of Musculoskeletal Health in Primary Care<sup>3</sup>

20 Angelo Franchini, MSc. Research Associate<sup>4</sup>

21 Sean Grove, MSc. Clinical Lead Physiotherapy<sup>5</sup>

22 Jeanette Hall, Grad Dip Phys. Operational lead for Outpatient Physiotherapy<sup>5</sup>

23 Cherida Hopper, PhD. Trial Manager<sup>1</sup>

24 Surinder Kaur, BSc. Research Associate<sup>1</sup>

25 Alan A Montgomery, PhD. Professor of Medical Statistics and Clinical Trials<sup>6</sup>

26 Chris Salisbury, MD. Professor of Primary Health Care<sup>1</sup>  
27  
28

29 <sup>1</sup>Centre for Academic Primary Care, School of Social and Community Medicine, University of Bristol,  
30 UK

31 <sup>2</sup>Health Economics Unit, School of Health & Population Sciences, University of Birmingham, UK

32 <sup>3</sup>Arthritis Research UK Primary Care Centre, Primary Care Sciences, Keele University, UK

33 <sup>4</sup>Imperial Clinical Trials Unit, School of Public Health Medicine, Imperial College, London, UK

34 <sup>5</sup>Musculoskeletal Outpatient Department, Bristol Community Health, UK

35 <sup>6</sup>Nottingham Clinical Trials Unit, Queen's Medical Centre, Nottingham, UK  
36  
37  
38

39 **Correspondence:**

40 Sandra Hollinghurst, School of Social and Community Medicine, University of Bristol, Canynge Hall,  
41 39 Whatley Road, Bristol BS8 2PS

42 s.p.hollinghurst@bristol.ac.uk

43 0117 331 3901  
44  
45  
46

47 Key Words: economic evaluation; physiotherapy; telehealth; primary care; cost & cost analysis  
48  
49  
50  
51  
52  
53  
54  
55  
56  
57  
58  
59  
60

1  
2  
3  
4  
5  
6  
7 **A pragmatic randomised controlled trial of 'PhysioDirect' telephone assessment and**  
8 **advice services for patients with musculoskeletal problems: economic evaluation**  
9

10 **ABSTRACT**

11  
12 **Objectives**

13  
14 To compare the cost-effectiveness of PhysioDirect with usual physiotherapy care for patients  
15 with musculoskeletal problems.  
16

17  
18 **Design**

19  
20 (i) Cost-consequences comparing cost to the NHS, to patients, and the value of lost productivity  
21 with a range of outcomes. (ii) Cost-utility analysis comparing cost to the NHS with Quality  
22 Adjusted Life Years (QALYs)  
23

24  
25 **Setting**

26  
27 Four physiotherapy services in England  
28

29  
30 **Participants**

31  
32 Adults (18+) referred by their general practitioner or self-referred for physiotherapy.  
33

34  
35 **Interventions**

36  
37 PhysioDirect involved telephone assessment and advice followed by face-to-face care if needed.  
38 Usual care patients were placed on a waiting list for face-to-face care.  
39

40 **Primary and secondary outcome measures**

41  
42 Primary clinical outcome: physical component summary ~~measure~~ from the SF-36v2 at six months.

43 Also included in the cost-consequences~~Secondary outcomes included~~: Measure Yourself Medical  
44 Outcomes Profile; a Global Improvement Score; response to treatment; patient satisfaction; waiting  
45 time.  
46

47  
48 Outcome for the cost-utility analysis: QALYs  
49

50 **Results**

51  
52 2249 patients took part (1506 PhysioDirect; 743 usual care).  
53  
54  
55  
56  
57  
58  
59  
60

1  
2  
3  
4  
5  
6  
7 (i) Cost-consequences: there was no evidence of a difference between the two groups in the cost of  
8 physiotherapy, other NHS services, personal costs or value of time off work. Outcomes were also  
9 similar.  
10

11 (ii) Cost-utility analysis based on complete cases (n=1,272). Total NHS costs, including the cost of  
12 physiotherapy were higher in the PhysioDirect group by £19.30 (95% CI: -£37.60 to £76.19) and  
13 there was a QALY gain of 0.007 (95% CI: -0.003 to 0.016). The incremental cost-effectiveness ratio  
14 was £2,889 and the net monetary benefit at  $\lambda$ =£20,000 was £117 (95% CI: -£86 to £310)  
15  
16

### 17 **Conclusions**

18 PhysioDirect may be a cost-effective alternative to usual physiotherapy care, though only with  
19 careful management of staff time. Physiotherapists providing the service must be more fully  
20 occupied than was possible under trial conditions: consideration should be given to the scale of  
21 operation, opening times of the service, and flexibility in the methods used to contact patients.  
22  
23  
24  
25  
26  
27  
28  
29  
30  
31  
32  
33  
34  
35  
36  
37  
38  
39  
40  
41  
42  
43  
44  
45  
46  
47  
48  
49  
50  
51  
52  
53  
54  
55  
56  
57  
58  
59  
60

## Article Summary

### Article focus

- What is the cost of providing PhysioDirect telephone assessment and advice, followed by face-to-face care if needed, to adults with musculoskeletal pain problems, compared with usual physiotherapy care?
- What are the patient benefits of PhysioDirect compared with usual care?
- Is PhysioDirect a cost-effective alternative to usual care for primary care patients with musculoskeletal conditions?

### Key messages

- There was very little difference between the two groups in terms of cost or outcomes
- PhysioDirect has potential to be a cost-effective alternative to usual care but requires careful management of staff resources

### Strengths and limitations of this study

- Findings are based on a large sample of patients with a wide range of musculoskeletal problems based in diverse locations
- The study takes a broad perspective, including the health care provider, patients, and a valuation of lost productivity
- Physiotherapists were constrained by trial conditions and were underutilised

## 1 INTRODUCTION

2 There is a trend to explore the use of new technology in the delivery of health care, particularly the  
 3 use of telephone assessment and triage, as for example in NHS Direct.<sup>1</sup> These services aim to better  
 4 manage patient demand, and research has shown that telephone based services can be safe,  
 5 clinically accurate, cost-effective, acceptable to patients, and reduce the workload of clinicians,<sup>2-5</sup>  
 6 although there have been some concerns about using telephone triage in patients presenting with  
 7 acute health problems.<sup>6</sup>

8  
 9 Musculoskeletal pain problems are one of the most common causes of disability. Over a quarter of  
 10 all patients registered in general practice will consult at least once for a musculoskeletal problem  
 11 each year,<sup>7,8</sup> with musculoskeletal pain accounting for around 15% of all GP consultations.<sup>9</sup> This high

12 prevalence of musculoskeletal problems<sup>10</sup> results in large direct and indirect healthcare costs:<sup>10</sup>

13 ~~estimated for for example, low back pain alone has recently been estimated to cost the UK economy~~  
 14 ~~£15.84 billion a year at £10,668 million for the UK in 1998<sup>11</sup> and rising substantially since then.<sup>11,12</sup>~~

15 Most patients are managed with advice and analgesia but many are referred to physiotherapists,  
 16 with 1.23 million new referrals each year from GPs and 4.4 million in total.<sup>13</sup> Ensuring timely access  
 17 to physiotherapy has long been an issue within the UK NHS, with waiting times of more than four  
 18 months in some areas. Patients may suffer unnecessary pain and disability, and there are high  
 19 productivity losses: for example, back pain accounts for some 120 million days of certified absence  
 20 from work each year.<sup>14</sup> Delay may also cause NHS inefficiencies on the one hand as some patients  
 21 recover and do not attend their physiotherapy appointment when it finally arrives, whilst on the  
 22 other, some patients continue to access more expensive forms of treatment whilst awaiting their  
 23 appointment.

24  
 25 In response to these problems, physiotherapy services have drawn on the new service models and a  
 26 range of 'PhysioDirect' services have been developed. These vary in format though they commonly

Formatted: Superscript

Formatted: Superscript

1  
2  
3  
4  
5  
6  
7 1 involve a physiotherapist assessing a patient's musculoskeletal pain problem over the telephone,  
8  
9 2 sometimes supported by computerised assessment templates, offering tailored, self-management  
10  
11 3 advice supplemented by written advice sent by post. Alternatively if the assessment findings  
12  
13 4 suggest that face-to-face care is needed this is arranged, and patients who are initially managed by  
14  
15 5 telephone advice can phone back for further advice and/or face-to-face treatment.<sup>154</sup> There is,  
16  
17 6 however, limited evidence about the costs and benefits of this approach within physiotherapy. Local  
18  
19 7 evaluations and non-randomised studies suggest that these services may be popular with patients<sup>165-</sup>  
20  
21 8 <sup>187</sup> and diagnoses made by physiotherapists over the telephone are comparable to diagnoses  
22  
23 9 reached in face-to-face assessments<sup>198-219</sup> although there is some concern that the experience of the  
24  
25 10 physiotherapist providing the telephone assessment might be important.<sup>198,221</sup>  
26  
27 11

27 12 In particular there is no information about the costs or cost-effectiveness of PhysioDirect services,  
28  
29 13 despite: (i) a major underlying rationale for their development being to generate greater efficiency  
30  
31 14 in the use of resources; and (ii) a ready presumption that telephone-based services result in lower  
32  
33 15 costs (by assuming that services better use physiotherapy time, use less costly telephone  
34  
35 16 consultations and reduce rates of appointment non-attendance). Without such evidence, preferably  
36  
37 17 generated alongside high quality primary evidence obtained using rigorous study designs, it remains  
38  
39 18 unclear whether such services should be more widely implemented. This paper reports the results of  
40  
41 19 an economic evaluation conducted alongside a randomised controlled trial powered to generate  
42  
43 20 evidence on whether PhysioDirect services for primary care patients with musculoskeletal problems  
44  
45 21 produce equivalent outcomes to usual face-to-face services.  
46  
47 22  
48  
49 23

## 50 24 **METHOD**

### 51 52 25 **Study design**

1 We conducted an economic evaluation alongside a randomised controlled trial to establish the cost-  
 2 effectiveness of PhysioDirect compared with usual care based only on face-to-face treatment over a  
 3 period of 6 months. The trial and its clinical findings have been reported in full elsewhere.<sup>15,23,32</sup> The

4 aim of the evaluation was to provide information about the long-run costs and benefits of the

5 alternative methods of running a physiotherapy service for this patient group so with that in mind

6 we excluded the initial set up costs associated with establishing the new telephone service, including

7 the training undertaken by the practitioners.<sup>24</sup> As the nature of the intervention suggests there could

8 be an impact on patients' costs, and as it is known that musculoskeletal conditions account for a

9 considerable amount of time off work<sup>14</sup> we chose to use a cost-consequences approach, comparing

10 cost from all three perspectives (health care provider, patients and carers, lost productivity) with a

11 range of clinical outcomes.<sup>25,26</sup> However, the perspective of greatest interest to UK policy makers is

12 the health and social care provider,<sup>23</sup> so we also conducted a cost-utility analysis to compare cost to

13 the National Health Service (NHS) with Quality-Adjusted Life-Years (QALYs). However, the nature of

14 the intervention suggests there could be an impact on patients' costs, and as it is known that

15 musculoskeletal conditions account for a considerable amount of time off work<sup>10,11</sup> we included

16 these perspectives in the analysis. We used a cost-consequences approach to compare cost from all

17 three perspectives (health care provider, patients and carers, lost productivity) with a range of

18 clinical outcomes and used a cost-utility analysis to compare cost to the National Health Service

19 (NHS) with Quality-Adjusted Life-Years (QALYs).

20 The primary perspective for the economic evaluation was the health and social care provider, as that

21 is of greatest interest to UK policy makers.<sup>23</sup> However, the nature of the intervention suggests there

22 could be an impact on patients' costs, and as it is known that musculoskeletal conditions account for

23 a considerable amount of time off work<sup>10,11</sup> we included these perspectives in the analysis. We used

24 a cost-consequences approach to compare cost from all three perspectives (health care provider,

25 patients and carers, lost productivity) with a range of clinical outcomes and used a cost-utility

Formatted: Superscript, Not Highlight

Formatted: Superscript

Formatted: Superscript



~~analysis to compare cost to the National Health Service (NHS) with Quality Adjusted Life Years~~

~~(QALYs)~~

#### Setting and participants

We recruited adults aged 18 and over from four community physiotherapy services in England – Bristol, Somerset, Stoke-on-Trent, and Cheshire – which provided diversity in terms of socio-economic status and a mix of urban and rural communities. All patients referred by their general practitioner (GP), or who referred themselves, for physiotherapy for a non-urgent musculoskeletal problem were invited to take part. Patients were randomised to PhysioDirect or usual care on a two to one basis to increase the chances of the PhysioDirect service being fully utilised.

#### Interventions

The intervention has been reported in detail elsewhere<sup>154,252</sup>. Patients randomised to the PhysioDirect service received an invitation to telephone a senior (band 6 or above) specially trained physiotherapist, who assessed their musculoskeletal problem with the aid of previously developed computerised templates.<sup>232</sup> These templates were provided by Huntingdonshire Primary Care Trust, which has been operating a similar service since 2001. Patients were then sent appropriate advice leaflets about self-management and exercises to try at home, and invited to phone again and/or make a face-to-face appointment if necessary. If the service was engaged when the patient called the call was answered by a receptionist who added the patient to a 'call-back' list and the physiotherapist would return the call when they were free. Patients randomised to usual care were put on the usual service waiting list for face-to-face assessment and treatment.

#### Outcome measures

We used the EQ-5D-3L<sup>284</sup>, valued using the UK tariff,<sup>295</sup> to estimate QALYs gained for the cost-utility analysis. The primary outcome for the trial was the physical component summary (PCS) measure

**Formatted:** Font: 11 pt, Not Italic, Font color: Auto, Pattern: Clear

**Formatted:** Font: 11 pt, Not Italic, Font color: Auto, Pattern: Clear

**Formatted:** Font: 11 pt, Not Italic, Font color: Auto, Pattern: Clear

**Formatted:** Font: 11 pt, Not Italic, Font color: Auto, Pattern: Clear

1 from the SF-36v2 questionnaire<sup>2630</sup> and secondary clinical outcomes included: the Measure Yourself  
2 Medical Outcomes Profile (MYMOP);<sup>2731</sup> a Global Improvement Score – a single question about  
3 overall improvement; a composite measure of response to treatment including pain, function and  
4 overall improvement (OMERACT OARS);<sup>2832</sup> patient satisfaction; and waiting time to first treatment  
5 advice from a physiotherapist. All outcomes (except the global improvement score and waiting time  
6 to first treatment advice) were measured at baseline, 6 weeks and 6 months and were obtained  
7 from a self completed questionnaire administered at these three time points.

8

### 9 **Resource use**

10 The analysis was based on costs related to the reason for which the patient was referred to the  
11 physiotherapy service. We identified relevant resources in discussion with participating  
12 physiotherapists and service managers. Direct costs to the health care provider included: cost of  
13 initial and follow-up physiotherapy consultations; primary and community consultations; hospital  
14 care; and prescribed medication. Patient and carer costs included: telephone calls to the  
15 PhysioDirect service; travel; over the counter medication; prescription costs; private therapy and  
16 purchase of equipment; extra domestic help; and loss of earnings. Lost productivity was estimated  
17 separately in relation to time off work to attend physiotherapy appointments and time off because  
18 of the musculoskeletal condition itself.

19  
20 Patient level data about all physiotherapy appointments and consultations were recorded either  
21 automatically by computer or by the physiotherapist treating the patient. For those in the  
22 intervention group, the PhysioDirect assessment software recorded which physiotherapist  
23 conducted each telephone call, and the duration of each call. In addition to the time logged on to  
24 the system physiotherapists had to carry out administrative activities following each telephone call,  
25 such as collating information to send to the patient by post. The time spent on these activities was

1  
2  
3  
4  
5  
6  
7 1 estimated from information available at one site (Bristol) where manual recording of the entire  
8  
9 2 encounter supplemented the electronic recording.  
10  
11 3  
12 4 Physiotherapists assigned to the PhysioDirect service were required to be available throughout the  
13  
14 5 time the service was 'open' but they were not usually fully engaged in dealing with PhysioDirect  
15  
16 6 patients during these hours. We conducted an observational time and motion study at each of the  
17  
18 7 four sites to determine how they occupied their non-PhysioDirect contact time in order to apportion  
19  
20 8 costs appropriately. Time and motion data were collected at points in the study when the sites were  
21  
22 9 expected to be fully operational, and across a mix of day, time of day, and location. The capital costs  
23  
24 10 required to run a telephone services are potentially less than for a face-to-face service. Each site  
25  
26 11 provided information about space and equipment required to run their telephone service and we  
27  
28 12 used this to estimate an overall percentage reduction of capital costs for these compared with a  
29  
30 13 standard face-to-face service.  
31  
32 14  
33 15 Data about all face-to-face appointments were recorded routinely. These data included the length of  
34  
35 16 appointment, the grade of the physiotherapist seen, and information about missed appointments.  
36  
37 17  
38 18 Information about other NHS resource use was collected, where possible, from general practice  
39  
40 19 records and supplemented by information gained directly from patients. General practice notes  
41  
42 20 were scrutinised for patient level data on primary care consultations and prescribed medication. We  
43  
44 21 included all consultations at which the musculoskeletal condition for which the patient was referred  
45  
46 22 to physiotherapy was mentioned and these were recorded by type of consultation (for example,  
47  
48 23 face-to-face, telephone, out of hours, home visit) and by type of professional seen (for example, GP,  
49  
50 24 nurse). It was not feasible to distinguish between medication prescribed for the condition for which  
51  
52 25 the patient was referred for physiotherapy and any other musculoskeletal problem so we included  
53  
54 26 all medication of a potentially relevant type, defined using British National Formulary (BNF)<sup>2933</sup>

1 coding. These were: Analgesics (chapters 4.7.1 – 4.7.2); Non-steroidal anti-inflammatory drugs  
2 (10.1.1); Local corticosteroid injections (10.1.2.2); and Drugs for the relief of soft-tissue inflammation  
3 (10.3).

4  
5 A questionnaire was administered to participants at 6 weeks and 6 months after randomisation to  
6 obtain resource use data not available elsewhere. The questionnaire was designed specifically for  
7 this study but was similar in content and structure to others used for the same purpose<sup>34</sup> Questions  
8 ~~These~~ included information about hospital care related to the condition for which the patient was  
9 referred to physiotherapy: visits to Accident & Emergency, outpatient appointments, and inpatient  
10 stays. Information about personal expenditure relevant to the patient's musculoskeletal condition  
11 was also gained from the questionnaire at 6 weeks and 6 months. We asked about the cost of travel  
12 to physiotherapy and other health care appointments, expenditure on over the counter medication,  
13 prescription costs, use of private therapies and their cost, expenditure on equipment or devices, and  
14 extra help at home. In addition, participants were asked about any time off work, and the associated  
15 loss of earnings, because of their condition or to attend health care appointments relating to the  
16 condition including usual care physiotherapy and PhysioDirect.

#### 17 18 **Valuation of resource use**

19 Table 1 gives the unit costs and sources used to value the health care resources. We used Curtis<sup>3635</sup>  
20 to value primary and community health care and Department of Health reference costs<sup>364</sup> for all  
21 hospital-based care. The cost of prescribed medication was estimated from that published in the  
22 BNF,<sup>2933</sup> adjusted to allow for the discount available to the NHS, and the professional fee and  
23 container allowance in accordance with the Drug Tariff for England.<sup>372</sup> Personal expenditure was  
24 reported directly by the participants, the exception being travel by car, which was reported as  
25 mileage and costed using the AA schedule of motoring costs.<sup>383</sup> Time off work was valued using the  
26 median gross weekly earnings by age and sex.<sup>324</sup>

Formatted: Superscript

1  
2  
3  
4  
5  
6  
7 1  
8  
9 2  
10  
11 3  
12  
13 4  
14  
15 5  
16  
17 6  
18  
19 7  
20  
21 8  
22  
23 9  
24  
25 10  
26  
27 11  
28  
29 12  
30  
31 13  
32  
33 14  
34  
35 15  
36  
37 16  
38  
39 17  
40  
41 18  
42  
43 19  
44  
45 20  
46  
47 21  
48  
49 22  
50  
51  
52  
53  
54  
55  
56  
57  
58  
59  
60

*Table 1 here*

The cost of face-to-face physiotherapy consultations was estimated by adapting the methods of Curtis<sup>359</sup> to obtain a different unit cost for each band of staff at each site. National median pay rates, by band,<sup>3640</sup> were adjusted to allow for National Insurance, superannuation, and overheads, as per Curtis, then further adjusted to allow for band and site specific non-contact time. Information about the proportion of time physiotherapists on each grade typically spend in direct contact with patients was provided by the four physiotherapy service managers. This provided us with a cost per hour for each band of staff at each site.

The unit cost of physiotherapists working in the PhysioDirect service was estimated in a similar way, but allowing for the reduced cost of capital and overheads; information from the site managers indicated this to be about 50%. To obtain a cost per hour of telephone contact we used information from the computerised records of the PhysioDirect service, which identified the proportion of time spent by physiotherapists actually dealing with PhysioDirect patients. We then combined this with data from the time and motion study, which identified activities undertaken during non-contact time, for example, administration relating to face-to-face appointments or general administration, to give a cost per hour for each band of staff at each site.

All costs were valued in £ sterling at 2009 prices, adjusted for inflation where necessary.<sup>359</sup>

## 1 Data analysis

2 We investigated the amount of each resource used by patients in each group using frequencies,  
3 means and medians. Mean total cost per participant was derived by combining resource use with  
4 unit costs.

5  
6 QALYs were derived from responses to the EQ-5D-3L at baseline, 6 weeks and 6 months using  
7 valuations from the UK general population.<sup>295</sup> These values, representing health-related quality of  
8 life on a scale between zero (death) and 1 (best imaginable health), were used to compute QALYs  
9 experienced over the 6 month period using the area under the curve approach and adjusting for any  
10 difference between the groups at baseline.<sup>3743</sup>

11  
12 A cost-consequences matrix was constructed using all available data. We compared costs from all  
13 three perspectives (health care provider, patients and carers, lost productivity) with the SF-36v2 PCS,  
14 MYMOP, Global Improvement Score, OMERACT OARSI, patient satisfaction, waiting time, and QALYs.

15  
16 The cost-utility analysis was carried out using data on all patients for whom we had complete NHS  
17 cost and QALY data. An incremental cost-effectiveness ratio (ICER) was constructed, comparing the  
18 difference in mean total cost per patient with mean difference in QALYs, thus the lower the ICER, the  
19 greater the cost-effectiveness and the better the value for money. Uncertainty around the ICER was  
20 captured by using the bootstrapping technique: 5000 replicates of the cost and QALY data were  
21 created by sampling from the original data, with replacement. The range and spread of the 5000  
22 ICERs was used to replicating it 5000 times using the bootstrapping technique, construct a cost-  
23 effectiveness acceptability curve to indicate the likelihood of the intervention being cost-effective.  
24 The net monetary benefit (NMB) of the intervention was estimated from the point estimate of the  
25 ICER for values of societal willingness-to-pay of £20,000 and £30,000 per QALY. If the NMB is positive

1  
2  
3  
4  
5  
6  
7 1 at a given level of willingness to pay, the intervention is regarded as cost-effective. Confidence  
8 2 intervals around the NMB were formed from the bootstrapped estimates.  
9 3 ~~estimating a confidence interval around the net monetary benefit, and constructing a cost-~~  
10 4 ~~effectiveness-acceptability curve.~~  
11  
12  
13  
14  
15

16 6 We used the multiple imputation by chained equation procedure to address the issue of missing cost  
17 7 and EQ-5D data.<sup>3844</sup> This technique uses a regression model to estimate missing values from known  
18 8 values. In addition to cost and EQ-5D-3L variables the imputation model also included randomisation  
19 9 group, age, sex, and SF36v2 PCS. Stata v12<sup>3945</sup> was used to generate five datasets using 10 switching  
20 10 procedures.  
21  
22  
23  
24  
25  
26

27 12 Discounting was not carried out because the analysis was restricted to costs and outcomes over a  
28 13 period of less than a year. All analyses were conducted using Microsoft Excel and Stata v12.<sup>3944</sup>  
29  
30  
31  
32

### 33 15 **Sensitivity Analyses**

34 16 We addressed three areas of uncertainty using four one/two-way sensitivity analyses. First, we  
35 17 estimated the cost of running the PhysioDirect service if it was operating at full capacity. It is likely  
36 18 that this was not achieved during the trial because of: low demand due to exclusions and non-  
37 19 participation in the trial; inflexible staffing levels to ensure consistency throughout the trial period;  
38 20 and the 'one-way' system generally used, where physiotherapists waited for patients to call them  
39 21 but did not routinely contact patients themselves (notwithstanding some limited use of answer-  
40 22 machines). Data from the Bristol service, which continued to operate beyond the trial period and  
41 23 was then able to tailor staffing levels to demand, were used to estimate the cost of running a more  
42 24 'efficient but feasible' PhysioDirect service once the trial had ended.  
43  
44  
45  
46  
47  
48  
49  
50  
51  
52  
53  
54  
55  
56  
57  
58  
59  
60

1  
2  
3  
4  
5  
6  
7 1 The second area of uncertainty addressed hospital costs. Patients in the trial were recruited from  
8  
9 2 | primary care and for these, use of secondary care is infrequent but relatively expensive and this can  
10  
11 3 have a disproportionate effect on mean total cost. We tested this by excluding hospital costs from  
12  
13 4 the total.  
14  
15 5

16 6 | The third ~~area of uncertainty tested the effect of using imputed data rather than complete cases; the~~  
17  
18 7 ~~third and fourth~~ sensitivity analyses used ~~the trial imputed missing data with missing values~~  
19  
20 8 ~~imputed.~~  
21  
22 9

23  
24 10 ~~Finally, in a two-way sensitivity as described above first with data collected during the trial and~~  
25  
26 11 ~~analysis, we re-estimated second by combining with~~ results of the first ~~sensitivity analysis,~~  
27  
28 12 ~~(mimicking an 'efficient but feasible' service) in this instance using the imputed dataset. -~~  
29  
30  
31  
32

## 33 15 RESULTS

34  
35 16 | A total of 2,249 patients ~~were recruited between July 2009 and December 2009, and followed up~~  
36  
37 17 ~~until June 2010 took part in the trial,~~ 1506 allocated to PhysioDirect and 743 to usual care. The mean  
38  
39 18 age was 60, with slightly more females than males (60% vs 40%); they were overwhelmingly white  
40  
41 19 (97%), just over half (60%) were employed and all but a few were referred for physiotherapy by their  
42  
43 20 | GP. ~~Lower limb problems were the most prevalent (30%) reason for referral, 27% patients had a~~  
44  
45 21 ~~lumbar problem and 23% upper limb problems.~~ Nearly all participants (2,223=99%) gave permission  
46  
47 22 to access their GP notes to obtain data about primary care encounters and prescribed medication.  
48  
49 23 81% returned questionnaires at both 6 weeks and 6 months though not all participants completed  
50  
51 24 all sections at both time points. We had complete NHS cost and QALY data for 840 (56%)  
52  
53 25 PhysioDirect and 432 (58%) usual care participants.  
54  
55  
56  
57  
58  
59  
60



## 1 Resource use

2 Table 2 gives information about the different types of physiotherapy consultations by patients in  
3 each group. Of the 1506 patients in the PhysioDirect group, 39% (586) were managed solely over the  
4 telephone and only 46% (695) had any face-to-face consultations. In total, patients in the usual care  
5 group had, on average, 0.38 (95% CI: 0.12 to 0.63) more consultations than those in the PhysioDirect  
6 group and the mean total duration of all consultations was 20 minutes longer (95% CI: 12 to 28).

7  
8 *Table 2 here*

9  
10 Tables 3 and 4 give information about NHS and personal resource use. Just over a third of patients  
11 (35%) had a GP consultation during the 6 months and 40% received a prescription for  
12 musculoskeletal pain-related medication. There was very little difference between the two groups in  
13 terms of health care use and the only important-notable difference in personal expenditure was  
14 travel to physiotherapy appointments.

15  
16 *Tables 3 and 4 here*

## 17 Costs and consequences

18 Table 5 summarises the mean cost per patient, by group, for each category of cost. All available data  
19 are included giving variable denominators for each category. Comparing the two groups, there are  
20 small differences in cost in some categories but for most of these the confidence intervals indicate  
21 there is no evidence of a difference between the groups.

22  
23  
24 *Table 5 here*

1  
2  
3  
4  
5  
6  
7 Table 6 combines the results of the cost analysis with the full range of primary and secondary  
8  
9 outcomes, including QALYs.

10  
11  
12 *Table 6 here*

13  
14  
15  
16 Results are presented for all available data, with cost categories combined. ~~Again,~~ denominators  
17  
18 vary within the table and they also differ from those in table 5 because sub-categories have been  
19  
20 collapsed. There was no evidence of a difference in the primary clinical outcome (the SF36v2 PCS)  
21  
22 between the groups, suggesting that PhysioDirect led to similar outcomes as usual physiotherapy  
23  
24 care. Patients in the PhysioDirect group had their first assessment and telephone advice 27 days  
25  
26 earlier than those in the usual care group, however patient satisfaction was slightly lower in those  
27  
28 receiving PhysioDirect. QALYs were higher in the PhysioDirect group by 0.009, which equates to  
29  
30 about 3.3 extra days of full health over a year.

### 31 32 33 **Cost-utility analysis**

34  
35 The cost-utility analysis presented in Table 7 uses complete cases, that is, we include only those  
36  
37 patients for whom we had complete NHS cost and QALY data: 432 (58%) from the usual care group  
38  
39 and 840 (56%) from PhysioDirect. The small extra cost of caring for patients in the PhysioDirect  
40  
41 group was compensated for by the extra QALY gain, giving an incremental cost-effectiveness ratio of  
42  
43 £2,889. Values below £20,000 are regarded by NICE to indicate a cost-effective intervention<sup>27</sup>. At this  
44  
45 threshold level of if society is willingness to pay for a £20,000 per QALY<sup>23</sup> there is a positive -net  
46  
47 monetary benefit of is -£117 (95% CI -£96 to £310) and there is 0.88 probability that the intervention  
48  
49 is cost-effective. This is illustrated in the cost-effectiveness acceptability curve in figure 1.

50  
51  
52 *Table 7 here*

53  
54  
55 *Figure 1 here*

Formatted: Superscript

1  
2  
3  
4  
5  
6  
7  
8  
9  
10  
11  
12  
13  
14  
15  
16  
17  
18  
19  
20  
21  
22  
23  
24  
25  
26  
27  
28  
29  
30  
31  
32  
33  
34  
35  
36  
37  
38  
39  
40  
41  
42  
43  
44  
45  
46  
47  
48  
49  
50  
51  
52  
53  
54  
55  
56  
57  
58  
59  
601  
2  
3  
4  
5  
6  
7  
8  
9  
10  
11  
12  
13  
14  
15  
16  
17  
18  
19  
20  
21  
22  
23  
24  
25  
26  
27  
28  
29  
30  
31  
32  
33  
34  
35  
36  
37  
38  
39  
40  
41  
42  
43  
44  
45  
46  
47  
48  
49  
50  
51  
52  
53  
54  
55  
56  
57  
58  
59  
60

## Sensitivity Analysis

The results of the four sensitivity analyses are shown in table 8 and figure 2. Scenario (1) indicates the potential cost-effectiveness of a more efficient PhysioDirect service. During the trial PhysioDirect clinic opening hours, physiotherapists spent about 35% of their time on the phone or dealing with directly related administration; in Bristol after the trial, this was increased to 57%. Under this scenario, the cost per patient in the PhysioDirect group was £14.53 less than under trial conditions and £2.11 less per patient in the usual care group. The ICER is therefore lower, at £1,045, the NMB correspondingly higher at £127 ( $\lambda$ =£20,000). At low levels of  $\lambda$ , the probability of PhysioDirect being cost-effective under this scenario is higher than with the base case, though at  $\lambda$ =£20,000 it reaches a similar value (see figures 1 and 2).

*Table 8 here*

*Figure 2 here*

The effect of removing hospital costs from the analysis is shown in sensitivity analysis (2). Hospital costs accounted for 75% of all NHS costs yet only 19% (n=252) participants reported using any secondary care. Hospital use was evenly divided between the two groups so removing these from the analysis made very little difference to incremental analysis.

The effect of imputing missing NHS cost and QALY data is explored in sensitivity analysis (3). Using these data the cost of the interventions is lower but this is offset by higher NHS costs, giving a higher mean total cost in both groups, by £21.41 in the usual care group and £6.58 in the PhysioDirect group. QALYs using imputed data are lower, by 0.005 in the usual care group and by 0.010 in the PhysioDirect group. The net effect is a reduction of both incremental cost and incremental QALYs,

1 giving an ICER of £2,260. Uncertainty around the ICER is reduced, as seen by the flatter CEAC in  
2 figure 2.

3  
4 Sensitivity analysis (4) combines analyses (1) and (3) by using imputed cost data in the 'efficient  
5 service' scenario. In this case the results indicate that PhysioDirect is, on average, cheaper than usual  
6 care with a possible saving of £6.02 per patient, which gives a negative value for the ICER, indicating  
7 the intervention is superior in terms of both cost and outcome. ~~The results suggest a possible cost  
8 saving of £6.02 per patient; the~~ probability that the service is cost-effective at  $\lambda$ =£20,000 is 0.72.

## 11 DISCUSSION

### 12 Statement of principal findings

13 The results of this economic evaluation suggest that PhysioDirect services for patients with  
14 musculoskeletal problems require careful management if they are to be a cost-effective alternative  
15 to usual physiotherapy care. There was very little difference between the two groups in terms of  
16 either outcomes or costs, and the finding that PhysioDirect is cost-effective is based on evidence  
17 that it provides very slightly greater QALY benefits at very slightly greater cost.

18  
19 Clearer cost savings were observed in the sensitivity analysis that replicated the post-trial service,  
20 once greater flexibility in working arrangements was implemented. Without the restrictions of a trial  
21 environment staffing was adjusted to meet the anticipated demand, a call-back service was  
22 employed which accommodated fluctuations in activity during each session, referrals added to the  
23 system were adjusted regularly to reflect actual staffing and the number of patients waiting for  
24 a call-back and a higher throughput of patients led to greater economies of scale. These changes  
25 ensured physiotherapists within the PhysioDirect service spent a higher proportion of their  
26 PhysioDirect clinic time on the telephone with patients. There was no evidence of a difference

1 between PhysioDirect and usual care in cost to patients and their families, or to society through the  
2 costs of lost production.

#### 3 4 **Strengths and weaknesses of the study**

5 The study has a number of strengths. It is the first study assessing the cost-effectiveness of a  
6 PhysioDirect service including a large sample of patients with a wide range of musculoskeletal  
7 problems based across a number of locations.<sup>154</sup> It uses a rigorous study design and conforms to  
8 CONSORT guidelines.<sup>469</sup> The follow up rate from participating patients was in line with other  
9 primary care trials<sup>47,48</sup> a high proportion of the resource use data were collected from GP  
10 records, and there was collection of resource use information outside of the main health service  
11 perspective. ~~Nevertheless, there are also limitations.~~ The cost consequences analysis provides  
12 complete information on costs from different perspectives compared with a range of outcomes so  
13 although this approach is sometimes criticised for leaving the reader to evaluate the findings it does  
14 have the advantage of transparency. Furthermore, in this study we have also presented a cost-utility  
15 analysis that conforms to the recommendations of NICE. The proportion of eligible individuals  
16 consenting to participate in the trial was only 50%.<sup>22</sup> ~~Nevertheless, there are also limitations.~~ The  
17 practices recruited to the trial had a low proportion of ethnic minority patients, a slightly lower  
18 proportion of patients from deprived areas were judged to be eligible, and the proportion of eligible  
19 individuals consenting to participate in the trial was only 50%.<sup>23</sup> These factors limit the  
20 generalisability of the results though none of these selection effects was large. Further, a particular  
21 difficulty in conducting economic evaluation with new service developments is ensuring that they  
22 are fully utilised,<sup>44,24</sup> particularly when conducting analysis from a long-run perspective, as here.  
23 Although there was a clear run-in period prior to data collection for the trial (ranging from 4 to 12  
24 weeks in each of the four sites), to ensure that services were operating as well as they could, and a  
25 2:1 randomisation ratio in favour of PhysioDirect was used, there was still considerable  
26 underutilisation of the new service. This was ameliorated by including a more fully utilised service

Formatted: Superscript

Formatted: Check spelling and grammar, Not Superscript/ Subscript

1 within the sensitivity analysis. It should also be noted that, because of the use of a long-run  
2 perspective in the analysis, set up costs, which may, in the short-term be important in a financially  
3 constrained service, are not included here. Finally, because the differences in both costs and effects  
4 are small, there is still some uncertainty around the findings.

### 6 **The meaning of the study and implications for policy makers**

7 If the aim of health services is to achieve maximum health gain from an investment in health care,  
8 then PhysioDirect has a high probability of being more cost-effective than usual physiotherapy care.

9 This research also, however, suggests that it cannot be assumed that PhysioDirect will reduce costs,  
10 although it could potentially do so if PhysioDirect services are managed efficiently. Both the costs  
11 and cost-effectiveness of services will depend on the productivity of physiotherapist time. If  
12 physiotherapists are able to use most of their time dealing directly with patients during sessions  
13 when they are available on the telephone, then the service will be less costly. This is most likely to be  
14 achieved by operating a call-back service and/or by operating the service on a large scale to even out  
15 fluctuations in demand. Operating a system on larger scale might also offer other economies of  
16 scale, particularly in terms of infrastructure. Further efficiencies may also be achieved if these  
17 services are, in the future, provided in conjunction with direct access for patients (rather than  
18 following referral from another health care professional), given that patients who self-refer are likely  
19 to contact the service with musculoskeletal problems of shorter duration,<sup>492</sup> and such patients may  
20 be particularly appropriate for the initial assessment and advice provided by a PhysioDirect service.

21 More generally, the study has broader implications for telephone services, particularly around the  
22 implicit assumption that such services will inevitably be money saving. Here this assumption was  
23 found to be false, largely because the physiotherapists' time was underutilised during PhysioDirect  
24 clinic hours. Thus, for all such services, it will be important for policy makers to ensure that easy  
25 assumptions about the costs of these services are properly assessed in relation to factors such as

1  
2  
3  
4  
5  
6  
7 1 how efficiently the service is run, and what proportion of patients are subsequently invited for face  
8 2 to face care following an initial telephone call.  
9

10 3

#### 12 4 **Unanswered questions and future research**

14 5 As services evolve, further research should explore the costs and benefits of PhysioDirect under  
15 6 different scenarios. These might include: comparing different skill levels of staff operating the  
16 7 service; the inclusion of patient self-referrals in addition to GP referrals; the use, or otherwise, of  
17 8 computerised support in assessing the patient; the extension to internet services (possibly combined  
18 9 with cameras);<sup>4450</sup> and the use of mobile 'smartphone' technology, for example in rapid assessment  
19 10 of musculoskeletal injuries. In particular, however, it will be important to assess the costs and  
20 11 benefits of services once they are more established and provided on a wider scale. The costs and  
21 12 benefits of telehealth more generally need further exploration in relation to their cost effectiveness  
22 13 particularly given the negative findings of the Whole Systems Demonstrator project evaluating  
23 14 telehealth support and treatment for patients with long term conditions.<sup>4451</sup> It would be helpful to  
24 15 identify those characteristics that are likely to make services both more cost-effective and less  
25 16 costly.  
26  
27  
28  
29  
30  
31  
32  
33  
34  
35  
36  
37  
38  
39  
40  
41  
42  
43  
44  
45  
46  
47  
48  
49  
50  
51  
52  
53  
54  
55  
56  
57  
58  
59  
60

## References

1. Munro J, Nicholl J, O'Cathain A et al. Impact of NHS Direct on demand for immediate care: observational study. *Br Med J* 2000;321:150-153.
2. Lattimer V, Sassi F, George S et al. Cost analysis of nurse telephone consultation in out of hours primary care: evidence from a randomised controlled trial. *Br Med J* 2000;320:1053-1057.
3. Lattimer V, George S, Thompson F et al. Safety and effectiveness of nurse telephone consultation in out of hours primary care: randomised controlled trial. The South Wiltshire Out of Hours Project (SWOOP) Group. *Br Med J* 1998;317:1054-1059.
4. Pinnock H, Bawden R, Proctor S et al. Accessibility, acceptability, and effectiveness in primary care of routine telephone review of asthma: pragmatic, randomised controlled trial. *Br Med J* 2003;326:477-479.
5. Bunn F, Byrne G, Kendall S. Telephone consultation and triage: effects on health care use and patient satisfaction. *Cochrane Database of Systematic Reviews*.(4):CD004180, 2004. 2004;CD004180.
6. McKinstry B, Watson P, Pinnock H et al. Telephone consulting in primary care: a triangulated qualitative study of patients and providers. *Br J Gen Pract* 2009;59:e209-e218.
7. Picavet HS, Schouten JS. Musculoskeletal pain in the Netherlands: prevalences, consequences and risk groups, the DMC(3)-study. *Pain* 2003;102:167-178.
8. Jordan K, Ong BN, Croft P. Previous consultation and self reported health status as predictors of future demand for primary care. *J Epidemiol Commun Health* 2003;57:109-113.
9. McKormick A, Fleming D, and Charlton J *Morbidity statistics from general practice. Fourth national study 1991-1992 Serise MB5 no.3*. London: 1995.



1  
2  
3  
4  
5  
6  
7 10. [Balage F, Mannion A, Pellise F, et al. Non-specific low back pain. \*Lancet\* 2012;379\(9814\):482-91.](#)

Formatted: Font: Italic

8  
9 [Andersson GB. Epidemiological features of chronic low back pain. \*Lancet\* 1999; 354: 581-585.](#)

10  
11  
12 11. [Chuang L-H, Soares M, Tilbrook H, et al. A Pragmatic multicentred randomized controlled trial of  
13  
14 \*yoga for chronic low back pain: economic evaluation, \*Spine\* 2012;37\(18\):1593-1601.\*](#)

Formatted: Font: Italic

15  
16  
17 [Maniadakis N, Gray A. The economic burden of back pain in the UK. \*Pain\* 2000;84:95-103.](#)

18  
19  
20 12. National Institute for Health and Clinical Excellence *Low back pain: early management of  
21  
22 persistent non-specific low back pain. NICE clinical guideline 88. 2009.*

Formatted: Indent: Hanging: 0.25"

23  
24  
25  
26  
27 13. Department of Health. Physiotherapy Services Summary Information for 2004-2005, England

Formatted: Indent: Hanging: 0.25"

28  
29 [https://catalogue.ic.nhs.uk/publications/hospital/outpatients/nhs-phys-serv-summ-eng-2004-  
30  
31 05/nhs-phys-serv-summ-eng-2004-05-rep.pdf](https://catalogue.ic.nhs.uk/publications/hospital/outpatients/nhs-phys-serv-summ-eng-2004-05/nhs-phys-serv-summ-eng-2004-05-rep.pdf)  
32 [http://www.hscic.gov.uk/searchcatalogue?productid=4306&kwd=K&gran=Government+Office+  
33  
34 Regions&sort=Relevance&size=10&page=1#top](http://www.hscic.gov.uk/searchcatalogue?productid=4306&kwd=K&gran=Government+Office+Regions&sort=Relevance&size=10&page=1#top) (accessed 16.08.2013)

Formatted: Default Paragraph Font

35  
36  
37 14. [Maniadakis N, Gray A. The economic burden of back pain in the UK. \*Pain\* 2000;84:95-103.](#)

38  
39  
40  
41  
42 154. Salisbury C, Montgomery AA, Hollinghurst S et al. Effectiveness of PhysioDirect telephone  
43  
44 assessment and advice services for patients with musculoskeletal problems: pragmatic  
45  
46 randomised controlled trial. *Br Med J* 2013;346:f43.

47  
48  
49 165. Hodgson K. Kidderminster helpline proves a success. *Physiotherapy Frontline* 2001;7:22-23.

50  
51  
52 176. Taylor S, Ellis I, and Gallagher M. Patient satisfaction with a new physiotherapy telephone  
53  
54 service for back pain patients. *Physiotherapy* 2002;88:645-657.

- 1  
2  
3  
4  
5  
6  
7 | ~~187.~~ Clayson M and Woolvine M. Back pain direct clinic: a collaboration between general  
8 practitioners and physiotherapists. *Work Based Learning in Primary Care* 2004;2:38-43.  
9  
10  
11 | ~~198.~~ Turner D. An exploratory study of physiotherapy telephone assessment. *International*  
12 *Journal of Therapy and Rehabilitation* 2009;16:97-105.  
13  
14  
15  
16 | ~~2049.~~ Russell T, Truter P, Blumke R, Richardson B. The diagnostic accuracy of telerehabilitation for  
17 nonarticular lower-limb musculoskeletal disorders. *Telemed J & E-Health* 2010;16:585-594.  
18  
19  
20 | ~~210.~~ Patel S, Hossain FS, Colaco HB et al. The accuracy of primary care teams in diagnosing  
21 disorders of the shoulder. *J Eval Clin Pract* 2011;17:118-122.  
22  
23  
24  
25 | ~~224.~~ Jette DU, Ardleigh K, Chandler K et al. Decision-making ability of physical therapists: physical  
26 therapy intervention or medical referral. *Phys Ther* 2006;86:1619-1629.  
27  
28  
29  
30 | ~~232.~~ Salisbury C, Foster NE, Hopper C et al. A pragmatic randomised controlled trial of the  
31 effectiveness and cost-effectiveness of 'PhysioDirect' telephone assessment and advice services  
32 for physiotherapy. *Health Technology Assessment (Winchester, England)* /20;17:1-157.  
33  
34  
35  
36 ~~23.~~ National Institute for Health and Clinical Excellence. Guide to the Methods of Technology  
37 Appraisal <http://www.nice.org.uk/media/B52/A7/TAMethodsGuideUpdatedJune2008.pdf>  
38 (~~accessed 10.06.2013~~)  
39  
40  
41  
42 ~~2441.~~ Coast J, Hensher M, Mulligan J, et al. Conceptual and practical difficulties with the economic  
43 evaluation of health services developments. *J Health Serv Res Policy* 2000;5:42-48.  
44  
45  
46  
47 ~~25.~~ Coast, J. Is economic evaluation in touch with society's health values? *Br Med J* 2004;(329):1233-  
48 1236.  
49  
50  
51  
52  
53  
54  
55  
56  
57  
58  
59  
60

Formatted: Font: Italic, No underline, Font color: Auto

26. Drummond M, Brown R, Fendrick M, et al. Use of Pharmacoeconomics Information—Report of

[the ISPOR Task Force on Use of Pharmacoeconomic/Health Economic Information in Health-Care](#)

[Decision Making. \*Value in Health\* 2003;6 \(4\):407-416.](#)

Formatted: Indent: Left: 0"

Formatted: Font: Italic, No underline, Font color: Auto

27. National Institute for Health and Clinical Excellence. Guide to the Methods of Technology

Appraisal <http://www.nice.org.uk/media/B52/A7/TAMethodsGuideUpdatedJune2008.pdf>

(accessed 16.08.2013)

Formatted: Indent: Left: 0", Hanging: 0.25"

284. Brooks R, with the EuroQol Group. EuroQol: the current state of play. *Health Policy* 1996;53:

72.

Formatted: Indent: Left: 0", Hanging: 0.25"

295. Dolan P, Gudex C, Kind P et al. *A social tariff for EuroQol: Results from a UK general*

*population survey.* University of York, 1-9-1995.

3026. Quality Metric. A community for measuring health outcomes using SF tools. [http://www.sf-](http://www.sf-36.org/)

[36.org/](http://www.sf-36.org/) (accessed 16.08.2013)

3127. Paterson, C. Measuring outcomes in primary care: a patient generated measure, MYMOP,

compared with the SF-36 survey. *Br Med J* 1996;312:1016-1020.

3228. Pham T, Van Der Heijde D, Lasserre M et al. Outcome variables for osteoarthritis clinical

trials: The OMERACT-OARSI set of responder criteria. *J Rheumatol* 2003;30:1648-1654.

3329. British National Formulary. British National Formulary. <http://www.bnf.org/bnf> (accessed

16.08.2013)

Formatted: Default Paragraph Font, Font: (Default) Calibri, 11 pt, No underline, Font color: Auto, Do not check spelling or grammar, Pattern: Clear

34. [Database of Instruments for Resource Use Measurement \(DIRUM\)](#) <http://www.dirum.org>

(accessed 16.08.2013)

Formatted: Default Paragraph Font, Font: (Default) Calibri, 11 pt, No underline, Font color: Auto, Do not check spelling or grammar, Pattern: Clear

350. Curtis L. *Unit costs of health and social care 2009.* PSSRU, University of Kent, 2010.

Formatted: Default Paragraph Font, Font: (Default) +Body (Calibri), Check spelling and grammar

- 1  
2  
3  
4  
5  
6  
7 364. Department of Health. NHS Reference costs 2009-2010.  
8  
9 <https://www.gov.uk/government/publications/nhs-reference-costs-2009-2010> (accessed  
10 160.086.2013)  
11  
12  
13 372. National Health Service. NHS Drug tariff.  
14  
15 <http://www.nhsbsa.nhs.uk/PrescriptionServices/924.aspx> (accessed 160.086.2013)  
16  
17  
18 383. The Automobile Association. The AA schedule of motoring costs.  
19  
20 [http://www.theaa.com/motoring\\_advice/running\\_costs/index.html](http://www.theaa.com/motoring_advice/running_costs/index.html) (accessed 160.086.2013)  
21  
22  
23 394. Office for National Statistics. Annual survey of hours and earnings 2009  
24  
25 [http://www.ons.gov.uk/ons/rel/ashe/annual-survey-of-hours-and-earnings/2009-](http://www.ons.gov.uk/ons/rel/ashe/annual-survey-of-hours-and-earnings/2009-revised/index.html)  
26 revised/index.html (accessed 160.086.2013)  
27  
28  
29 4035. Royal College of Nursing. Agenda for change – pay rates  
30  
31 [http://www.nhscareers.nhs.uk/working-in-the-nhs/pay-and-benefits/agenda-for-change-pay-](http://www.nhscareers.nhs.uk/working-in-the-nhs/pay-and-benefits/agenda-for-change-pay-rates)  
32 rates (accessed 160.086.2013)  
33  
34  
35 4136. Scott A, Simoens S, Heaney D, et al. What does GP out of hours care cost? An analysis of  
36 different models of out of hours care in Scotland. *Scot Med J* 2004;49:61-66.  
37  
38  
39 42. O'Dowd A. Cost of out of hours care was 22% higher than predicted in England. *Br Med J*  
40 [2006;332:1113.4.](https://doi.org/10.1136/bmj.2006.332.1113.4)  
41  
42  
43  
44 4337. Manca A, Hawkins N, Sculpher M. Estimating mean QALYs in trial-based cost-effectiveness  
45 analysis: the importance of controlling for baseline utility. *Health Econ* 2005;14:487-496.  
46  
47  
48  
49 4438. van Buuren S, Boshuizen HC, Knook D L. Multiple Imputation of missing blood pressure  
50 covariates in survival analysis. *Stat Med* 1999;18:681-694:  
51  
52  
53  
54 4539. StataCorp *Statistical Software: Release 11*. College Station, TX: StataCorp LP. 2009.  
55  
56  
57  
58  
59  
60

Formatted: Font: Italic, No underline, Font color: Auto

469. The CONSORT Group. CONSORT: the transparent reporting of trials <http://www.consort-statement.org> (accessed 16.08.2013)

~~47. Stamuli E, Bloor K, MacPherson H, et al. Cost-effectiveness of acupuncture for irritable bowel syndrome: findings from an economic evaluation conducted alongside a pragmatic randomised controlled trial in primary care. *BMC Gastroenterology* 2012; 12:149.~~

~~48. Hill JC, Whitehurst DG, Lewis M, et al. Comparison of stratified primary care management for low back pain with current best practice (STarT Back): a randomised controlled trial. *Lancet* 2011; 378 (9802): 1560-71.~~

~~41. Coast J, Hensher M, Mulligan J, et al. Conceptual and practical difficulties with the economic evaluation of health services developments. *J Health Serv Res Policy* 2000;5:42-48.~~

492. Leemrijse CJ, Swinkels IC, Veenhof C. Direct access to physical therapy in the Netherlands: results from the first year in community-based physical therapy. *Phys Ther*. 2008; 88(8):936-46

5043. Li LC, Townsend AF, Badley EM. Self-management interventions in the digital age: new approaches to support people with rheumatologic conditions. *Best Pract Res Clin Rheumatol*. 2012; 26(3):321-33.

5144. Henderson C, Knapp M, Fernandez J-L, et al. Cost effectiveness of telehealth for patients with long term conditions (Whole Systems Demonstrator telehealth questionnaire study): nested economic evaluation in a pragmatic, cluster randomised controlled trial. *Br Med J* 2013;34.

~~i2065.~~

**Formatted:** Font: (Default) Calibri, No underline, Font color: Auto, Do not check spelling or grammar

**Formatted:** Font: (Default) Calibri, 11 pt, No underline, Font color: Auto, Do not check spelling or grammar

**Formatted:** Normal, Indent: Left: 0", Hanging: 0.25", Space After: 12 pt, Line spacing: Double, Tab stops: 0.25", Left

**Formatted:** Font: (Default) Calibri, 11 pt, Not Bold, No underline, Font color: Auto, Do not check spelling or grammar

**Formatted:** Font: (Default) Calibri, 11 pt, No underline, Font color: Auto, Do not check spelling or grammar

**Formatted:** Font: (Default) Calibri, No underline, Font color: Auto, Do not check spelling or grammar

**Formatted:** Font: (Default) Calibri, 11 pt, Not Italic, No underline, Font color: Auto, Do not check spelling or grammar

**Formatted:** Font: (Default) Calibri, 11 pt, Not Italic, No underline, Font color: Auto, Do not check spelling or grammar

**Formatted:** Font: (Default) Calibri, Do not check spelling or grammar

**Formatted:** Font: (Default) Calibri, No underline, Font color: Auto, Do not check spelling or grammar

**Formatted:** Indent: Left: 0", Hanging: 0.25"

**Formatted:** Font: (Default) Calibri, 11 pt, Not Bold, No underline, Font color: Auto, Do not check spelling or grammar

**Formatted:** Font: (Default) Calibri, 11 pt, No underline, Font color: Auto, Do not check spelling or grammar

**Formatted:** Font: (Default) Calibri, 11 pt, No underline, Font color: Auto, Do not check spelling or grammar

**Formatted:** Font: (Default) Calibri, No underline, Font color: Auto, Do not check spelling or grammar

**Formatted** ... [1]

**Formatted** ... [2]

**Formatted** ... [3]

**Formatted** ... [4]

**Formatted:** Indent: Left: 0", Hanging: 0.25"

**Formatted** ... [5]

**Formatted:** Font: Italic, No underline, Font color: Auto

**Formatted:** Font: Italic, No underline, Font color: Auto

**Formatted:** Indent: Hanging: 0.25"

**Formatted:** Font: Italic, No underline, Font color: Auto

**Formatted** ... [6]

1  
2  
3  
4  
5  
6  
7 **Competing interestes**

8 2 We have read and understood the BMJ Group policy on declaration of interests and declare the  
9 3 following interests: none.  
10 4

11 5  
12 6  
13 7 **Funding**

14 8 The research was funded by the Medical Research Council (MRC) and managed by the National  
15 9 Institute for Health Research (NIHR) on behalf of the MRC-NIHR partnership. The funder had no role  
16 10 in: the study design; the collection, analysis, or interpretation of data; the writing of the report; the  
17 11 decision to submit the paper for publication. The researchers are all independent of the funders. All  
18 12 researchers had access to all the data.

19 13 Nadine Foster is supported by a National Institute for Health Research NIHR Research Professorship  
20 14 NIHR-RP-011-015. The views expressed in this publication are those of the authors and not  
21 15 necessarily those of the NHS, the National Institute for Health Research or the Department of  
22 16 Health.  
23 17  
24 18

25 19 **Aurthors' contributions**

26 20 CS was principal investigator on the trial, SH took the lead on the economic evaluation. JC, NF, SG,  
27 21 JH, and AM were co-applicants and contributed to the conception and design. SH, JC and JB carried  
28 22 out the analysis with help from CS and AM, and all authors contributed to the interpretation of the  
29 23 data. SH and JC wrote the first draft of the paper with all authors contributing to subsequent  
30 24 revisions. All authors have seen and approved the final version.  
31 25  
32 26

33 27 **Acknowledgments**

34 28 [We would like to dedicate this paper to the memory of Cherida Hopper, trial manager of the](#)  
35 29 [PhysioDirect study, who sadly died in June 2013.](#)  
36 30

37 31 We would like to thank the patients who contributed to this research; the physiotherapists,  
38 32 administrative staff, managers and commissioners who supported the set up and delivery of the trial  
39 33 in the four primary care trusts; participating general practices; the research support staff in Bristol  
40 34 and Keele; members of the Trial Steering Committee and Data Monitoring Committee; and Jill  
41  
42  
43  
44  
45  
46  
47  
48  
49  
50  
51  
52  
53  
54  
55  
56  
57  
58  
59  
60

1  
2  
3  
4  
5  
6  
7  
8  
9  
10  
11  
12  
13  
14  
15  
16  
17  
18  
19  
20  
21  
22  
23  
24  
25  
26  
27  
28  
29  
30  
31  
32  
33  
34  
35  
36  
37  
38  
39  
40  
41  
42  
43  
44  
45  
46  
47  
48  
49  
50  
51  
52  
53  
54  
55  
56  
57  
58  
59  
60

1 Gamlin and Nick Deane who developed the PhysioDirect assessment algorithms and software used  
2 in this trial.

For peer review only

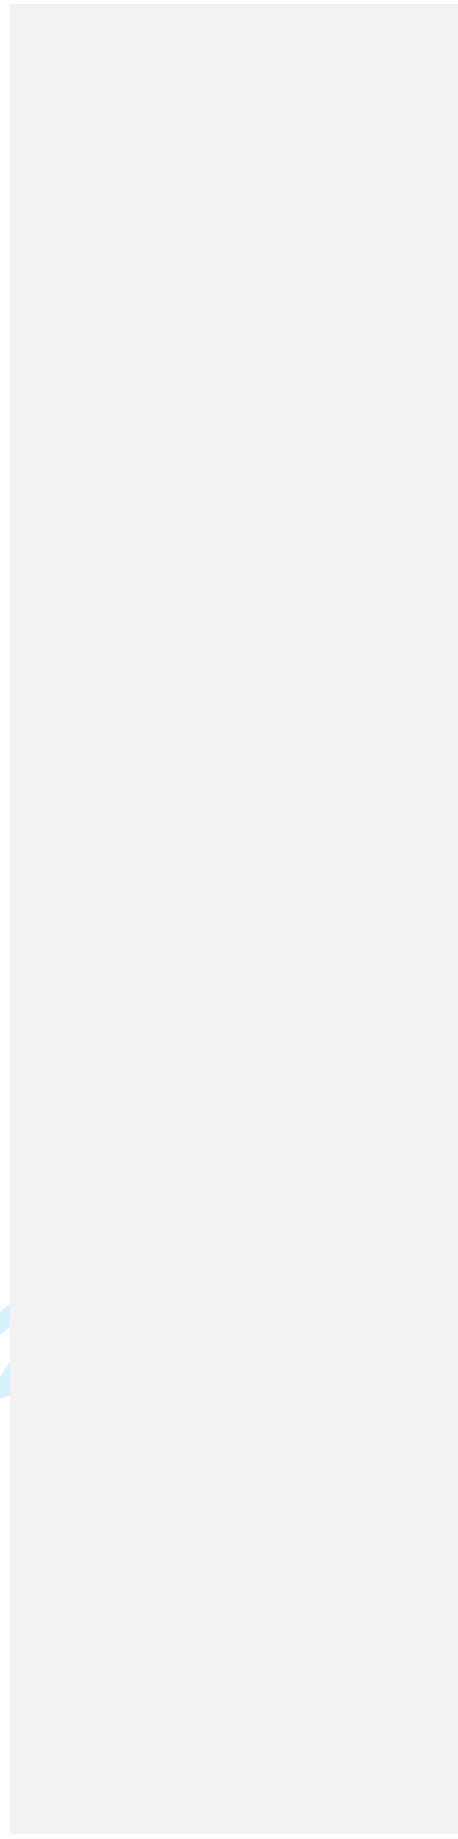

Table 1: Data sources and unit costs

|                                                 | Unit cost (£)                                                          |
|-------------------------------------------------|------------------------------------------------------------------------|
| <b>Primary and Community Care<sup>350</sup></b> |                                                                        |
| General Practitioner                            |                                                                        |
| Surgery                                         | 27.00                                                                  |
| Telephone consultation                          | 16.00                                                                  |
| Home visit                                      | 91.00                                                                  |
| Practice nurse                                  |                                                                        |
| Surgery                                         | 10.00                                                                  |
| Telephone consultation                          | 5.93                                                                   |
| Health Care Assistant/phlebotomist              |                                                                        |
| Surgery                                         | 6.92                                                                   |
| District Nurse                                  |                                                                        |
| Home visit                                      | 16.33                                                                  |
| <b>Out of Hours<sup>41,42</sup></b>             |                                                                        |
| General practitioner                            | 23.50                                                                  |
| <b>Hospital care<sup>363</sup></b>              |                                                                        |
| A&E                                             | 103.00                                                                 |
| Outpatient visits                               | By Healthcare Resource Group,<br>differentiated by first and follow-up |
| Inpatient stays                                 | By Healthcare Resource Group                                           |
| <b>Prescribed medication<sup>2933</sup></b>     | per item, by name, strength and amount                                 |
| <b>Mileage<sup>383</sup></b>                    | 0.4612                                                                 |
| <b>Time off work<sup>394</sup></b>              | Median national wage by age and sex                                    |



Table 2: Number of physiotherapy consultations and mean duration, by type and group

|                                   |                    | Usual care (n=743) | PhysioDirect (n=1506) |
|-----------------------------------|--------------------|--------------------|-----------------------|
| <b>Face-to-face appointments</b>  | mean (SD) number   | 3.11(2.63)         | 1.91(2.72)            |
|                                   | mean (SD) total    | 107.51(88.92)      | 64.20(89.31)          |
|                                   | duration (minutes) |                    |                       |
| <b>Telephone appointments</b>     | mean (SD) number   | 0.13(0.44)         | 0.96 (0.63)           |
|                                   | mean (SD) total    | 4.21(14.64)        | 27.37(19.92)          |
|                                   | duration (minutes) |                    |                       |
| <b>Home visits</b>                | mean (SD) number   | 0.00 (0.06)        | 0.00 (0.06)           |
|                                   | mean (SD) total    | 0.14(2.27)         | 0.12(2.12)            |
|                                   | duration (minutes) |                    |                       |
| <b>All physiotherapy contacts</b> | mean (SD) number   | 3.25(2.70)         | 2.87(2.94)            |
|                                   | mean (SD) total    | 111.86(90.50)      | 91.70 (95.40)         |
|                                   | duration (minutes) |                    |                       |

**Table 3: Health services resource use, by group. All available data.**

|                                                 | Mean (SD) number of consultations |                   |             |                    |
|-------------------------------------------------|-----------------------------------|-------------------|-------------|--------------------|
|                                                 | n                                 | usual care        | n           | PhysioDirect       |
| GP consultations                                | 739                               | 0.77(1.47)        | 1484        | 0.87 (1.68)        |
| Nurse consultations                             | 739                               | 0.04 (0.22)       | 1484        | 0.06 (0.32)        |
| Other primary care consultations                | 739                               | 0.02(0.14)        | 1484        | 0.02 (0.17)        |
| <b>Total number of primary care contacts</b>    | <b>739</b>                        | <b>0.83(1.56)</b> | <b>1484</b> | <b>0.96 (1.84)</b> |
| Number of prescriptions                         | 728                               | 1.36 (2.73)       | 1469        | 1.68 (3.72)        |
| A&E (visits)                                    | 467                               | 0.02 (0.01)       | 912         | 0.03 (0.01)        |
| Out-patient (consultations)                     | 467                               | 0.17 (0.83)       | 910         | 0.35 (1.03)        |
| In-patient stays (Finished Consultant Episodes) | 465                               | 0.01 (0.10)       | 910         | 0.01 (0.10)        |

**Table 4: Patient and societal resource use, by group. All available data.**

| Number (%) reporting:                             | n   | usual care | n    | PhysioDirect |
|---------------------------------------------------|-----|------------|------|--------------|
| Expenditure on travel to physiotherapy            | 462 | 242 (52.4) | 1232 | 308 (25.8)   |
| Expenditure on travel to primary care             | 669 | 116 (17.3) | 1337 | 237 (17.7)   |
| Expenditure on over-the-counter medication        | 506 | 256 (50.6) | 1028 | 512 (49.8)   |
| Expenditure on prescriptions                      | 559 | 264 (47.2) | 1085 | 508 (46.8)   |
| Expenditure on private therapy                    | 484 | 89 (18.4)  | 934  | 167 (17.9)   |
| Equipment purchase                                | 480 | 139 (29.0) | 939  | 233 (24.8)   |
| Payments for extra domestic help                  | 459 | 35 (7.6)   | 928  | 76 (8.2)     |
| Loss of earnings                                  | 598 | 30 (5.5)   | 1209 | 64 (5.3)     |
| Any time off to attend physiotherapy consultation | 692 | 218 (31.5) | 1416 | 380 (26.8)   |
| Work has been affected because of condition       | 477 | 141 (29.6) | 959  | 317 (33.1)   |

Table 5: Mean total cost per patient, by group and category. All available data<sup>a</sup>.

|                                            | usual care     |                         | PhysioDirect   |                         | Incremental difference<br>(95% Confidence Interval) |
|--------------------------------------------|----------------|-------------------------|----------------|-------------------------|-----------------------------------------------------|
|                                            | mean (SD) cost |                         | mean (SD) cost |                         |                                                     |
|                                            | n              | mean (SD) cost          | n              | mean (SD) cost          |                                                     |
| <b>Physiotherapy services</b>              |                |                         |                |                         |                                                     |
| Face-to-face appointments                  | 743            | £64.42 (£53.00)         | 1506           | £38.76 (£53.92)         | -£25.66 (-£30.37 to -£20.95)                        |
| Telephone appointments                     | 743            | £5.22 (£18.01)          | 1506           | £35.17 (£26.34)         | £29.94 (£27.84 to £32.05)                           |
| Home visits                                | 743            | £0.08 (£1.33)           | 1506           | £0.08 (£1.46)           | £0.00 (-£0.12 to £0.13)                             |
| <b>Total physiotherapy cost</b>            | <b>743</b>     | <b>£69.73 (£56.17)</b>  | <b>1506</b>    | <b>£74.01 (£63.97)</b>  | <b>£4.28 (-£1.12 to £9.69)</b>                      |
| <b>Primary care services</b>               |                |                         |                |                         |                                                     |
| GP consultations                           | 739            | £19.21 (£35.91)         | 1484           | £21.69 (£41.66)         | £2.48 (-£1.04 to £6.00)                             |
| Nurse consultations                        | 739            | £0.44 (£2.37)           | 1484           | £0.61 (£3.17)           | £0.16 (-£0.10 to £0.42)                             |
| Other primary care consultations           | 739            | £0.03 (£0.57)           | 1484           | £0.07 (£1.31)           | £0.05 (-£0.05 to £0.15)                             |
| <b>Total primary care cost</b>             | <b>739</b>     | <b>£19.68 (£36.68)</b>  | <b>1484</b>    | <b>£22.37 (£42.83)</b>  | <b>£2.69 (-£0.92 to £6.30)</b>                      |
| <b>Medication cost</b>                     | <b>728</b>     | <b>£11.04 (£51.61)</b>  | <b>1469</b>    | <b>£10.33 (£55.43)</b>  | <b>-£0.72 (-£5.53 to £4.10)</b>                     |
| <b>Hospital services</b>                   |                |                         |                |                         |                                                     |
| A&E                                        | 467            | £1.99 (£17.12)          | 912            | £3.17 (£20.84)          | £1.18 (-£1.01 to £3.37)                             |
| Out-patient                                | 467            | £30.74 (£98.36)         | 910            | £38.35 (£126.05)        | £7.61 (-£5.50 to £20.72)                            |
| In-patient                                 | 465            | £51.02 (£520.48)        | 910            | £34.99 (£399.62)        | -£16.03 (-£65.70 to £33.64)                         |
| <b>Total hospital cost</b>                 | <b>459</b>     | <b>£83.04 (£561.68)</b> | <b>899</b>     | <b>£77.00 (£446.24)</b> | <b>-£6.04 (-£60.99 to £48.91)</b>                   |
| <b>Personal expenditure</b>                |                |                         |                |                         |                                                     |
| Cost of all calls to physiotherapy service | 743            | £0.97 (£0.99)           | 1506           | £1.75 (£1.29)           | £0.79 (£0.68 to £0.89)                              |
| Travel to physiotherapy                    | 462            | £6.11 (£11.48)          | 1232           | £3.11 (£8.51)           | -£3.01 (-£4.01 to -£2.00)                           |
| Travel for primary care                    | 669            | £0.65 (£2.93)           | 1337           | £0.75 (£4.10)           | £0.11 (-£0.24 to £0.45)                             |
| Over-the-counter medication                | 490            | £7.67 (£14.09)          | 987            | £8.61 (£22.38)          | £0.94 (-£1.23 to £3.11)                             |
| Cost of prescriptions                      | 553            | £2.72 (£8.95)           | 1076           | £2.67 (£8.33)           | -£0.05 (-£0.93 to £0.82)                            |

Formatted: Line spacing: Multiple 1.25 li

Formatted: Centered, Line spacing: Multiple 1.25 li

Formatted: Centered, Line spacing: Multiple 1.25 li

Formatted: Line spacing: Multiple 1.25 li

Formatted: Line spacing: Multiple 1.25 li

Formatted: Line spacing: Multiple 1.25 li

Formatted Table

1  
2  
3  
4  
5  
6  
7  
8  
9  
10  
11  
12  
13  
14  
15  
16  
17  
18  
19  
20  
21  
22  
23  
24  
25  
26  
27  
28  
29  
30  
31  
32  
33  
34  
35  
36  
37  
38  
39  
40  
41  
42  
43  
44  
45  
46  
47  
48  
49  
50  
51  
52  
53  
54  
55  
56  
57  
58  
59  
60

|                                             |     |                    |      |                    |                               |
|---------------------------------------------|-----|--------------------|------|--------------------|-------------------------------|
| Private therapy                             | 475 | £21.98 (£70.34)    | 915  | £39.34 (£296.94)   | £17.36 (-£9.76 to £44.48)     |
| Equipment purchase                          | 473 | £17.16 (£169.12)   | 924  | £9.12 (£56.42)     | -£8.04 (-£20.08 to £4.00)     |
| Extra domestic help                         | 451 | £10.93 (£64.31)    | 905  | £13.68 (£96.02)    | £2.75 (-£7.07 to £12.56)      |
| Cost associated with loss of earnings       | 598 | £46.69 (409.72)    | 1209 | £82.78 (£885.85)   | £36.09 (-£38.63 to £110.81)   |
| <b>Value of time off work</b>               |     |                    |      |                    |                               |
| Time off work to attend physiotherapy       | 598 | £12.90 (£38.99)    | 1211 | £11.91 (£57.86)    | £0.95 (-£3.81 to £5.70)       |
| Time off work associated with the condition | 452 | £265.92 (£1350.82) | 884  | £226.61 (£1139.84) | £111.31 (-£159.04 to £379.67) |

<sup>a</sup> Uses all available data, so denominators differ by category.

Table 6: Cost-consequences. All available data<sup>a</sup>.

|                                               | n (%)     | usual care                 | n (%)      | PhysioDirect             | Incremental difference<br>(95% Confidence Interval)                    |
|-----------------------------------------------|-----------|----------------------------|------------|--------------------------|------------------------------------------------------------------------|
| <b>Mean (SD) Cost</b>                         |           |                            |            |                          |                                                                        |
| Total physiotherapy cost                      | 743       | £69.73 (£56.17)            | 1506       | £74.01<br>(£63.97)       | £4.28<br>(-£1.12 to £9.69)                                             |
| Cost of NHS services including physiotherapy  | 453 (61%) | £189.19<br>(£557.61)       | 888 (59%)  | £196.43<br>(£472.02)     | £7.24<br>(-£49.68 to £64.10)                                           |
| Total personal expenditure                    | 310 (42%) | £121.10<br>(£574.45)       | 714 (47%)  | £166.40<br>(£1040.27)    | £45.30<br>(-£78.01 to £168.61)                                         |
| Total value of all time off work <sup>b</sup> | 451 (61%) | £276.75<br>(£1355.00)      | 883 (59%)  | £240.74<br>(£1147.20)    | -£36.01<br>(-£174.69 to £102.66)                                       |
| <b>Consequences<sup>c</sup></b>               |           |                            |            |                          |                                                                        |
|                                               |           |                            |            |                          | <b>Difference/odds ratio<br/>(95% confidence interval)<sup>d</sup></b> |
| SF36v2 PCS                                    | 629 (85%) | 44.18 (10.84)              | 1283 (85%) | 43.50 (10.94)            | -0.01 (-0.80 to 0.79)                                                  |
| MYMOP <sup>e</sup>                            | 518 (70%) | 2.40 (1.38)                | 1033 (69%) | 2.40 (1.43)              | -0.02 (-0.16 to 0.11)                                                  |
| Global improvement score                      | 501 (67%) | 4.07 (1.40)                | 1001 (66%) | 4.01 (1.44)              | -0.08 (-0.23 to 0.08)                                                  |
| Response to treatment (OMERACT OARSI)         | 510 (69%) | 197 (38.6%)                | 1029 (68%) | 430 (41.8%)              | 1.14 (0.92 to 1.43)                                                    |
| Waiting time to first assessment and advice   | 618 (83%) | 34 (20 to 55) <sup>f</sup> | 1281 (85%) | 7 (4 to 15) <sup>f</sup> | 0.32 (0.29 to 0.35) <sup>g</sup>                                       |
| Patient overall satisfaction                  | 367 (49%) | 79.7 (26.5)                | 739 (49%)  | 75.9 (28.3)              | -3.8 (-7.3 to -0.3)                                                    |
| QALYs <sup>h</sup>                            | 454 (61%) | 0.322 (0.079)              | 881 (58%)  | 0.331 (0.082)            | 0.009 (-0.000 to 0.018)                                                |

<sup>a</sup> Uses all available data, so denominators differ by category

<sup>b</sup> Total of time off to attend physiotherapy and associated with the condition

<sup>c</sup> At 6 month follow-up time point

<sup>d</sup> Adjusted for outcome at baseline, gender, age, referral problem, PCT

<sup>e</sup> Lower score is better

<sup>f</sup> Median (IQR)

<sup>g</sup> Accelerated failure time analysis

<sup>h</sup> Adjusted for outcome at baseline

**Table 7: Cost-effectiveness analysis.** Includes cases with complete data on NHS costs and QALYs

|                                                                            | n   | usual care<br>mean (SD) cost | n   | PhysioDirect<br>Mean (SD) cost | Incremental difference<br>(95% CI) |
|----------------------------------------------------------------------------|-----|------------------------------|-----|--------------------------------|------------------------------------|
| <b>Cost of physiotherapy</b>                                               | 432 | £78.77 (£57.08)              | 840 | £86.75 (£65.47)                | £7.98 (£0.69 to £15.27)            |
| <b>Cost of NHS services other than<br/>physiotherapy</b>                   | 432 | £100.91 (£502.02)            | 840 | £112.23 (£476.91)              | £11.32 (-£45.08 to £67.72)         |
| <b>Total cost including physiotherapy</b>                                  | 432 | £179.68 (£504.73)            | 840 | £198.98 (482.12)               | £19.30 (-£37.60 to £76.19)         |
| <b>QALYs</b>                                                               | 432 | 0.325 (0.077)                | 840 | 0.332 (0.081)                  | 0.007 (-0.003 to 0.016)            |
| <b>Incremental cost-effectiveness ratio (ICER)</b>                         |     |                              |     |                                | £2,889                             |
| <b>Median Net Monetary Benefit (95% CI) based on bootstrapped results:</b> |     |                              |     |                                |                                    |
| <b>λ=£20,000</b>                                                           |     |                              |     |                                | £117 (-£86 to £310)                |
| probability of intervention being cost-effective                           |     |                              |     |                                | 0.88                               |
| <b>λ=£30,000</b>                                                           |     |                              |     |                                | £184 (-£106 to £461)               |
| probability of intervention being cost-effective                           |     |                              |     |                                | 0.90                               |

Table 8: Sensitivity Analysis

|                                                                     | Usual care |                                         | PhysioDirect |                           | Incremental difference<br>(-95% confidence<br>interval) |
|---------------------------------------------------------------------|------------|-----------------------------------------|--------------|---------------------------|---------------------------------------------------------|
|                                                                     | n          | mean (SD)<br>Usual<br>care<br>mean (SD) | n            | PhysioDirect mean<br>(SD) |                                                         |
| <b>(1) mimicking an efficient service</b>                           |            |                                         |              |                           |                                                         |
| Cost of physiotherapy                                               | 432        | £76.56 (£55.34)                         | 840          | £72.22 (£61.55)           | £-4.34 (£-11.25 to £2.57)                               |
| Cost of NHS services                                                | 432        | £100.91 (£502.02)                       | 840          | £112.23 (£476.91)         | £11.32 (£-45.08 to £67.72)                              |
| Total cost                                                          | 432        | £177.46 (£504.49)                       | 840          | £184.44 (£481.83)         | £6.98 (£-49.89 to £63.85)                               |
| Incremental cost-effectiveness ratio (ICER)                         |            |                                         |              |                           | £1,045                                                  |
| Median Net Monetary Benefit (95% CI) based on bootstrapped results: |            |                                         |              |                           |                                                         |
| λ=£20,000                                                           |            |                                         |              |                           | £127 (£-74 to £319)                                     |
| λ=£30,000                                                           |            |                                         |              |                           | £193 (£-95 to £473)                                     |
| <b>(2) Excluding hospital costs</b>                                 |            |                                         |              |                           |                                                         |
| Cost of physiotherapy                                               | 448        | £78.49 (£57.14)                         | 869          | £86.84 (£65.25)           | £8.35 (£1.21 to £15.50)                                 |
| Cost of NHS services excluding secondary care                       | 448        | £33.75 (£76.46)                         | 869          | £33.49 (£63.76)           | £-0.25 (£-8.05 to £7.54)                                |
| Total cost of NHS services including physiotherapy                  | 448        | £112.23 (£99.621)                       | 869          | £120.33 (£98.85)          | £8.10 (£-3.21 to £19.41)                                |
| Incremental cost-effectiveness ratio (ICER)                         |            |                                         |              |                           | £1,084                                                  |
| Median Net Monetary Benefit (95% CI) based on bootstrapped results: |            |                                         |              |                           |                                                         |
| λ=£20,000                                                           |            |                                         |              |                           | £142 (£-41 to £324)                                     |
| λ=£30,000                                                           |            |                                         |              |                           | £217 (£-56 to £489)                                     |
| <b>(3) Imputed data</b>                                             |            |                                         |              |                           |                                                         |
| Cost of physiotherapy                                               | 743        | £69.73 (£56.17)                         | 1506         | £74.01 (£63.97)           | £4.28 (£-1.12 to £9.69)                                 |
| Cost of NHS services                                                | 743        | £131.37 (£465.49)                       | 1506         | £131.51 (£384.36)         | £0.17 (£-36.13 to £36.48)                               |
| Total cost of NHS services including physiotherapy                  | 743        | £201.09 (£467.51)                       | 1506         | £205.55 (£390.04)         | £4.46 (£-32.22 to £41.14)                               |
| Quality Adjusted Life Years                                         | 743        | 0.320 (0.003)                           | 1506         | 0.322 (0.002)             | 0.002 (£-0.006 to 0.009)                                |
| Incremental cost-effectiveness ratio (ICER)                         |            |                                         |              |                           | £2,260                                                  |
| Median Net Monetary Benefit (95% CI) based on bootstrapped results: |            |                                         |              |                           |                                                         |
| λ=£20,000                                                           |            |                                         |              |                           | £34 (£-119 to £193)                                     |
| λ=£30,000                                                           |            |                                         |              |                           | £52 (£-172 to £285)                                     |
| <b>(4) Imputed data and 'efficient' service</b>                     |            |                                         |              |                           |                                                         |
| Cost of physiotherapy                                               | 743        | £67.61 (£54.19)                         | 1506         | £61.41 (£59.13)           | £-6.20 (£-11.26 to £-1.14)                              |
| Cost of NHS services                                                | 743        | £131.37 (£465.49)                       | 1506         | £131.54 (£384.36)         | £0.17 (£-36.13 to £36.48)                               |
| Total cost of NHS services including physiotherapy                  | 743        | £198.98 (£467.48)                       | 1506         | £192.95 (£389.52)         | £-6.02 (£-42.68 to £30.63)                              |
| Quality Adjusted Life Years                                         | 743        | 0.320 (0.003)                           | 1506         | 0.322 (0.002)             | 0.002 (£-0.006 to 0.009)                                |
| Incremental cost-effectiveness ratio (ICER)                         |            |                                         |              |                           | £-3,054                                                 |
| Median Net Monetary Benefit (95% CI) based on bootstrapped results: |            |                                         |              |                           |                                                         |
| λ=£20,000                                                           |            |                                         |              |                           | £47 (£-113 to £202)                                     |
| λ=£30,000                                                           |            |                                         |              |                           | £67 (£-165 to £293)                                     |

- Formatted ... [7]
- Formatted Table ... [8]
- Formatted ... [9]
- Formatted ... [10]
- Formatted ... [12]
- Formatted ... [14]
- Formatted ... [11]
- Formatted ... [13]
- Formatted ... [15]
- Formatted ... [16]
- Formatted ... [17]
- Formatted ... [18]
- Formatted ... [19]
- Formatted ... [20]
- Formatted ... [21]
- Formatted ... [22]
- Formatted ... [23]
- Formatted ... [24]
- Formatted ... [25]
- Formatted ... [26]
- Formatted ... [27]
- Formatted ... [28]
- Formatted ... [29]
- Formatted ... [30]
- Formatted ... [31]
- Formatted ... [32]
- Formatted ... [33]
- Formatted ... [34]
- Formatted ... [35]
- Formatted ... [36]
- Formatted ... [37]
- Formatted ... [38]
- Formatted ... [39]
- Formatted ... [40]
- Formatted ... [41]
- Formatted ... [42]
- Formatted ... [43]
- Formatted ... [44]
- Formatted ... [45]
- Formatted ... [46]
- Formatted ... [47]
- Formatted ... [48]
- Formatted ... [49]
- Formatted ... [50]
- Formatted ... [51]
- Formatted ... [52]
- Formatted ... [53]
- Formatted ... [54]
- Formatted ... [55]
- Formatted ... [56]
- Formatted ... [57]
- Formatted ... [58]
- Formatted ... [59]
- Formatted ... [60]
- Formatted ... [61]
- Formatted ... [62]
- Formatted ... [63]
- Formatted ... [64]
- Formatted ... [65]



1  
2  
3  
4  
5  
6  
7  
8  
9  
10  
11  
12  
13  
14  
15  
16  
17  
18  
19  
20  
21  
22  
23  
24  
25  
26  
27  
28  
29  
30  
31  
32  
33  
34  
35  
36  
37  
38  
39  
40  
41  
42  
43  
44  
45  
46  
47  
48  
49  
50  
51  
52  
53  
54  
55  
56  
57  
58  
59  
60

|

For peer review only



Figure 1. Cost-effectiveness acceptability curve showing the probability that the intervention is cost-effective at different levels of willingness to pay for one Quality Adjusted Life Year

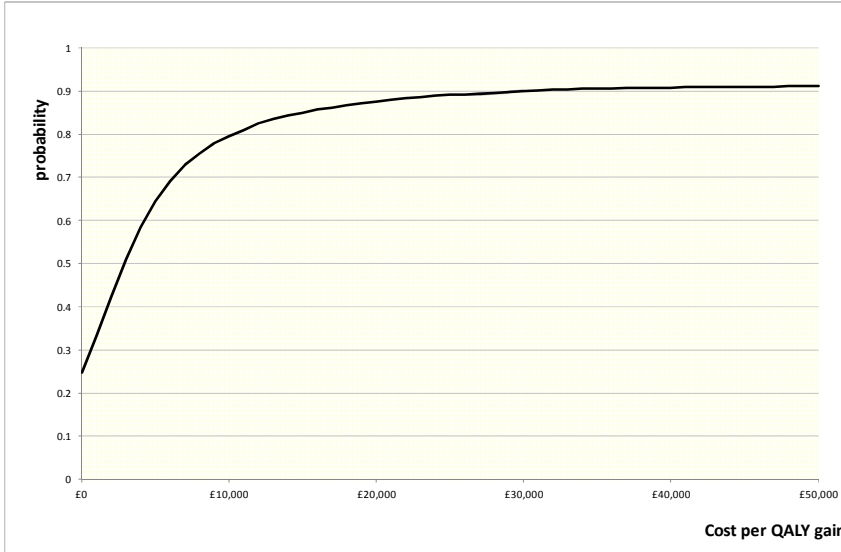

Figure 2. Cost-effectiveness acceptability curve showing the probability that the intervention is cost-effective at different levels of willingness to pay for one Quality Adjusted Life Year: Sensitivity Analyses

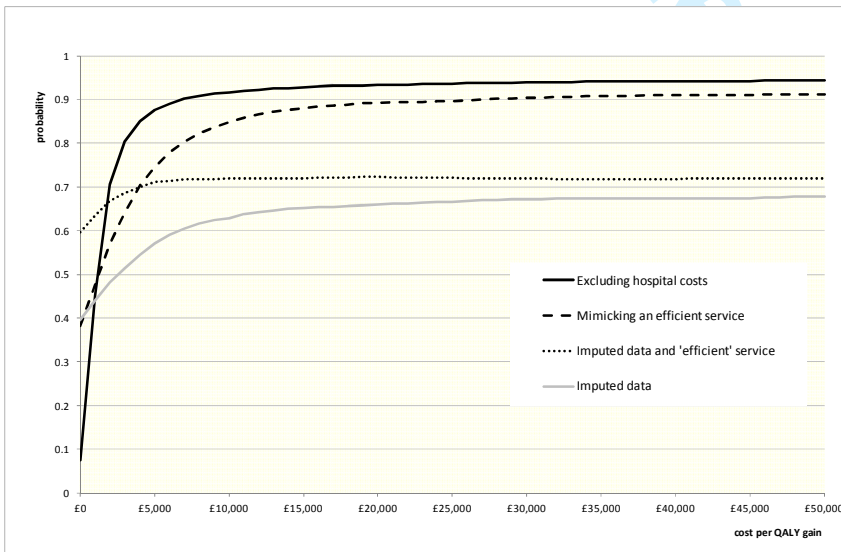

e same style, Line spacing: Multiple

1  
2 8/16/2013 11:42:00 AM

3  
4, Line spacing: Multiple 1.25 li

5 8/16/2013 11:42:00 AM  
6  
7 e same style, Line spacing: Multiple

8  
9  
10 8/16/2013 11:42:00 AM

11, line spacing: Multiple 1.25 li

12  
13 8/8/2013 5:03:00 PM  
14, Line spacing: Multiple 1.25 li

15  
16 8/8/2013 5:03:00 PM  
17, Line spacing: Multiple 1.25 li

18  
19 8/8/2013 5:03:00 PM  
20, Line spacing: Multiple 1.25 li

21  
22  
23  
24  
25  
26  
27  
28  
29  
30  
31  
32  
33  
34  
35  
36  
37  
38  
39  
40  
41  
42  
43  
44  
45  
46  
47  
48  
49  
50  
51  
52  
53  
54  
55  
56  
57  
58  
59  
60

For peer review only

, Line spacing: Multiple 1.25 li

8/8/2013 5:02:00 PM

1  
2

8/8/2013 5:02:00 PM

3  
4  
5

8/8/2013 5:03:00 PM

graphs of the same style, Line

6  
7  
8  
9  
10

8/8/2013 5:03:00 PM

, Line spacing: Multiple 1.25 li

11  
12  
13

8/8/2013 5:03:00 PM

, Line spacing: Multiple 1.25 li

14  
15  
16

8/8/2013 5:03:00 PM

, Line spacing: Multiple 1.25 li

17  
18  
19

8/8/2013 5:07:00 PM

20  
21  
22

23  
24  
25

26  
27  
28

29  
30  
31

32  
33  
34

35  
36  
37

38  
39  
40

41  
42  
43

44  
45  
46

47  
48  
49

50  
51  
52

53  
54  
55

56  
57  
58

59  
60

For peer review only

8/8/2013 5:02:00 PM

1

8/8/2013 5:02:00 PM

3

4

8/8/2013 5:03:00 PM

6

ns of the same style, Line spacing:

7

8

8/8/2013 5:03:00 PM

10

graphs of the same style, Line

11

12

13

8/8/2013 5:03:00 PM

, Line spacing: Multiple 1.25 li

16

8/8/2013 5:03:00 PM

18

, Line spacing: Multiple 1.25 li

19

8/8/2013 5:03:00 PM

21

, Line spacing: Multiple 1.25 li

22

23

24

25

26

27

28

29

30

31

32

33

34

35

36

37

38

39

40

41

42

43

44

45

46

47

48

49

50

51

52

53

54

55

56

57

58

59

60

For peer review only

, Line spacing: Multiple 1.25 li

1 8/8/2013 5:06:00 PM

4 8/8/2013 5:06:00 PM

5 of the same style, Line spacing:

8 8/8/2013 5:03:00 PM

9 the same style, Line spacing: Multiple

12 8/8/2013 5:03:00 PM

14 , Line spacing: Multiple 1.25 li

16 8/8/2013 5:03:00 PM

17 , Line spacing: Multiple 1.25 li

19 8/8/2013 5:03:00 PM

20 , Line spacing: Multiple 1.25 li

22 8/8/2013 5:03:00 PM

For peer review only

- 23
- 24
- 25
- 26
- 27
- 28
- 29
- 30
- 31
- 32
- 33
- 34
- 35
- 36
- 37
- 38
- 39
- 40
- 41
- 42
- 43
- 44
- 45
- 46
- 47
- 48
- 49
- 50
- 51
- 52
- 53
- 54
- 55
- 56
- 57
- 58
- 59
- 60

1  
2  
3  
4  
5  
6  
7  
8  
9  
10  
11  
12  
13  
14  
15  
16  
17  
18  
19  
20  
21  
22  
23  
24  
25  
26  
27  
28  
29  
30  
31  
32  
33  
34  
35  
36  
37  
38  
39  
40  
41  
42  
43  
44  
45  
46  
47  
48  
49  
50  
51  
52  
53  
54  
55  
56  
57  
58  
59  
60

For peer review only

## CHEERS checklist—Items to include when reporting economic evaluations of health interventions

| Section/item                    | Item No | Recommendation                                                                                                                                                                             | Reported on page No/line No |
|---------------------------------|---------|--------------------------------------------------------------------------------------------------------------------------------------------------------------------------------------------|-----------------------------|
| <b>Title and abstract</b>       |         |                                                                                                                                                                                            |                             |
| Title                           | 1       | Identify the study as an economic evaluation or use more specific terms such as “cost-effectiveness analysis”, and describe the interventions compared.                                    | 1/1-3                       |
| Abstract                        | 2       | Provide a structured summary of objectives, perspective, setting, methods (including study design and inputs), results (including base case and uncertainty analyses), and conclusions.    | P2-3                        |
| <b>Introduction</b>             |         |                                                                                                                                                                                            |                             |
| Background and objectives       | 3       | Provide an explicit statement of the broader context for the study. Present the study question and its relevance for health policy or practice decisions.                                  | 5/1 – 6/20                  |
| <b>Methods</b>                  |         |                                                                                                                                                                                            |                             |
| Target population and subgroups | 4       | Describe characteristics of the base case population and subgroups analysed, including why they were chosen.                                                                               | 7/14-18                     |
| Setting and location            | 5       | State relevant aspects of the system(s) in which the decision(s) need(s) to be made.                                                                                                       | 7/14-18                     |
| Study perspective               | 6       | Describe the perspective of the study and relate this to the costs being evaluated.                                                                                                        | 7/1-11                      |
| Comparators                     | 7       | Describe the interventions or strategies being compared and state why they were chosen.                                                                                                    | 7/22 - 8/5                  |
| Time horizon                    | 8       | State the time horizon(s) over which costs and consequences are being evaluated and say why appropriate.                                                                                   | 6/25 - 7/1                  |
| Discount rate                   | 9       | Report the choice of discount rate(s) used for costs and outcomes and say why appropriate.                                                                                                 | 13/14-15                    |
| Choice of health outcomes       | 10      | Describe what outcomes were used as the measure(s) of benefit in the evaluation and their relevance for the type of analysis performed.                                                    | 8/8-16                      |
| Measurement of effectiveness    | 11a     | <i>Single study-based estimates:</i> Describe fully the design features of the single effectiveness study and why the single study was a sufficient source of clinical effectiveness data. | 6/25-7/1<br>7/14-19         |
|                                 | 11b     | <i>Synthesis-based estimates:</i> Describe fully the methods used for identification of included studies and synthesis of clinical effectiveness data.                                     | n/a                         |



|    |                         |     |                                                                            |
|----|-------------------------|-----|----------------------------------------------------------------------------|
| 1  |                         |     |                                                                            |
| 2  |                         |     |                                                                            |
| 3  |                         |     |                                                                            |
| 4  | Measurement and         | 12  | If applicable, describe the population and methods used to elicit          |
| 5  | valuation of preference |     | preferences for outcomes.                                                  |
| 6  |                         |     | 8/8-9                                                                      |
| 7  | based outcomes          |     | 12/11-12                                                                   |
| 8  | Estimating resources    | 13a | <i>Single study-based economic evaluation:</i> Describe approaches used to |
| 9  | and costs               |     | estimate resource use associated with the alternative interventions.       |
| 10 |                         |     | Describe primary or secondary research methods for valuing each            |
| 11 |                         |     | resource item in terms of its unit cost. Describe any adjustments made     |
| 12 |                         |     | to approximate to opportunity costs.                                       |
| 13 |                         |     | 9/19 – 12/2                                                                |
| 14 |                         | 13b | <i>Model-based economic evaluation:</i> Describe approaches and data       |
| 15 |                         |     | sources used to estimate resource use associated with model health         |
| 16 |                         |     | states. Describe primary or secondary research methods for valuing         |
| 17 |                         |     | each resource item in terms of its unit cost. Describe any adjustments     |
| 18 |                         |     | made to approximate to opportunity costs.                                  |
| 19 |                         |     | n/a                                                                        |
| 20 |                         |     |                                                                            |
| 21 |                         |     |                                                                            |
| 22 | Currency, price date,   | 14  | Report the dates of the estimated resource quantities and unit costs.      |
| 23 | and conversion          |     | Describe methods for adjusting estimated unit costs to the year of         |
| 24 |                         |     | reported costs if necessary. Describe methods for converting costs into    |
| 25 |                         |     | a common currency base and the exchange rate.                              |
| 26 |                         |     | 12/4                                                                       |
| 27 |                         |     |                                                                            |
| 28 | Choice of model         | 15  | Describe and give reasons for the specific type of decision-analytical     |
| 29 |                         |     | model used. Providing a figure to show model structure is strongly         |
| 30 |                         |     | recommended.                                                               |
| 31 |                         |     | n/a                                                                        |
| 32 | Assumptions             | 16  | Describe all structural or other assumptions underpinning the decision-    |
| 33 |                         |     | analytical model.                                                          |
| 34 |                         |     | n/a                                                                        |
| 35 | Analytical methods      | 17  | Describe all analytical methods supporting the evaluation. This could      |
| 36 |                         |     | include methods for dealing with skewed, missing, or censored data;        |
| 37 |                         |     | extrapolation methods; methods for pooling data; approaches to             |
| 38 |                         |     | validate or make adjustments (such as half cycle corrections) to a         |
| 39 |                         |     | model; and methods for handling population heterogeneity and               |
| 40 |                         |     | uncertainty.                                                               |
| 41 |                         |     | 12/12-15                                                                   |
| 42 |                         |     | 13/8-12                                                                    |
| 43 |                         |     |                                                                            |
| 44 | <b>Results</b>          |     |                                                                            |
| 45 | Study parameters        | 18  | Report the values, ranges, references, and, if used, probability           |
| 46 |                         |     | distributions for all parameters. Report reasons or sources for            |
| 47 |                         |     | distributions used to represent uncertainty where appropriate.             |
| 48 |                         |     | n/a                                                                        |
| 49 |                         |     | Providing a table to show the input values is strongly recommended.        |
| 50 |                         |     |                                                                            |
| 51 | Incremental costs and   | 19  | For each intervention, report mean values for the main categories of       |
| 52 | outcomes                |     | estimated costs and outcomes of interest, as well as mean differences      |
| 53 |                         |     | between the comparator groups. If applicable, report incremental cost-     |
| 54 |                         |     | effectiveness ratios.                                                      |
| 55 |                         |     | 15/17-16/11                                                                |
| 56 |                         |     | Tables 5,6,7                                                               |
| 57 |                         |     |                                                                            |
| 58 |                         |     |                                                                            |
| 59 |                         |     |                                                                            |
| 60 |                         |     |                                                                            |

|                                                                      |     |                                                                                                                                                                                                                                                                             |                                                                        |
|----------------------------------------------------------------------|-----|-----------------------------------------------------------------------------------------------------------------------------------------------------------------------------------------------------------------------------------------------------------------------------|------------------------------------------------------------------------|
| Characterising uncertainty                                           | 20a | <i>Single study-based economic evaluation:</i> Describe the effects of sampling uncertainty for the estimated incremental cost and incremental effectiveness parameters, together with the impact of methodological assumptions (such as discount rate, study perspective). | 16/13-21<br>Table 7<br>Figure 1<br>16/26 – 18/5<br>Table 8<br>Figure 2 |
|                                                                      | 20b | <i>Model-based economic evaluation:</i> Describe the effects on the results of uncertainty for all input parameters, and uncertainty related to the structure of the model and assumptions.                                                                                 | n/a                                                                    |
| Characterising heterogeneity                                         | 21  | If applicable, report differences in costs, outcomes, or cost-effectiveness that can be explained by variations between subgroups of patients with different baseline characteristics or other observed variability in effects that are not reducible by more information.  | n/a                                                                    |
| <b>Discussion</b>                                                    |     |                                                                                                                                                                                                                                                                             |                                                                        |
| Study findings, limitations, generalisability, and current knowledge | 22  | Summarise key study findings and describe how they support the conclusions reached. Discuss limitations and the generalisability of the findings and how the findings fit with current knowledge.                                                                           | 18/9 – 19/25                                                           |
| <b>Other</b>                                                         |     |                                                                                                                                                                                                                                                                             |                                                                        |
| Source of funding                                                    | 23  | Describe how the study was funded and the role of the funder in the identification, design, conduct, and reporting of the analysis. Describe other non-monetary sources of support.                                                                                         | 28/6-11                                                                |
| Conflicts of interest                                                | 24  | Describe any potential for conflict of interest of study contributors in accordance with journal policy. In the absence of a journal policy, we recommend authors comply with International Committee of Medical Journal Editors recommendations.                           | 28/1-3                                                                 |

**For consistency, the CHEERS statement checklist format is based on the format of the CONSORT statement checklist**
